# Supplementary material for: Nitroiminotriazole (NIT) based potential solid propellants: synthesis, characterization, and applications
Source: Royal Society of Chemistry journal article supplement (doi:10.1039/d3dt03954d), 2023-12-22
Supplement: d3dt03954d1.pdf [file d3dt03954d1.pdf]

Electronic Supporting  
Information  
For

**Nitroiminotriazole (NIT)-  
based potential solid  
propellants: Synthesis,  
characterization and  
applications**

Sohan Lal<sup>a</sup>, Richard J. Staples<sup>b</sup>, Jean'ne M. Shreeve<sup>a\*</sup>

<sup>a</sup>Department of Chemistry, University of Idaho, Moscow, Idaho 83844-2343

<sup>b</sup>Department of Chemistry, Michigan State University, East Lansing, Michigan 48824

To whom correspondence should be addressed. E-mail: [jshreeve@uidaho.edu](mailto:jshreeve@uidaho.edu). Fax: +1-208-885-6173

| Entry | Table of Contents                                                                                                                                                                   | Page    |
|-------|-------------------------------------------------------------------------------------------------------------------------------------------------------------------------------------|---------|
| 1     | <b>Table S1.</b> Calculated Total Energy ( $E_0$ ), Zero-point Energy (ZPE), values of Thermal Correction (HT) and Enthalpy of Formation ( $\Delta H_f^\circ$ (g)) of the compounds | S3      |
| 2     | <b>Fig. S1:</b> Isodesmic reaction for the compounds <b>6</b> .                                                                                                                     | S3      |
| 3     | <b>Table S2:</b> The standard enthalpy of combustion $\Delta H_f^\circ$ (combust) for the title compounds                                                                           | S4      |
| 4     | <b>Fig. S2.</b> Computed electrostatic potential (ESP) maps of TNT, RDX.                                                                                                            | S4      |
| 5     | <b>Table S3.</b> Comparison of the ratio of positive and negative ESPs                                                                                                              | S5      |
| 6     | <b>Fig. S3.</b> HOMO and LUMO energies of compounds <b>5</b> and <b>6</b> .                                                                                                         | S5      |
| 7     | Experimental section                                                                                                                                                                | S5-S9   |
| 8     | <b>Tables S4-S9</b> and <b>Figs S4-8:</b> Single crystal X-ray data and structure refinement for compound <b>5.H<sub>2</sub>O</b>                                                   | S10-S13 |
| 9     | <b>Tables S10-S14</b> and <b>Figs S9-11:</b> Single crystal X-ray data and structure refinement for compound <b>6</b>                                                               | S14-S17 |
| 10    | <b>Tables S15-S19</b> and <b>Figs S12-17:</b> Single crystal X-ray data and structure refinement for compound <b>9</b>                                                              | S17-S24 |
| 11    | <b>Tables S20-S24</b> and <b>Figs S18-20:</b> Single crystal X-ray data and structure refinement for compound <b>14</b>                                                             | S25-S28 |
| 12    | <b>Figs S21-S48.</b> FTIR, $^1\text{H}$ , $^{13}\text{C}$ and $^{15}\text{N}$ NMR plots                                                                                             | S28-S42 |
| 13    | <b>Figs S49-S64.</b> DSC and TGA plots                                                                                                                                              | S42-S50 |
| 14    | <b>Fig S65.</b> Predicted UV-Visible spectrum of <b>5</b>                                                                                                                           | S50     |
| 15    | <b>Fig S66.</b> Predicted UV-Visible spectrum of <b>6</b>                                                                                                                           | S51     |
| 16    | <b>References</b>                                                                                                                                                                   | S51-S52 |

**Table S1.** Calculated Total Energy ( $E_0$ ), Zero-point Energy (ZPE), values of Thermal Correction ( $H_T$ ) and Enthalpy of Formation ( $\Delta H_f^\circ$  (g)) of the title compounds using B3LYP/6-31+G\*\*//MP2/6-311++G\*\* level of theory (Isodesmic).

| Compounds                                                                         | $E_0$<br>[Hartree/Particle] | ZPE<br>[Hartree/Particle] | $H_T$<br>[Hartree/Particle] | $\Delta H_f^\circ$ (g)<br>kJ/mol | $\Delta H_{\text{sub}}^\circ$<br>kJ/mol | $\Delta H_f^\circ$ (s)<br>kJ/mol |
|-----------------------------------------------------------------------------------|-----------------------------|---------------------------|-----------------------------|----------------------------------|-----------------------------------------|----------------------------------|
| CH <sub>4</sub>                                                                   | -40.39849                   | 0.044791                  | 0.003812                    | -74.60                           | ----                                    | ----                             |
| NH <sub>3</sub>                                                                   | -56.43462                   | 0.034377                  | 0.003818                    | -45.90                           | ----                                    | ----                             |
| NH <sub>2</sub> NO <sub>2</sub>                                                   | -260.5541444                | 0.038264                  | 0.004344                    | -6.10                            | ----                                    | ----                             |
| CH <sub>3</sub> CH <sub>2</sub> ONO <sub>2</sub>                                  | -358.7000232                | 0.081984                  | 0.006662                    | -147.77                          | ----                                    | ----                             |
| 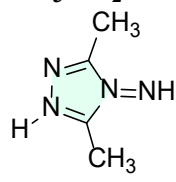 | -374.9641434                | 0.130901                  | 0.009000                    | 991.82                           | ----                                    | ----                             |
|  | -500.9635448                | 0.079025                  | 0.007837                    | 240.11                           | 89.86                                   | 150.25                           |
|  | -500.439275                 | 0.065614                  | 0.007938                    | 70.13                            | ----                                    | ----                             |
| <b>6</b>                                                                          | -1215.984062                | 0.205417                  | 0.02066                     | 810.68                           | 75.39                                   | 735.29                           |
| <b>8</b> ( <sup>+</sup> NH <sub>3</sub> NH <sub>2</sub> )                         | ----                        | ----                      | ----                        | 840.13                           | 542.44                                  | 297.69                           |
| <b>9</b> ( <sup>+</sup> NH <sub>3</sub> OH)                                       | ----                        | ----                      | ----                        | 739.62                           | 541.55                                  | 198.07                           |
| <b>10</b> (NH <sub>4</sub> <sup>+</sup> )                                         | ----                        | ----                      | ----                        | 696.53                           | 554.15                                  | 142.38                           |
| <b>11</b> (K <sup>+</sup> )                                                       | ----                        | ----                      | ----                        | 571.23                           | 563.39                                  | 7.84                             |
| <b>12</b> (Na <sup>+</sup> )                                                      | ----                        | ----                      | ----                        | 655.13                           | 574.30                                  | 80.83                            |

[a] Data are from Ref. [ D. R. Lide ed., CRC Handbook of Chemistry and Physics, 88<sup>th</sup> Edition (Internet Version 2008), CRC Press/Taylor and Francis, Boca Raton, FL.] <sup>b</sup>Obtained at G2 level. <sup>c</sup>Calculated using isodesmic equation as shown in Figure S1.

The gas-phase enthalpies of formation  $\Delta_f H^\circ$ (g) were predicted using Gaussian 03 program<sup>1</sup> based on isodesmic equations (Figure S1).

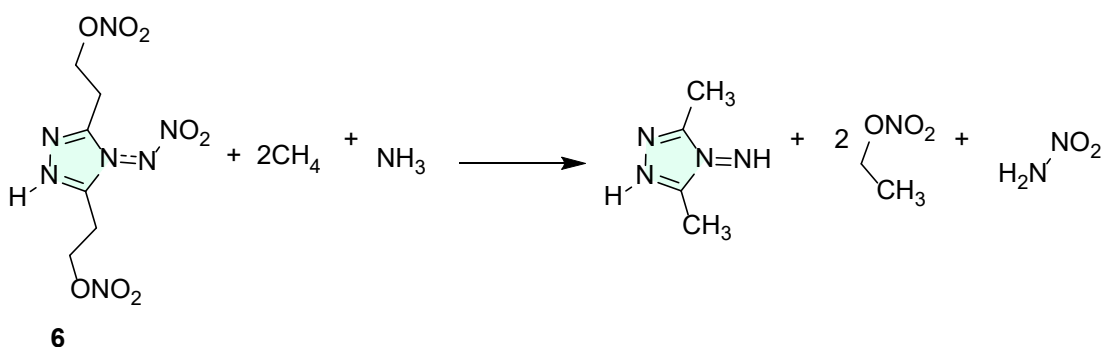

**Fig. S1:** Isodesmic reactions for the compounds **6**.

Subsequently, for compound **5**, the solid-phase enthalpy of formation  $\Delta H_f^\circ$  (s) was calculated by using equation 1.<sup>2-3</sup>

$$\Delta H_f^\circ(s) = \Delta H_f^\circ(g) - \Delta H_{\text{sub}} \quad (1)$$

Where,  $\Delta H_f^\circ(s)$  is the solid phase enthalpy of formation,  $\Delta H_f^\circ(g)$  is gas phase enthalpy of formation and  $\Delta H_{\text{sub}}$  is the enthalpy of sublimation.

The enthalpy of sublimation was estimated using equation 2 based on Trouton's rule:<sup>3,4</sup>

$$\Delta H_{\text{sub}} = 0.188 \times T / \text{kJmol}^{-1} \text{K}^{-1} \quad (2)$$

where,  $T$ , is either the melting point (mp) or the decomposition temperature ( $T_d$ ), when melting does not occur before decomposition.

For salts **8-12**, the solid phase enthalpies of formation were obtained using the Born-Haber energy cycle.<sup>3</sup>

The bond dissociation energies (BDEs) of compound **5** were estimated according to equ. 3.

$$\text{BDE [AB]} = E_0 [\text{A.}] + E_0 [\text{B.}] - E_0 [\text{AB}] \quad (3)$$

where, BDE [AB] is bond dissociation energy and  $E_0 [\text{A.}]$  and  $E_0 [\text{B.}]$  are the energies of individual homolytic part and  $E_0 [\text{AB}]$  is the total energy of the individual molecule.

**Table S2.** The standard enthalpies of combustion,  $\Delta H_f^\circ(\text{combust})$ , for the title compounds were calculated by equations 4-8.

$$\Delta H_f^\circ(\text{combust}) = \Sigma \Delta H_f^\circ(\text{products}) - \Sigma \Delta H_f^\circ(\text{reactants}) \quad (4)$$

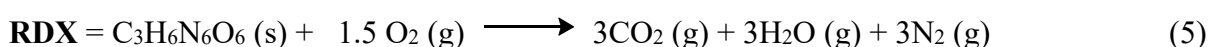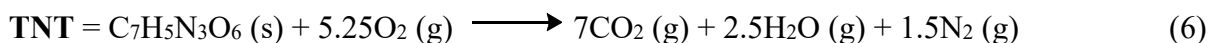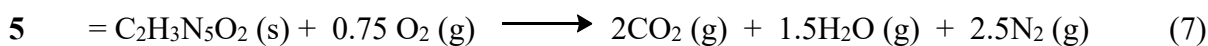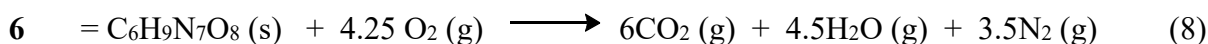

The standard enthalpy of formation for  $\text{CO}_2$  ( $\Delta H_f^\circ(\text{CO}_2) = -393.51 \text{ kJmol}^{-1}$ );  $\text{H}_2\text{O}$  ( $\Delta H_f^\circ(\text{H}_2\text{O}) = -243.015 \text{ kJmol}^{-1}$ ).

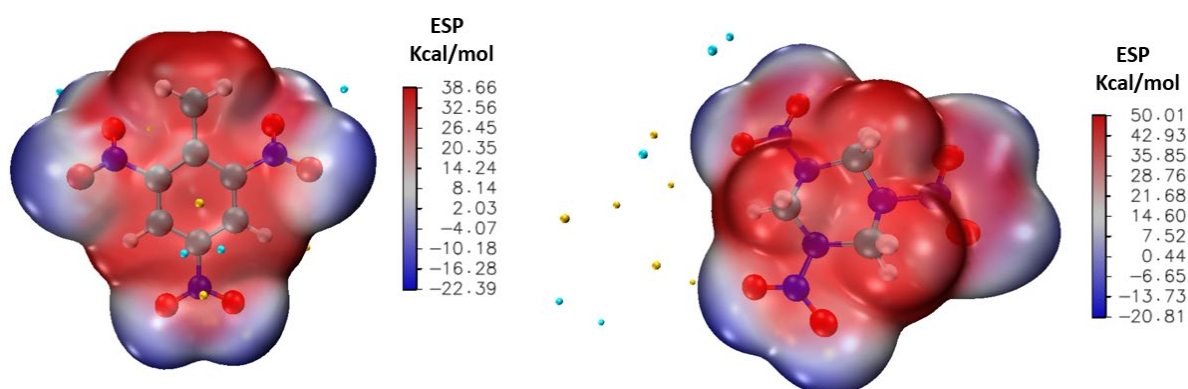

**Fig. S2:** Computed electrostatic potential (ESP) maps of TNT and RDX.

**Table S3.** Comparison of the ratio of positive and negative ESPs and the surface area of ESPs of compounds and positive variance, total variance, balance of charges and product of total variance and balance of charges.

| Compounds  | $A_{tot}^a$<br>$\text{\AA}^2$ | $A_{pos}^b$<br>$\text{\AA}^2$ | $A_{neg}^c$<br>$\text{\AA}^2$ | ratio <sub>pos</sub><br>(%) | ratio <sub>neg</sub><br>(%) | $\sigma_{tot}^2$ <sup>d</sup><br>(kcal/mol) |
|------------|-------------------------------|-------------------------------|-------------------------------|-----------------------------|-----------------------------|---------------------------------------------|
| <b>5</b>   | 144.74                        | 76.25                         | 68.49                         | 52.68                       | 47.32                       | 69.93                                       |
| <b>6</b>   | 298.47                        | 158.36                        | 140.11                        | 53.06                       | 46.94                       | 86.31                                       |
| <b>11</b>  | 475.34                        | 262.21                        | 213.13                        | 55.16                       | 44.84                       | 197.45                                      |
| <b>RDX</b> | 209.49                        | 116.77                        | 92.72                         | 55.74                       | 44.26                       | 27.29                                       |

<sup>a</sup> $SA_{tot}$  = Total surface area. <sup>b</sup> $SA_{pos}$  = positive surface area. <sup>c</sup> $SA_{neg}$  = Negative surface area. <sup>d</sup>Ratio of positive surface area <sup>e</sup>Ratio of negative surface area. <sup>g</sup>Product of total variance and balance of charges.

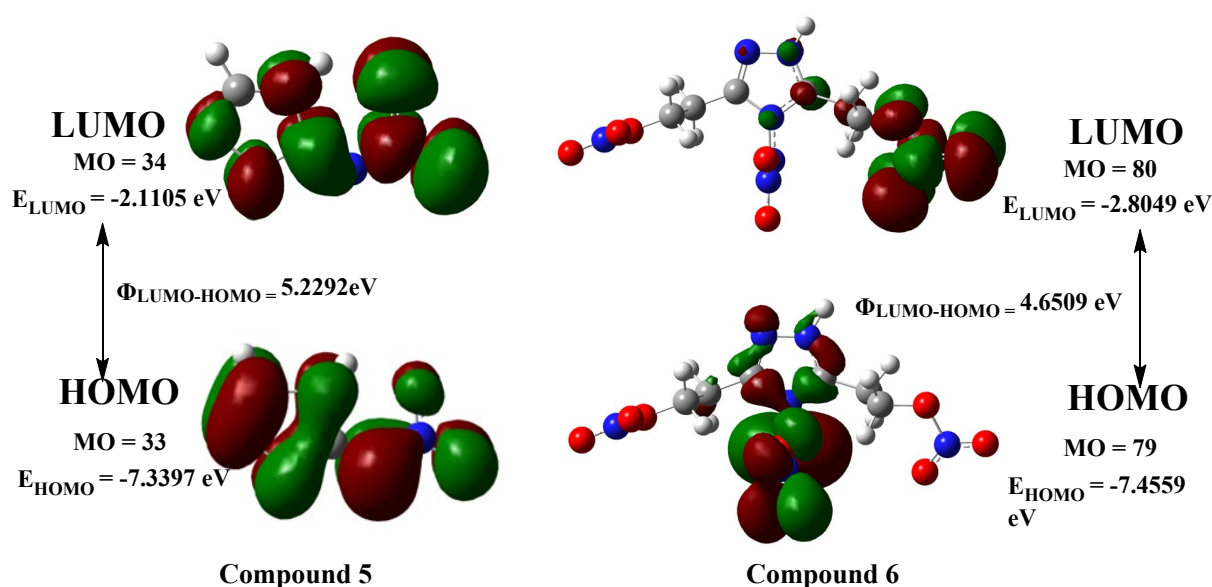

**Fig. S3:** HOMO and LUMO energies of compounds **5** and **6**.

## EXPERIMENTAL SECTION

### General Methods

All reagents and solvents were used as received unless otherwise specified (AKSci, Sigma-Aldrich, Acros Organics, VWR). The densities of the new compounds were obtained at 25 °C with a Micromeritics Accupyc II 1340 gas pycnometer. The thermal stability (melting and decomposition points) was measured by heating individual samples from 35 °C to 400 °C at the heating rates of 5 °C and 10 °C min<sup>-1</sup> using a

differential scanning calorimeter (DSC, TA Instruments Company, Model: Q2000) and thermogravimetric analysis (TGA, TA Instruments Company, Model: Q50). The FTIR spectra were recorded with KBr plates on a Thermo Nicolet AVATAR 370 spectrometer.  $^1\text{H}$  and  $^{13}\text{C}$  NMR spectra were recorded on a 500 MHz (Bruker) nuclear magnetic resonance spectrometer operating at 500.19 and 125.77 MHz, respectively, using DMSO- $d_6$  as the solvent and locking solvent. The  $^{15}\text{N}$  NMR spectra were recorded on a 500.19 MHz (Bruker 500) nuclear magnetic resonance operating at 50.70 MHz. As external standards, the chemical shifts are given relative to tetramethylsilane ( $^1\text{H}$ ,  $^{13}\text{C}$ ) and nitromethane ( $^{15}\text{N}$ ). Elemental analyses (C, H, N) were performed using a Vario Micro cube Elemental Analyser. The friction sensitivities (FS) and impact sensitivities (IS) were measured with a standard BAM friction tester and BAM drop hammer.<sup>5</sup> Crystals of **6**, **11** and **14** was mounted on a nylon loop with Paratone oil on an XtaLAB Synergy, Dualflex, HyPix diffractometer at 100 K. The structures were solved with the ShelXT<sup>6-9</sup> solution program using dual methods and Olex2.<sup>10</sup> The model was refined with ShelXL34 using full matrix least squares minimization on  $F^2$ .

**Caution!** The compounds studied in the present work are potentially high-energy materials. Therefore, it is strongly recommended that these compounds should be synthesized and handled with extreme care with all the standard safety precautions employed.

**2,4-Dihydro-3H-1,2,4-triazol-3-ylidene-nitramide (5).** Fuming  $\text{HNO}_3$  (25.2 mL, 600 mmol, 10 equiv.) was cooled at 0 °C and  $\text{H}_2\text{SO}_4$  (98%, 32.0 mL, 600 mmol, 10 equiv.) was added dropwise. The resulting mixture was stirred for 30 min at the same temperature. Compound **7** (5.04 g, 60 mmol, 1 equiv.) was added portion-wise. The resulting reaction mixture was stirred at room temperature for 10 h and poured into ice-cold water. The white solid which was formed was filtered off, dried, and triturated with

acetonitrile. Crystalline, white solid; Yield: 7.040 g, 91%, DSC (5 °C min<sup>-1</sup>): T<sub>d</sub> (onset) 205 °C; IR (KBr pellet)  $\tilde{\nu}$  3121 (s), 2951 (s), 1591 (s), 1541 (s), 1462 (s), 1403 (m), 1316 (s), 1281 (s), 1098 (m), 1058 (m), 997 (w), 951 (m), 869 (m), 849 (m), 776 (w), 719 (m) cm<sup>-1</sup>; <sup>1</sup>H NMR (500.19 MHz, DMSO-d<sub>6</sub>):  $\delta$  8.44 (s, 1H), 14.14 (s, 2H); <sup>13</sup>C NMR (125.77 MHz, DMSO-d<sub>6</sub>):  $\delta$  139.2, 152.4; Elemental analysis: calcd (%) for C<sub>2</sub>H<sub>3</sub>N<sub>5</sub>O<sub>2</sub> (129.08): C, 18.61; H, 2.34; N, 54.26. Found C, 18.70; H, 2.55; N, 54.86.

**(4-(Nitroamino)-4H-1 $\lambda$ <sup>4</sup>,2,4-triazole-3,5-diyl)bis(ethane-2,1-diyl) dinitrate (6).** H<sub>2</sub>SO<sub>4</sub> (98%, 2.7 mL, 50 mmol, 10 equiv.) was cooled at 0 °C and fuming HNO<sub>3</sub> (2.1 mL, 50 mmol, 10 equiv.) was added dropwise. The resulting mixture was stirred for 15 min at the same temperature. Compound **14** (0.860 g, 5 mmol, 1 equiv.) was added portion-wise. The resulting reaction mixture was stirred at room temperature for 6 h and poured into ice-cold water and extracted with DCM. The solvent was evaporated in air and a colorless solid was further purified by the trituration with hexane. Crystalline, colorless solid; Yield: 1.23 g, 80%, DSC (5 °C min<sup>-1</sup>): T<sub>m</sub> 121 °C; T<sub>d</sub> (onset) 134 °C; IR (KBr pellet)  $\tilde{\nu}$  3026 (m), 2995 (m), 2967 (m), 2901 (s), 2703 (s), 2639 (s), 1622 (s), 1557 (m), 1460 (s), 1406 (s), 1335 (s), 1278 (s), 1254 (s), 1189 (m), 1104 (m), 1048 (m), 1010 (s), 978 (s), 889 (s), 846 (s), 773 (s), 752 (s), 715 (m), 699 (m) cm<sup>-1</sup>; <sup>1</sup>H NMR (500.19 MHz, DMSO-d<sub>6</sub>):  $\delta$  3.26 (t, *J* = 6.8Hz, 4H), 4.85 (t, *J* = 6.8Hz, 4H), 10.4 (brs, 1H); <sup>13</sup>C NMR (125.77 MHz, DMSO-d<sub>6</sub>):  $\delta$  21.9, 68.3, 151.1; <sup>15</sup>N NMR (50.70 MHz, DMSO-d<sub>6</sub>):  $\delta$  -3.47, -42.17, -128.58, -134.10, -168.62; Elemental analysis: calcd (%) for C<sub>6</sub>H<sub>9</sub>N<sub>7</sub>O<sub>8</sub> (307.18): C, 23.46; H, 2.95; N, 31.92. Found C, 23.54; H, 2.88; N, 32.67.

#### **General procedure for the syntheses of salts 8-12.**

Compound **5** (1.290 g, 10 mmol, 1 equiv.) was dissolved in water (5 mL), and hydrazine hydrate or hydroxylamine monohydrate or aq ammonia or KOH or NaOH (50 mmol, 5 equiv.) was added dropwise; a white precipitate was formed, and the suspension was

stirred for 5 h at room temperature. The solvent was evaporated, and the solid taken up in acetonitrile. The reaction mixture was filtered to give a crude compound, which was further purified by trituration with acetonitrile.

***Hydrazinium-5-(nitroimino)-1,5-dihydro-1,2,4-triazol-4-ide (8)***. Crystalline, light-yellow solid; Yield: 1.58 g, 98%, DSC (5 °C min<sup>-1</sup>): T<sub>d (onset)</sub> 211 °C. IR (KBr pellet)  $\tilde{\nu}$  3283-2775 (brs), 1871 (s), 1829 (m), 1707 (w), 1527 (s), 1483 (s), 1341 (s), 1306 (s), 1283 (s), 1236 (s), 1215 (s), 1110 (s), 1064 (s), 1006 (s), 976 (s), 918 (s), 854 (s) cm<sup>-1</sup>; <sup>1</sup>H NMR (500.19 MHz, DMSO-d<sub>6</sub>):  $\delta$  7.69 (s, 1H), 8.66 (s, 5H); <sup>13</sup>C NMR (125.77 MHz, DMSO-d<sub>6</sub>):  $\delta$  148.6, 156.7; Elemental analysis: calcd (%) for C<sub>2</sub>H<sub>7</sub>N<sub>7</sub>O<sub>2</sub> (161.13): C, 14.91; H, 4.38; N, 60.85. Found C, 15.40; H, 4.09; N, 58.77.

***Hydroxylammonium-5-(nitroimino)-1,5-dihydro-1,2,4-triazol-4-ide (9)***. Crystalline, light-yellow solid; Yield: 1.89 g, 97%, DSC (5 °C min<sup>-1</sup>) T<sub>d (onset)</sub> 213 °C. IR (KBr pellet)  $\tilde{\nu}$  3274-2464 (brs), 1610 (m), 1497 (s), 1342 (s), 1259 (s), 1103 (s), 1076 (s), 1021 (m), 1004 (m), 976 (s), 924 (m), 891 (m), 868 (m), 767 (m), 729 (s) cm<sup>-1</sup>. <sup>1</sup>H NMR (500.19 MHz, DMSO-d<sub>6</sub>):  $\delta$  7.67 (s, 1H), 9.21 (br s, 4H); <sup>13</sup>C NMR (125.77 MHz, DMSO-d<sub>6</sub>):  $\delta$  148.4, 156.6; Elemental analysis: calcd (%) for C<sub>2</sub>H<sub>9</sub>N<sub>7</sub>O<sub>4</sub> (195.14): C, 12.31; H, 4.65; N, 50.25. Found C, 12.91; H, 4.73; N, 50.41.

***Ammonium-5-(nitroimino)-1,5-dihydro-1,2,4-triazol-4-ide (10)***. Crystalline, colorless solid; Yield: 1.43 g, 98%, DSC (5 °C min<sup>-1</sup>): T<sub>d (onset)</sub> 218 °C; IR (KBr pellet)  $\tilde{\nu}$  3184-2757 (brs), 1528 (s), 1454 (s), 1343 (s), 1283 (s), 1236 (s), 1106 (s), 1062 (s), 1006 (m), 974 (s), 918 (s), 852 (m), 771 (s), 731 (s) cm<sup>-1</sup>; <sup>1</sup>H NMR (500.19 MHz, DMSO-d<sub>6</sub>):  $\delta$  7.40 (s, 4H), 7.83 (s, 1H); <sup>13</sup>C NMR (125.77 MHz, DMSO-d<sub>6</sub>):  $\delta$  146.3, 155.7; Elemental analysis: calcd (%) for C<sub>2</sub>H<sub>6</sub>N<sub>6</sub>O<sub>2</sub> (146.11): C, 16.44; H, 4.14; N, 57.52. Found C, 16.44; H, 4.21; N, 57.92.



**Potassium-5-(nitroimino)-1,5-dihydro-1,2,4-triazol-4-ide (11).** Crystalline, light brown solid; Yield: 3.70 g, 99%, DSC (5 °C min<sup>-1</sup>): T<sub>d</sub> (onset) 258 °C; IR (KBr pellet)  $\tilde{\nu}$  3132 (w), 158 (s), 1474 (s), 1441 (s), 1382 (s), 1339 (s), 1257 (s), 1204 (w), 1185 (m), 1094 (w), 1062 (s), 995 (s), 893 (m), 857 (m), 802 (w), 747 (m), 718 (m); <sup>1</sup>H NMR (500.19 MHz, DMSO-d<sub>6</sub>):  $\delta$  7.55 (s, 1H), 12.78 (brs, 1H); <sup>13</sup>C NMR (125.77 MHz, DMSO-d<sub>6</sub>):  $\delta$  148.8, 157.1; Elemental analysis: calcd (%) for C<sub>4</sub>H<sub>4</sub>K<sub>3</sub>N<sub>10</sub>O<sub>4</sub> (373.44): C, 12.87; H, 1.08; N, 37.51. Found C, 12.37; H, 0.90; N, 36.20.

**Sodium--5-(nitroimino)-1,5-dihydro-1,2,4-triazol-4-ide (12·H<sub>2</sub>O).** Crystalline, light brown solid; Yield: 1.87 g, 98%, DSC (5 °C min<sup>-1</sup>): T<sub>d</sub> (onset) 378 °C; IR (KBr pellet)  $\tilde{\nu}$  3337 (s), 3096 (s), 1682 (m), 1440 (s), 1390 (s), 1342 (s), 1312 (s), 1263 (s), 1202 (s), 1069 (s), 1041 (s), 1001 (s), 891 (m), 861 (s), 724 (s), 686 (s) cm<sup>-1</sup>; <sup>1</sup>H NMR (500.19 MHz, DMSO-d<sub>6</sub>):  $\delta$  7.44 (s, 1H); <sup>13</sup>C NMR (125.77 MHz, DMSO-d<sub>6</sub>):  $\delta$  148.8, 157.0; Elemental analysis: calcd (%) for C<sub>2</sub>HNaN<sub>5</sub>O<sub>2</sub>·H<sub>2</sub>O (191.06): C, 12.57; H, 1.58; N, 36.36. Found C, 12.80; H, 1.51; N, 36.53.

**2,2'-(4-amino-4H-1,2,4-triazole-3,5-diyl)bis(ethan-1-ol) (13).** Commercially available 3-hydroxypropanenitrile **13**, (3.550 g, 50 mmol, 1 equiv), sulfur powder (0.960 g, 30 mmol, 0.6 equiv) and hydrazine monohydrate (12.5 g, 250 mmol, 5 equiv) heated at 80 °C in ethanol for 10 h. The resulting reaction mixture was cooled, ethanol was evaporated, and sulfur was removed by washing with toluene. The crude residue was further purified by recrystallization with ethanol. Crystalline, colorless solid; Yield: 3.70 g, 86%, DSC (5 °C min<sup>-1</sup>): T<sub>m</sub> = 150 °C (melting point); IR (KBr pellet)  $\tilde{\nu}$  3321-2692 (brs), 1614 (s), 1531 (s), 1476 (s), 1423 (s), 1388 (s), 1359 (s), 1323 (m), 1285 (m), 1209 (m), 1055 (s), 974 (s), 875 (s), 802 (m), 787 (m), 743 (s), 702 (m) cm<sup>-1</sup>; <sup>1</sup>H NMR (500.19 MHz, DMSO-d<sub>6</sub>):  $\delta$  2.85 (t, *J* = 6.8Hz, 4H), 3.71 (t, *J* = 6.8Hz, 4H), 4.99 (brs, 2H), 5.81 (brs, 2H); <sup>13</sup>C NMR (125.77 MHz, DMSO-d<sub>6</sub>):  $\delta$  21.9, 68.3, 151.1; <sup>15</sup>N NMR (50.70

MHz, DMSO-d<sub>6</sub>):  $\delta$  -79.23, -200.75, -319.34; Elemental analysis: calcd (%) for C<sub>6</sub>H<sub>12</sub>N<sub>4</sub>O<sub>2</sub> (172.19): C, 41.85; H, 7.02; N, 32.54. Found C, 41.78; H, 7.43; N, 33.13.

**Table S4.** Single crystal X-ray data and structure refinement for compound **5**.<sup>6-10</sup>

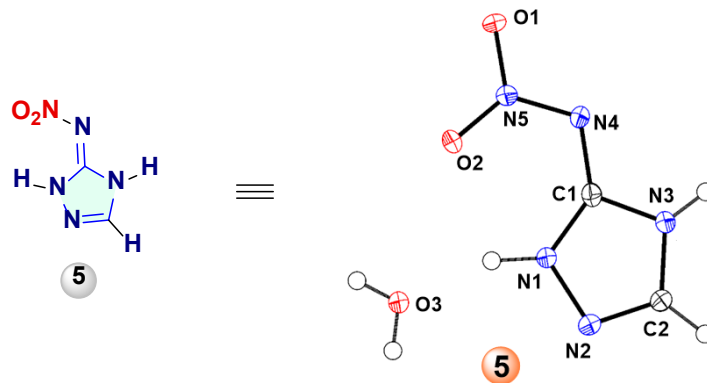

| Compound                     | 5                                                             |
|------------------------------|---------------------------------------------------------------|
| CCDC                         | 2303917                                                       |
| Formula                      | C <sub>4</sub> H <sub>10</sub> N <sub>10</sub> O <sub>6</sub> |
| $D_{calc.}/\text{g cm}^{-3}$ | 1.740                                                         |
| $m/\text{mm}^{-1}$           | 1.396                                                         |
| Formula Weight               | 294.22                                                        |
| Colour                       | colourless                                                    |
| Shape                        | irregular-shaped                                              |
| Size/mm <sup>3</sup>         | 0.15×0.12×0.04                                                |
| $T/\text{K}$                 | 100.00(10)                                                    |
| Crystal System               | monoclinic                                                    |
| Flack Parameter              | -0.17(18)                                                     |
| Hooft Parameter              | -0.27(16)                                                     |
| Space Group                  | $P2_1$                                                        |
| $a/\text{Å}$                 | 5.16088(12)                                                   |
| $b/\text{Å}$                 | 8.67413(16)                                                   |
| $c/\text{Å}$                 | 6.54739(15)                                                   |
| $a/^\circ$                   | 90                                                            |
| $b/^\circ$                   | 106.652(2)                                                    |
| $g/^\circ$                   | 90                                                            |
| $V/\text{Å}^3$               | 280.810(11)                                                   |
| $Z$                          | 1                                                             |
| $Z'$                         | 0.5                                                           |
| Wavelength/Å                 | 1.54184                                                       |
| Radiation type               | Cu K <sub><math>\alpha</math></sub>                           |
| $Q_{min}/^\circ$             | 7.059                                                         |
| $Q_{max}/^\circ$             | 80.067                                                        |
| Measured Refl's.             | 2882                                                          |
| Indep't Refl's               | 1171                                                          |
| Refl's $I \geq 2\sigma(I)$   | 1153                                                          |
| $R_{int}$                    | 0.0280                                                        |
| Parameters                   | 107                                                           |
| Restraints                   | 1                                                             |
| Largest Peak                 | 0.191                                                         |
| Deepest Hole                 | -0.259                                                        |
| GooF                         | 1.064                                                         |
| $wR_2$ (all data)            | 0.0754                                                        |
| $wR_2$                       | 0.0751                                                        |
| $R_1$ (all data)             | 0.0285                                                        |
| $R_1$                        | 0.0283                                                        |

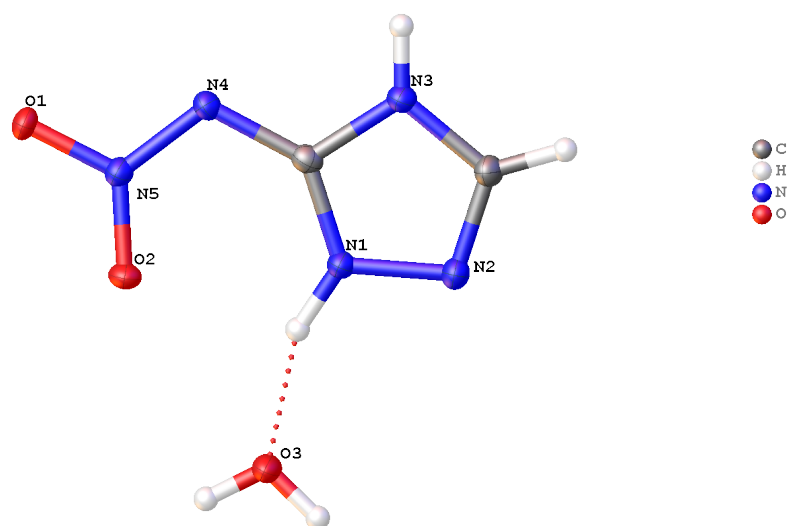

**Fig. S4.** Drawing at 50% ellipsoids with hetero atoms labelled and hydrogen atoms on the nitrogen atoms found and refined isotropically.

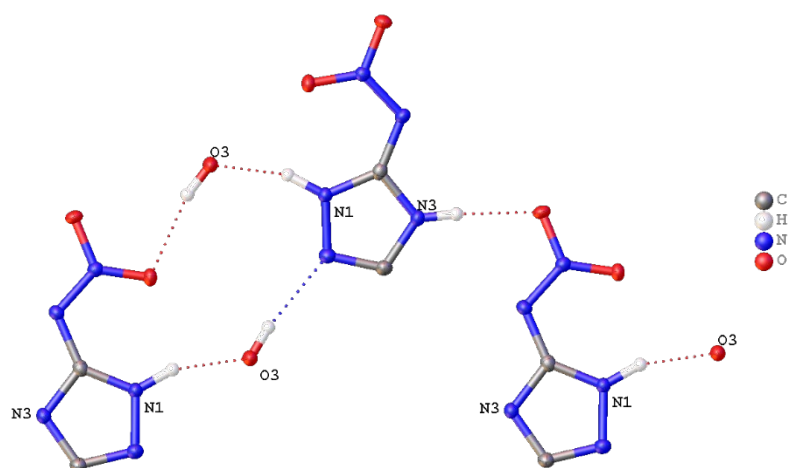

**Fig. S5.** The following hydrogen bonding interactions with a maximum D-D distance of 2.9 Å and a minimum angle of 120° are present in compound **5**: O3–O2<sub>1</sub>: 2.868 Å, N3–O1<sub>2</sub>: 2.794 Å, N1–O3: 2.678 Å.

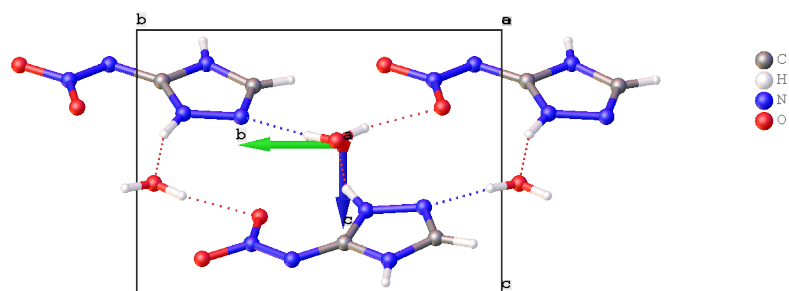

**Fig. S6.** Packing diagram of compound **5** viewed along the a axis

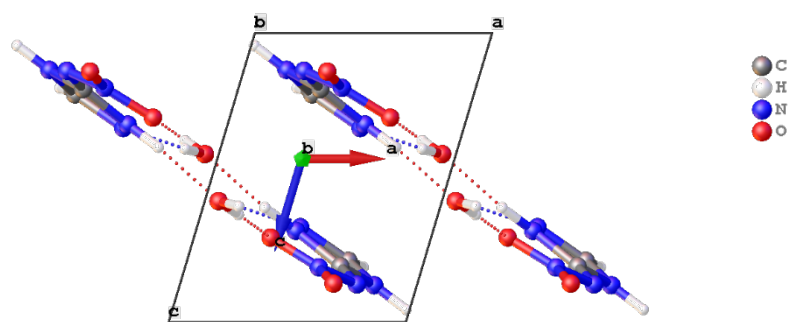

**Fig. S7.** Packing diagram of compound **5** viewed along the b axis

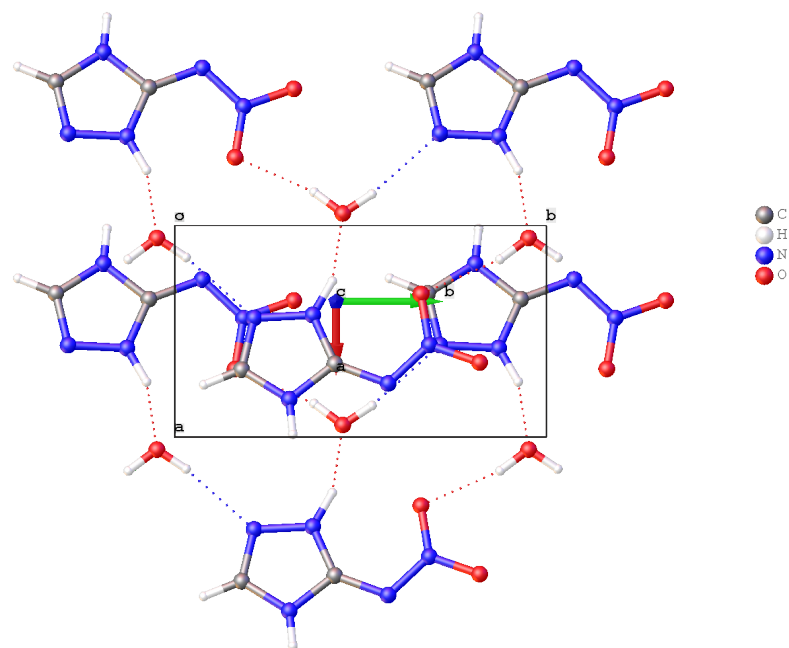

**Fig. S8.** Packing diagram of compound **5** viewed along the c axis

**Table S5:** Bond Lengths in Å for compound **5**.

| Atom | Atom | Length/Å |
|------|------|----------|
| O1   | N5   | 1.268(3) |
| O2   | N5   | 1.246(3) |
| N5   | N4   | 1.322(3) |
| N4   | C1   | 1.356(3) |
| N3   | C1   | 1.357(3) |
| N3   | C2   | 1.354(4) |
| N1   | N2   | 1.374(3) |
| N1   | C1   | 1.337(3) |
| N2   | C2   | 1.307(3) |

**Table S6:** Bond Angles in ° for compound **5**.

| Atom | Atom | Atom | Angle/°    |
|------|------|------|------------|
| O1   | N5   | N4   | 115.74(19) |
| O2   | N5   | O1   | 120.29(19) |
| O2   | N5   | N4   | 124.0(2)   |
| N5   | N4   | C1   | 114.8(2)   |
| C2   | N3   | C1   | 107.29(19) |
| C1   | N1   | N2   | 111.4(2)   |
| C2   | N2   | N1   | 104.2(2)   |
| N4   | C1   | N3   | 119.1(2)   |
| N1   | C1   | N4   | 135.4(2)   |
| N1   | C1   | N3   | 105.5(2)   |
| N2   | C2   | N3   | 111.6(2)   |

**Table S7:** Torsion Angles in ° for compound **5**.

| Atom | Atom | Atom | Atom | Angle/°     |
|------|------|------|------|-------------|
| O1   | N5   | N4   | C1   | -179.73(19) |
| O2   | N5   | N4   | C1   | 1.3(3)      |
| N5   | N4   | C1   | N3   | -175.5(2)   |
| N5   | N4   | C1   | N1   | 5.3(4)      |
| N1   | N2   | C2   | N3   | 0.2(3)      |
| N2   | N1   | C1   | N4   | 179.9(2)    |
| N2   | N1   | C1   | N3   | 0.6(3)      |
| C1   | N3   | C2   | N2   | 0.2(3)      |
| C1   | N1   | N2   | C2   | -0.5(3)     |
| C2   | N3   | C1   | N4   | -179.9(2)   |
| C2   | N3   | C1   | N1   | -0.5(3)     |

**Table S8:** Hydrogen Fractional Atomic Coordinates ( $\times 10^4$ ) and Equivalent Isotropic Displacement Parameters ( $\text{\AA}^2 \times 10^3$ ) for compound **5**.  $U_{eq}$  is defined as 1/3 of the trace of the orthogonalised  $U_{ij}$ .

| Atom | x         | y        | z        | $U_{eq}$ |
|------|-----------|----------|----------|----------|
| H2   | 7516.94   | 788.47   | 8100.6   | 21       |
| H3A  | -1500(80) | 5310(50) | 4000(60) | 23(8)    |
| H3B  | -1590(80) | 3760(50) | 3720(60) | 29(9)    |
| H3   | 9850(80)  | 3180(60) | 9560(70) | 44(11)   |
| H1   | 2620(80)  | 4240(50) | 6050(60) | 35(10)   |

**Table S9:** Hydrogen Bond information for compound **5**.

| D  | H   | A               | d(D-H)/\AA | d(H-A)/\AA | d(D-A)/\AA | D-H-A/deg |
|----|-----|-----------------|------------|------------|------------|-----------|
| O3 | H3B | O2 <sup>1</sup> | 0.85(4)    | 2.04(4)    | 2.868(3)   | 167(4)    |
| N3 | H3  | O1 <sup>2</sup> | 0.88(4)    | 1.92(4)    | 2.794(3)   | 175(4)    |
| N1 | H1  | O3              | 0.95(4)    | 1.77(4)    | 2.678(3)   | 159(4)    |

<sup>1</sup>-x,-1/2+y,1-z; <sup>2</sup>2-x,-1/2+y,2-z

**Table S10.** Single crystal X-ray data and structure refinement for compound **6**.<sup>6-10</sup>

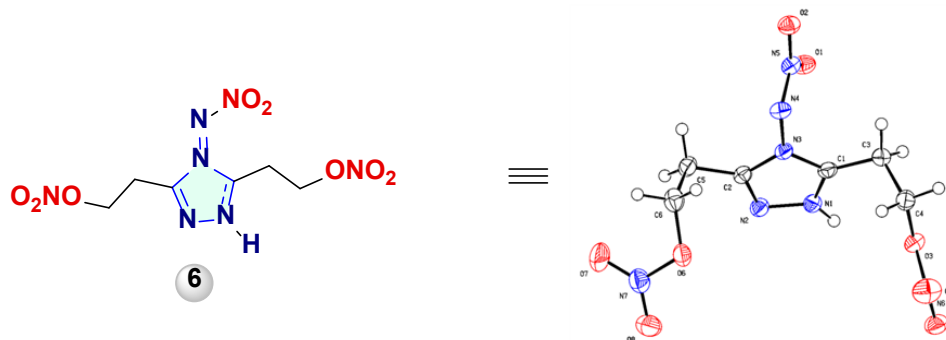

|                              |                                                             |
|------------------------------|-------------------------------------------------------------|
| Formula                      | C <sub>6</sub> H <sub>9</sub> N <sub>7</sub> O <sub>8</sub> |
| $D_{calc.}/\text{g cm}^{-3}$ | 1.699                                                       |
| $m/\text{mm}^{-1}$           | 1.395                                                       |
| Formula Weight               | 307.20                                                      |
| Color                        | yellow                                                      |
| Shape                        | block-shaped                                                |
| Size/ $\text{mm}^3$          | 0.12×0.05×0.02                                              |
| $T/\text{K}$                 | 100.00(10)                                                  |
| Crystal System               | orthorhombic                                                |
| Space Group                  | <i>Pbca</i>                                                 |
| $a/\text{Å}$                 | 6.2321(2)                                                   |
| $b/\text{Å}$                 | 10.9604(3)                                                  |
| $c/\text{Å}$                 | 35.1593(9)                                                  |
| $\alpha/^\circ$              | 90                                                          |
| $\beta/^\circ$               | 90                                                          |
| $\gamma/^\circ$              | 90                                                          |
| $V/\text{Å}^3$               | 2401.60(12)                                                 |
| $Z$                          | 8                                                           |
| $Z'$                         | 1                                                           |
| Wavelength/ $\text{Å}$       | 1.54184                                                     |
| Radiation type               | Cu $K_\alpha$                                               |
| $Q_{min}/^\circ$             | 2.513                                                       |
| $Q_{max}/^\circ$             | 77.295                                                      |
| Measured Refl's.             | 8297                                                        |
| Indep't Refl's               | 2332                                                        |
| Refl's $I \geq 2\sigma(I)$   | 2042                                                        |
| $R_{int}$                    | 0.0453                                                      |
| Parameters                   | 194                                                         |
| Restraints                   | 0                                                           |
| Largest Peak                 | 0.406                                                       |
| Deepest Hole                 | -0.264                                                      |
| Goof                         | 1.055                                                       |
| $wR_2$ (all data)            | 0.1168                                                      |
| $wR_2$                       | 0.1124                                                      |
| $R_1$ (all data)             | 0.0502                                                      |
| $R_1$                        | 0.0432                                                      |

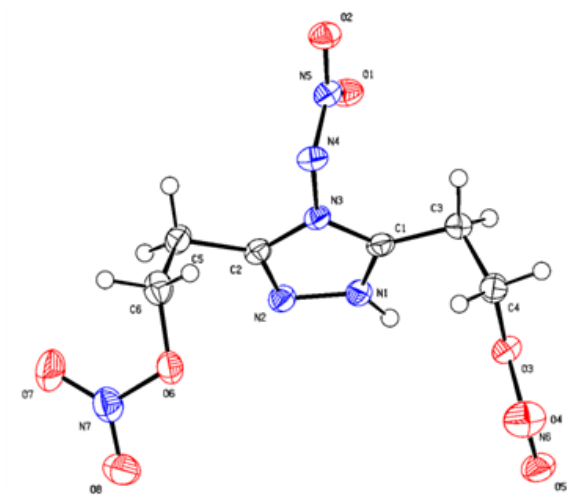

**Fig. S9.** Molecular structure (thermal ellipsoid plot (50%) of compound **6** (CCDC, 2296314).

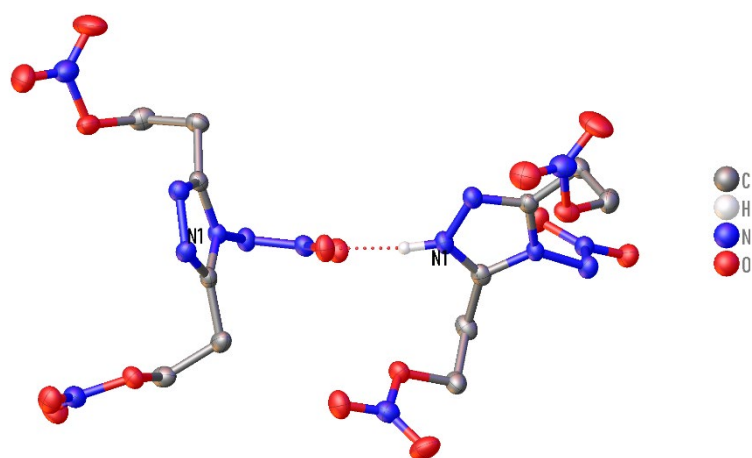

**Fig. S10.** The following hydrogen bonding interactions with a maximum D-D distance of 3.1 Å and a minimum angle of 110° are present in compound **6**: N1–O1<sub>1</sub>: 2.685 Å.

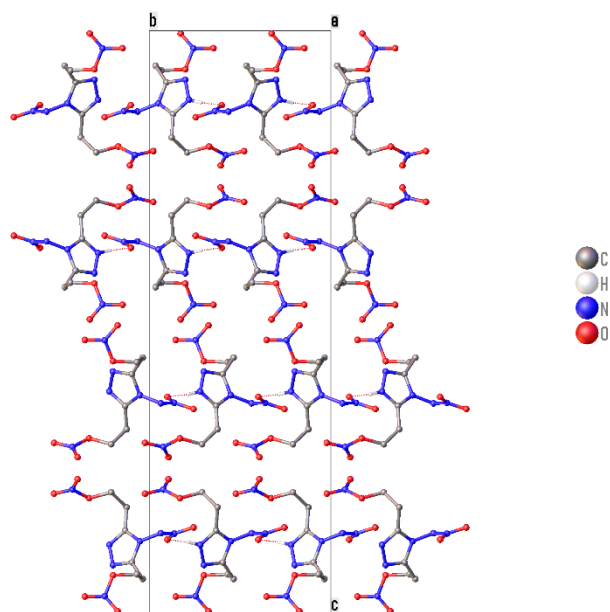

**Fig. S11.** Packing diagram of compound **6**.



**Table S11:** Bond Lengths in Å for compound **6**.

| Atom | Atom | Length/Å |
|------|------|----------|
| O1   | N5   | 1.265(2) |
| O2   | N5   | 1.236(2) |
| O3   | N6   | 1.382(2) |
| O3   | C4   | 1.448(2) |
| O4   | N6   | 1.206(2) |
| O5   | N6   | 1.200(2) |
| O6   | N7   | 1.396(2) |
| O6   | C6   | 1.449(3) |
| O7   | N7   | 1.197(2) |
| O8   | N7   | 1.204(2) |
| N1   | N2   | 1.373(2) |
| N1   | C1   | 1.308(3) |
| N2   | C2   | 1.306(2) |
| N3   | N4   | 1.412(2) |
| N3   | C1   | 1.344(2) |
| N3   | C2   | 1.377(2) |
| N4   | N5   | 1.336(2) |
| C1   | C3   | 1.479(3) |
| C2   | C5   | 1.490(3) |
| C3   | C4   | 1.521(3) |
| C5   | C6   | 1.527(3) |

**Table S12:** Bond Angles in ° for compound **6**.

| Atom | Atom | Atom | Angle/°    |
|------|------|------|------------|
| N6   | O3   | C4   | 113.64(15) |
| N7   | O6   | C6   | 114.91(15) |
| C1   | N1   | N2   | 112.62(16) |
| C2   | N2   | N1   | 103.95(15) |
| C1   | N3   | N4   | 126.22(16) |
| C1   | N3   | C2   | 107.35(15) |
| C2   | N3   | N4   | 126.09(15) |
| N5   | N4   | N3   | 107.71(14) |
| O1   | N5   | N4   | 121.58(15) |
| O2   | N5   | O1   | 121.50(15) |
| O2   | N5   | N4   | 116.90(15) |
| O4   | N6   | O3   | 118.39(16) |
| O5   | N6   | O3   | 113.60(17) |
| O5   | N6   | O4   | 128.01(18) |
| O7   | N7   | O6   | 118.52(18) |
| O7   | N7   | O8   | 129.0(2)   |
| O8   | N7   | O6   | 112.50(17) |
| N1   | C1   | N3   | 105.77(17) |
| N1   | C1   | C3   | 127.49(18) |
| N3   | C1   | C3   | 126.73(18) |
| N2   | C2   | N3   | 110.30(16) |
| N2   | C2   | C5   | 126.08(17) |
| N3   | C2   | C5   | 123.44(16) |
| C1   | C3   | C4   | 111.44(16) |

| Atom | Atom | Atom | Angle/°    |
|------|------|------|------------|
| O3   | C4   | C3   | 104.98(16) |
| C2   | C5   | C6   | 110.28(16) |
| O6   | C6   | C5   | 110.82(16) |

**Table S13:** Torsion Angles in ° for compound **6**.

| Atom | Atom | Atom | Atom | Angle/°     |
|------|------|------|------|-------------|
| N1   | N2   | C2   | N3   | -0.4(2)     |
| N1   | N2   | C2   | C5   | -175.67(18) |
| N1   | C1   | C3   | C4   | -75.7(3)    |
| N2   | N1   | C1   | N3   | -0.2(2)     |
| N2   | N1   | C1   | C3   | 178.39(18)  |
| N2   | C2   | C5   | C6   | 94.8(2)     |
| N3   | N4   | N5   | O1   | -3.0(2)     |
| N3   | N4   | N5   | O2   | 178.79(15)  |
| N3   | C1   | C3   | C4   | 102.7(2)    |
| N3   | C2   | C5   | C6   | -79.9(2)    |
| N4   | N3   | C1   | N1   | -173.61(16) |
| N4   | N3   | C1   | C3   | 7.8(3)      |
| N4   | N3   | C2   | N2   | 173.86(16)  |
| N4   | N3   | C2   | C5   | -10.7(3)    |
| N6   | O3   | C4   | C3   | -167.77(15) |
| N7   | O6   | C6   | C5   | -89.1(2)    |
| C1   | N1   | N2   | C2   | 0.4(2)      |
| C1   | N3   | N4   | N5   | 72.5(2)     |
| C1   | N3   | C2   | N2   | 0.3(2)      |
| C1   | N3   | C2   | C5   | 175.71(17)  |
| C1   | C3   | C4   | O3   | 71.6(2)     |
| C2   | N3   | N4   | N5   | -99.9(2)    |
| C2   | N3   | C1   | N1   | 0.0(2)      |
| C2   | N3   | C1   | C3   | -178.65(18) |
| C2   | C5   | C6   | O6   | -59.1(2)    |
| C4   | O3   | N6   | O4   | 3.1(2)      |
| C4   | O3   | N6   | O5   | -177.13(16) |
| C6   | O6   | N7   | O7   | -3.7(3)     |
| C6   | O6   | N7   | O8   | 176.29(17)  |

**Table S14:** Hydrogen Bond information for compound **6**.

| D  | H  | A               | d(D-H)/Å | d(H-A)/Å | d(D-A)/Å | D-H-A/deg |
|----|----|-----------------|----------|----------|----------|-----------|
| N1 | H1 | O1 <sup>1</sup> | 0.90(3)  | 1.79(3)  | 2.685(2) | 171(3)    |

<sup>1</sup>1/2-x,-1/2+y,

**Table S15.** Single crystal X-ray data and structure refinement for compound **11**.<sup>6-10</sup>

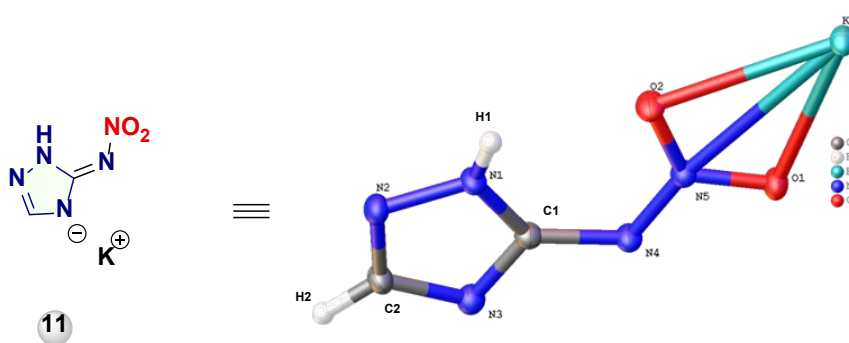

|                                                |                                                              |
|------------------------------------------------|--------------------------------------------------------------|
| Formula                                        | C <sub>2</sub> H <sub>2</sub> KN <sub>5</sub> O <sub>2</sub> |
| <i>D</i> <sub>calc.</sub> / g cm <sup>-3</sup> | 2.009                                                        |
| <i>m</i> /mm <sup>-1</sup>                     | 8.001                                                        |
| Formula Weight                                 | 167.19                                                       |
| Colour                                         | colourless                                                   |
| Shape                                          | irregular-shaped                                             |
| Size/mm <sup>3</sup>                           | 0.16×0.14×0.09                                               |
| <i>T</i> /K                                    | 100(2)                                                       |
| Crystal System                                 | monoclinic                                                   |
| Flack Parameter                                | -0.016(9)                                                    |
| Hooft Parameter                                | -0.011(4)                                                    |
| Space Group                                    | <i>P</i> 2 <sub>1</sub>                                      |
| <i>a</i> /Å                                    | 4.07223(5)                                                   |
| <i>b</i> /Å                                    | 10.00743(14)                                                 |
| <i>c</i> /Å                                    | 6.99455(9)                                                   |
| <i>α</i> /°                                    | 90                                                           |
| <i>β</i> /°                                    | 104.2041(13)                                                 |
| <i>γ</i> /°                                    | 90                                                           |
| <i>V</i> /Å <sup>3</sup>                       | 276.331(6)                                                   |
| <i>Z</i>                                       | 2                                                            |
| <i>Z</i> '                                     | 1                                                            |
| Wavelength/Å                                   | 1.54184                                                      |
| Radiation type                                 | Cu K <sub>α</sub>                                            |
| <i>Q</i> <sub>min</sub> /°                     | 6.528                                                        |
| <i>Q</i> <sub>max</sub> /°                     | 79.665                                                       |
| Measured Refl's.                               | 5570                                                         |
| Indep't Refl's                                 | 1123                                                         |
| Refl's I ≥ 2 <i>s</i> (I)                      | 1117                                                         |
| <i>R</i> <sub>int</sub>                        | 0.0280                                                       |
| Parameters                                     | 96                                                           |
| Restraints                                     | 1                                                            |
| Largest Peak                                   | 0.249                                                        |
| Deepest Hole                                   | -0.288                                                       |
| GooF                                           | 1.128                                                        |
| <i>wR</i> <sub>2</sub> (all data)              | 0.0708                                                       |
| <i>wR</i> <sub>2</sub>                         | 0.0707                                                       |
| <i>R</i> <sub>1</sub> (all data)               | 0.0254                                                       |
| <i>R</i> <sub>1</sub>                          | 0.0253                                                       |

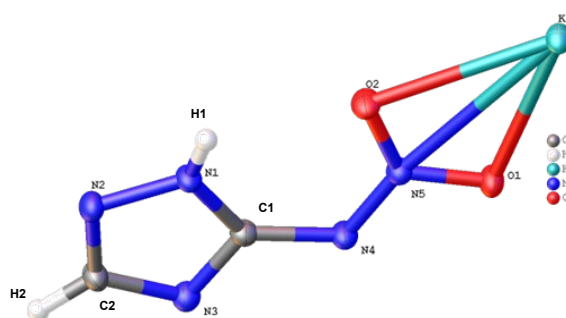

**Fig. S12.** Molecular structure (thermal ellipsoid plot (50%) of compound **11** (CCDC, 2296315).

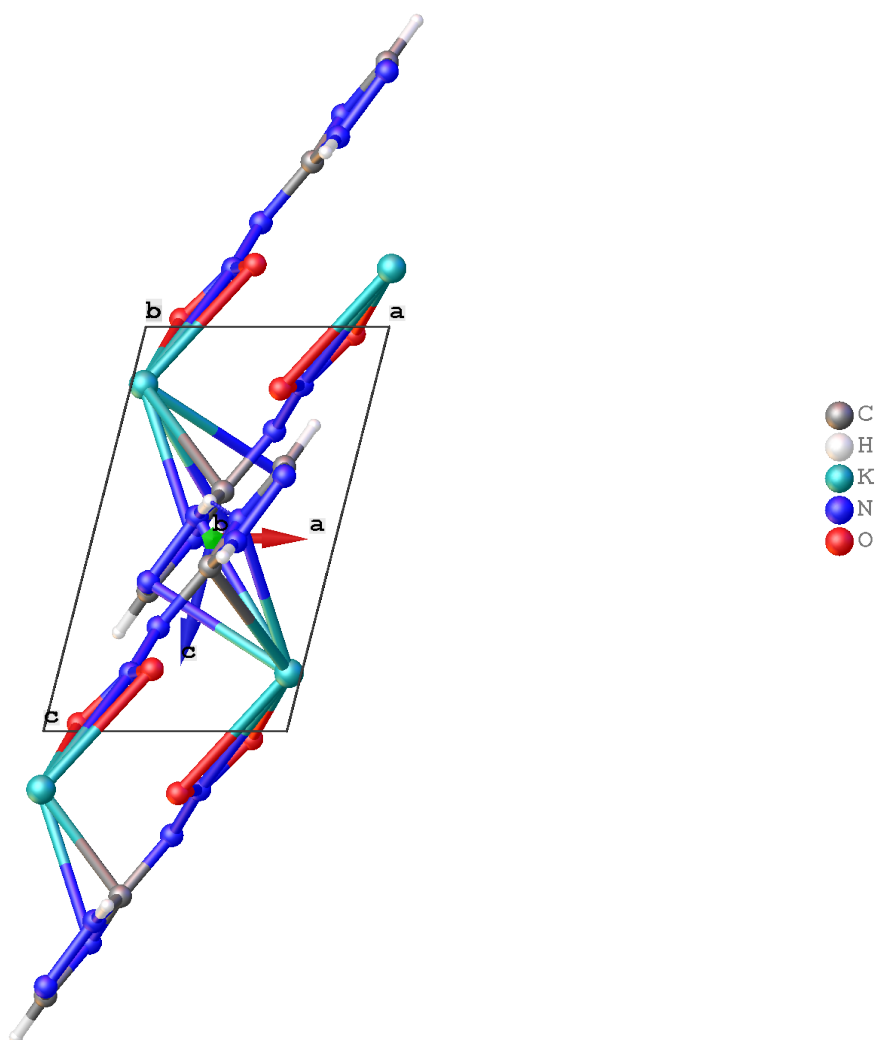

**Fig. S13.** Packing diagram of compound **11** viewed along the b axis

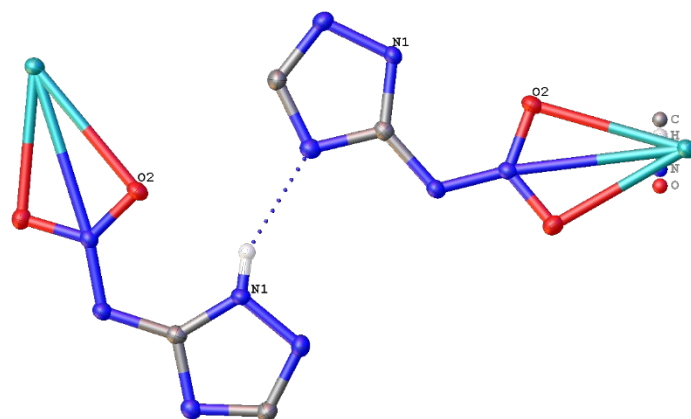

**Fig. S14.** The following hydrogen bonding interactions with a maximum D-D distance of 3.1 Å and a minimum angle of 110° are present in compound **11**: N1–O2: 2.624 Å, N1–N3\_I: 2.924 Å.

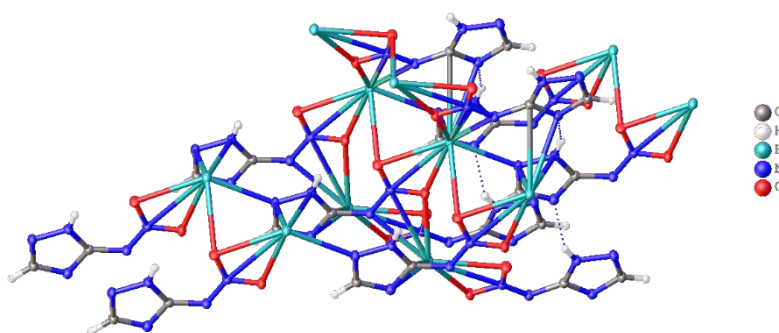

**Fig S15.** Drawing at 50% ellipsoids (compound **11**) showing the polymeric nature of the compound.

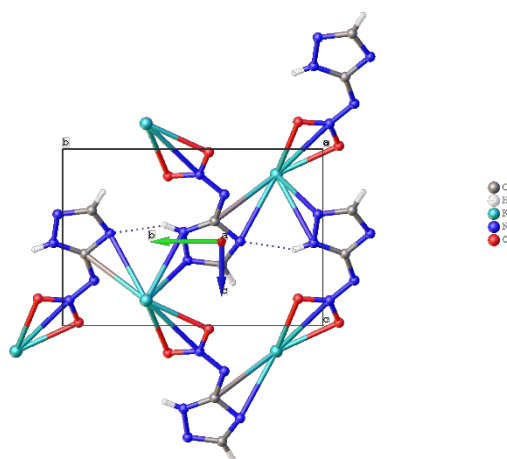

**Fig. S16.** Packing diagram of compound **11** viewed along the a axis

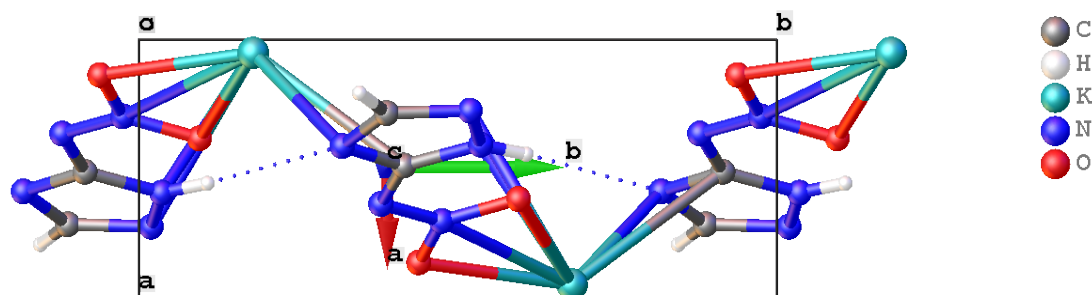

Fig. S17. Packing diagram of compound **11** viewed along the c axis

Table S16: Bond Lengths in Å for compound **11**.

| Atom | Atom            | Length/Å |
|------|-----------------|----------|
| K1   | O1              | 2.720(2) |
| K1   | O1 <sup>1</sup> | 2.788(2) |
| K1   | O2 <sup>2</sup> | 3.110(3) |
| K1   | O2              | 2.869(2) |
| K1   | N2 <sup>3</sup> | 3.232(3) |
| K1   | N2 <sup>4</sup> | 2.803(3) |
| K1   | N3 <sup>5</sup> | 3.035(3) |
| K1   | N4 <sup>1</sup> | 2.855(3) |
| K1   | N4 <sup>5</sup> | 3.063(3) |
| K1   | N5              | 3.197(3) |
| K1   | N5 <sup>1</sup> | 3.281(3) |
| K1   | C1 <sup>5</sup> | 3.247(3) |
| O1   | N5              | 1.268(3) |
| O2   | N5              | 1.258(4) |
| N1   | N2              | 1.374(3) |
| N1   | C1              | 1.345(4) |
| N2   | C2              | 1.318(5) |
| N3   | C1              | 1.342(4) |
| N3   | C2              | 1.353(4) |
| N4   | N5              | 1.312(4) |
| N4   | C1              | 1.384(4) |

<sup>1</sup>2-x,1/2+y,-z; <sup>2</sup>1+x,+y,+z; <sup>3</sup>+x,+y,-1+z; <sup>4</sup>1+x,+y,-1+z; <sup>5</sup>1-x,1/2+y,-z

Table S17: Bond Angles in ° for compound **11**.

| Atom            | Atom | Atom            | Angle/°   |
|-----------------|------|-----------------|-----------|
| O1              | K1   | O1 <sup>1</sup> | 138.31(2) |
| O1 <sup>1</sup> | K1   | O2              | 100.81(7) |
| O1              | K1   | O2              | 46.08(7)  |
| O1 <sup>1</sup> | K1   | O2 <sup>2</sup> | 85.06(7)  |
| O1              | K1   | O2 <sup>2</sup> | 70.25(6)  |
| O1 <sup>1</sup> | K1   | N2 <sup>3</sup> | 125.28(8) |
| O1              | K1   | N2 <sup>4</sup> | 65.46(7)  |
| O1 <sup>1</sup> | K1   | N2 <sup>4</sup> | 138.62(7) |
| O1              | K1   | N2 <sup>3</sup> | 81.73(8)  |
| O1              | K1   | N3 <sup>5</sup> | 133.36(7) |
| O1 <sup>1</sup> | K1   | N3 <sup>5</sup> | 83.31(7)  |

| Atom            | Atom | Atom            | Angle <sup>o</sup> |
|-----------------|------|-----------------|--------------------|
| O1 <sup>1</sup> | K1   | N4 <sup>1</sup> | 45.44(7)           |
| O1              | K1   | N4 <sup>5</sup> | 121.00(7)          |
| O1              | K1   | N4 <sup>1</sup> | 151.84(7)          |
| O1 <sup>1</sup> | K1   | N4 <sup>5</sup> | 67.00(7)           |
| O1 <sup>1</sup> | K1   | N5 <sup>1</sup> | 22.26(6)           |
| O1 <sup>1</sup> | K1   | N5              | 120.16(7)          |
| O1              | K1   | N5 <sup>1</sup> | 153.85(6)          |
| O1              | K1   | N5              | 22.97(7)           |
| O1              | K1   | C1 <sup>5</sup> | 140.61(7)          |
| O1 <sup>1</sup> | K1   | C1 <sup>5</sup> | 64.58(7)           |
| O2              | K1   | O2 <sup>2</sup> | 85.76(6)           |
| O2 <sup>2</sup> | K1   | N2 <sup>4</sup> | 133.67(7)          |
| O2              | K1   | N2 <sup>4</sup> | 73.43(7)           |
| O2              | K1   | N3 <sup>5</sup> | 123.68(7)          |
| O2              | K1   | N4 <sup>5</sup> | 84.58(7)           |
| O2 <sup>2</sup> | K1   | N5              | 76.36(6)           |
| O2              | K1   | N5 <sup>1</sup> | 123.05(7)          |
| O2 <sup>2</sup> | K1   | N5 <sup>1</sup> | 86.35(6)           |
| O2              | K1   | N5              | 23.12(7)           |
| O2              | K1   | C1 <sup>5</sup> | 109.67(7)          |
| O2 <sup>2</sup> | K1   | C1 <sup>5</sup> | 147.66(7)          |
| N2 <sup>3</sup> | K1   | O2              | 127.77(8)          |
| N2 <sup>3</sup> | K1   | O2 <sup>2</sup> | 76.25(7)           |
| N2 <sup>3</sup> | K1   | N2 <sup>4</sup> | 84.55(7)           |
| N2 <sup>3</sup> | K1   | N3 <sup>5</sup> | 88.10(7)           |
| N2 <sup>3</sup> | K1   | N4 <sup>1</sup> | 81.32(8)           |
| N2 <sup>3</sup> | K1   | N4 <sup>5</sup> | 132.41(8)          |
| N2 <sup>3</sup> | K1   | N5 <sup>1</sup> | 104.48(8)          |
| N2 <sup>3</sup> | K1   | N5              | 104.70(8)          |
| N2 <sup>4</sup> | K1   | N5 <sup>1</sup> | 139.66(7)          |
| N2 <sup>3</sup> | K1   | C1 <sup>5</sup> | 111.45(8)          |
| N2 <sup>4</sup> | K1   | C1 <sup>5</sup> | 78.63(7)           |
| N3 <sup>5</sup> | K1   | O2 <sup>2</sup> | 149.90(7)          |
| N3 <sup>5</sup> | K1   | N2 <sup>4</sup> | 68.34(7)           |
| N3 <sup>5</sup> | K1   | N4 <sup>5</sup> | 45.13(7)           |
| N3 <sup>5</sup> | K1   | N5 <sup>1</sup> | 72.70(7)           |
| N3 <sup>5</sup> | K1   | N5              | 133.13(7)          |
| N3 <sup>5</sup> | K1   | C1 <sup>5</sup> | 24.37(7)           |
| N4 <sup>5</sup> | K1   | O2 <sup>2</sup> | 148.00(7)          |
| N4 <sup>1</sup> | K1   | O2              | 145.40(7)          |
| N4 <sup>1</sup> | K1   | O2 <sup>2</sup> | 83.96(7)           |
| N4 <sup>1</sup> | K1   | N2 <sup>4</sup> | 134.51(7)          |
| N45             | K1   | N24             | 71.65(8)           |
| N41             | K1   | N35             | 68.18(7)           |
| N41             | K1   | N45             | 86.89(8)           |
| N41             | K1   | N5              | 157.16(7)          |
| N41             | K1   | N51             | 23.40(7)           |
| N45             | K1   | N51             | 73.74(7)           |
| N45             | K1   | N5              | 103.71(7)          |
| N41             | K1   | C15             | 67.09(8)           |
| N45             | K1   | C15             | 25.12(7)           |
| N5              | K1   | N24             | 68.33(7)           |
| N5              | K1   | N51             | 141.18(4)          |

| Atom | Atom | Atom | Angle <sup>o</sup> |
|------|------|------|--------------------|
| N5   | K1   | C15  | 127.64(7)          |
| C15  | K1   | N51  | 61.35(7)           |
| K1   | O1   | K16  | 154.46(8)          |
| N5   | O1   | K16  | 101.32(17)         |
| N5   | O1   | K1   | 100.16(18)         |
| K1   | O2   | K17  | 85.76(6)           |
| N5   | O2   | K17  | 115.51(18)         |
| N5   | O2   | K1   | 93.24(17)          |
| N2   | N1   | K18  | 72.55(16)          |
| C1   | N1   | K18  | 118.41(19)         |
| C1   | N1   | N2   | 109.3(3)           |
| K19  | N2   | K18  | 84.55(7)           |
| N1   | N2   | K18  | 83.52(18)          |
| N1   | N2   | K19  | 136.8(2)           |
| C2   | N2   | K18  | 116.0(2)           |
| C2   | N2   | K19  | 120.2(2)           |
| C2   | N2   | N1   | 102.3(3)           |
| C1   | N3   | K110 | 86.71(17)          |
| C1   | N3   | C2   | 102.5(3)           |
| C2   | N3   | K110 | 130.1(2)           |
| K16  | N4   | K110 | 86.90(8)           |
| N5   | N4   | K110 | 125.60(18)         |
| N5   | N4   | K16  | 96.85(17)          |
| N5   | N4   | C1   | 117.5(3)           |
| C1   | N4   | K16  | 142.5(2)           |
| C1   | N4   | K110 | 84.89(17)          |
| K1   | N5   | K16  | 112.01(7)          |
| O1   | N5   | K1   | 56.86(15)          |
| O1   | N5   | K16  | 56.41(15)          |
| O1   | N5   | N4   | 115.3(3)           |
| O2   | N5   | K1   | 63.63(15)          |
| O2   | N5   | K16  | 170.67(19)         |
| O2   | N5   | O1   | 120.4(3)           |
| O2   | N5   | N4   | 124.3(3)           |
| N4   | N5   | K1   | 171.63(19)         |
| N4   | N5   | K16  | 59.75(15)          |
| N1   | C1   | K110 | 133.6(2)           |
| N1   | C1   | N4   | 131.6(3)           |
| N3   | C1   | K110 | 68.93(17)          |
| N3   | C1   | N1   | 110.1(3)           |
| N3   | C1   | N4   | 118.3(3)           |
| N4   | C1   | K110 | 69.99(16)          |
| N2   | C2   | N3   | 115.7(3)           |

<sup>1</sup>2-x,1/2+y,-z; <sup>2</sup>1+x,+y,+z; <sup>3</sup>1+x,+y,-1+z; <sup>4</sup>+x,+y,-1+z; <sup>5</sup>1-x,1/2+y,-z;  
<sup>6</sup>2-x,-1/2+y,-z; <sup>7</sup>-1+x,+y,+z; <sup>8</sup>+x,+y,1+z; <sup>9</sup>-1+x,+y,1+z; <sup>10</sup>1-x,-1/2+y,-z

**Table S18:** Hydrogen Bond information for compound 11.

| D  | H  | A               | d(D-H)/Å | d(H-A)/Å | d(D-A)/Å | D-H-A/deg |
|----|----|-----------------|----------|----------|----------|-----------|
| N1 | H1 | O2              | 0.79(6)  | 2.23(5)  | 2.624(4) | 111(4)    |
| N1 | H1 | N3 <sup>1</sup> | 0.79(6)  | 2.20(6)  | 2.924(4) | 153(5)    |

<sup>1</sup>1-x,1/2+y,1-z



**Table S19:** Torsion Angles in ° for compound **11**.

| Atom            | Atom | Atom | Atom            | Angle/°     |
|-----------------|------|------|-----------------|-------------|
| K1              | O1   | N5   | K1 <sup>1</sup> | -166.10(13) |
| K1 <sup>1</sup> | O1   | N5   | K1              | 166.10(13)  |
| K1              | O1   | N5   | O2              | 3.5(3)      |
| K1 <sup>1</sup> | O1   | N5   | O2              | 169.6(2)    |
| K1 <sup>1</sup> | O1   | N5   | N4              | -10.4(3)    |
| K1              | O1   | N5   | N4              | -176.5(2)   |
| K1 <sup>2</sup> | O2   | N5   | K1              | 86.84(12)   |
| K1              | O2   | N5   | O1              | -3.3(3)     |
| K1 <sup>2</sup> | O2   | N5   | O1              | 83.5(3)     |
| K1              | O2   | N5   | N4              | 176.8(2)    |
| K1 <sup>2</sup> | O2   | N5   | N4              | -96.4(3)    |
| K1 <sup>3</sup> | N1   | N2   | K1 <sup>4</sup> | 74.9(2)     |
| K1 <sup>3</sup> | N1   | N2   | C2              | -115.2(2)   |
| K1 <sup>3</sup> | N1   | C1   | K1 <sup>5</sup> | 160.16(14)  |
| K1 <sup>3</sup> | N1   | C1   | N3              | 80.5(3)     |
| K1 <sup>3</sup> | N1   | C1   | N4              | -97.5(3)    |
| K1 <sup>4</sup> | N2   | C2   | N3              | 172.46(19)  |
| K1 <sup>3</sup> | N2   | C2   | N3              | -88.3(3)    |
| K1 <sup>5</sup> | N3   | C1   | N1              | 130.3(2)    |
| K1 <sup>5</sup> | N3   | C1   | N4              | -51.4(3)    |
| K1 <sup>5</sup> | N3   | C2   | N2              | -96.5(3)    |
| K1 <sup>5</sup> | N4   | N5   | K1 <sup>1</sup> | -91.08(18)  |
| K1 <sup>5</sup> | N4   | N5   | O1              | -81.0(3)    |
| K1 <sup>1</sup> | N4   | N5   | O1              | 10.0(2)     |
| K1 <sup>5</sup> | N4   | N5   | O2              | 98.9(3)     |
| K1 <sup>1</sup> | N4   | N5   | O2              | -170.0(2)   |
| K1 <sup>1</sup> | N4   | C1   | K1 <sup>5</sup> | -78.1(3)    |
| K1 <sup>5</sup> | N4   | C1   | N1              | -131.2(3)   |
| K1 <sup>1</sup> | N4   | C1   | N1              | 150.7(3)    |
| K1 <sup>5</sup> | N4   | C1   | N3              | 50.9(3)     |
| K1 <sup>1</sup> | N4   | C1   | N3              | -27.2(5)    |
| N1              | N2   | C2   | N3              | 0.4(4)      |
| N2              | N1   | C1   | K1 <sup>5</sup> | 80.0(3)     |
| N2              | N1   | C1   | N3              | 0.4(3)      |
| N2              | N1   | C1   | N4              | -177.6(3)   |
| N5              | N4   | C1   | K1 <sup>5</sup> | 127.8(3)    |
| N5              | N4   | C1   | N1              | -3.4(5)     |
| N5              | N4   | C1   | N3              | 178.7(3)    |
| C1              | N1   | N2   | K1 <sup>3</sup> | 114.7(2)    |
| C1              | N1   | N2   | K1 <sup>4</sup> | -170.4(2)   |
| C1              | N1   | N2   | C2              | -0.5(3)     |
| C1              | N3   | C2   | N2              | -0.2(4)     |
| C1              | N4   | N5   | K1 <sup>1</sup> | 164.5(3)    |
| C1              | N4   | N5   | O1              | 174.5(2)    |
| C1              | N4   | N5   | O2              | -5.6(4)     |
| C2              | N3   | C1   | K1 <sup>5</sup> | -130.4(2)   |
| C2              | N3   | C1   | N1              | -0.1(3)     |

| <b>Atom</b> | <b>Atom</b> | <b>Atom</b> | <b>Atom</b> | <b>Angle/°</b> |
|-------------|-------------|-------------|-------------|----------------|
| C2          | N3          | C1          | N4          | 178.2(3)       |

**Table S20.** Single crystal X-ray data and structure refinement for compound **14**.<sup>6-10</sup>

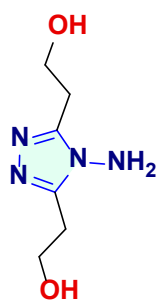

14

≡

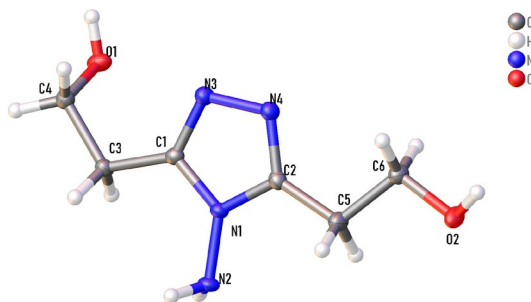

|                                                |                                                              |
|------------------------------------------------|--------------------------------------------------------------|
| Formula                                        | C <sub>6</sub> H <sub>12</sub> N <sub>4</sub> O <sub>2</sub> |
| <i>D</i> <sub>calc.</sub> / g cm <sup>-3</sup> | 1.428                                                        |
| <i>m</i> /mm <sup>-1</sup>                     | 0.923                                                        |
| Formula Weight                                 | 172.20                                                       |
| Color                                          | colourless                                                   |
| Shape                                          | block-shaped                                                 |
| Size/mm <sup>3</sup>                           | 0.24×0.19×0.06                                               |
| <i>T</i> /K                                    | 99.99(10)                                                    |
| Crystal System                                 | monoclinic                                                   |
| Space Group                                    | <i>P</i> 2 <sub>1</sub> / <i>n</i>                           |
| <i>a</i> /Å                                    | 7.80690(8)                                                   |
| <i>b</i> /Å                                    | 5.75687(6)                                                   |
| <i>c</i> /Å                                    | 17.86698(18)                                                 |
| <i>a</i> <sup>o</sup>                          | 90                                                           |
| <i>b</i> <sup>o</sup>                          | 94.2689(9)                                                   |
| <i>g</i> <sup>o</sup>                          | 90                                                           |
| <i>V</i> /Å <sup>3</sup>                       | 800.773(14)                                                  |
| <i>Z</i>                                       | 4                                                            |
| <i>Z</i> '                                     | 1                                                            |
| Wavelength/Å                                   | 1.54184                                                      |
| Radiation type                                 | Cu K <sub>α</sub>                                            |
| <i>Q</i> <sub>min</sub> <sup>o</sup>           | 4.964                                                        |
| <i>Q</i> <sub>max</sub> <sup>o</sup>           | 76.992                                                       |
| Measured Refl's.                               | 7110                                                         |
| Indep't Refl's                                 | 1607                                                         |
| Refl's I <sub>≥2</sub> <i>s</i> (I)            | 1532                                                         |
| <i>R</i> <sub>int</sub>                        | 0.0245                                                       |
| Parameters                                     | 125                                                          |
| Restraints                                     | 0                                                            |
| Largest Peak                                   | 0.205                                                        |
| Deepest Hole                                   | -0.266                                                       |
| GooF                                           | 1.074                                                        |
| <i>wR</i> <sub>2</sub> (all data)              | 0.0820                                                       |
| <i>wR</i> <sub>2</sub>                         | 0.0812                                                       |
| <i>R</i> <sub>1</sub> (all data)               | 0.0335                                                       |
| <i>R</i> <sub>1</sub>                          | 0.0325                                                       |

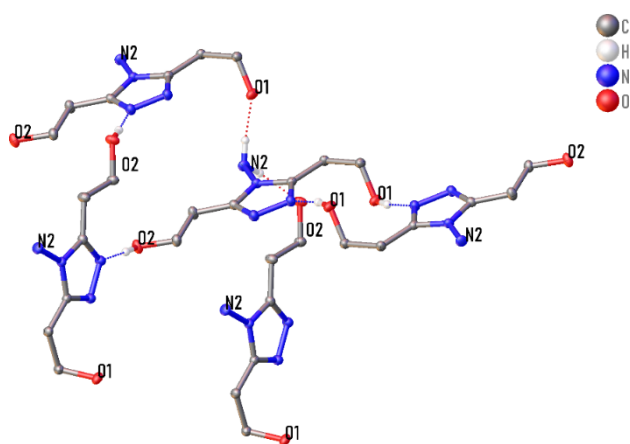

**Fig. S18.** The following hydrogen bonding interactions with a maximum D-D distance of 3.1 Å and a minimum angle of 110° are present in compound **14**: O1–N3\_4: 2.765 Å, O2–N4\_1: 2.769 Å, N2–O1\_2: 2.926 Å, N2–O2\_3: 2.952 Å.

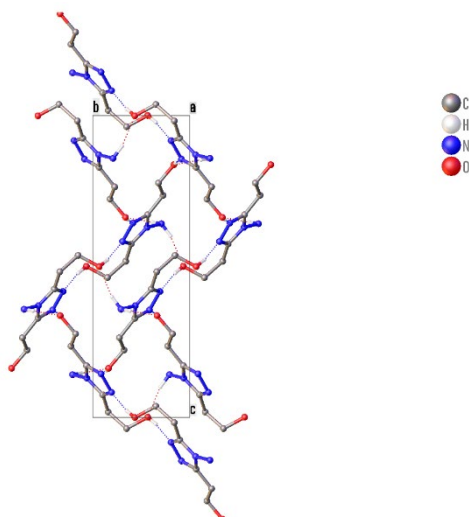

**Fig. S19.** Packing diagram of compound **14**.

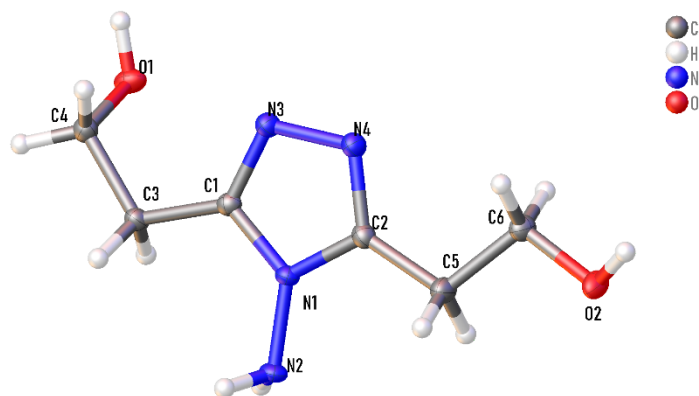

**Fig. S20.** Molecular structure (thermal ellipsoid plot (50%)) of compound **14** (CCDC, 2296316).

**Table S21:** Bond Lengths in Å for compound 14.

| Atom | Atom | Length/Å   |
|------|------|------------|
| O1   | C4   | 1.4194(13) |
| O2   | C6   | 1.4241(13) |
| N1   | N2   | 1.4099(12) |
| N1   | C1   | 1.3695(14) |
| N1   | C2   | 1.3621(13) |
| N3   | N4   | 1.3974(12) |
| N3   | C1   | 1.3106(14) |
| N4   | C2   | 1.3086(14) |
| C1   | C3   | 1.4922(14) |
| C2   | C5   | 1.4889(15) |
| C3   | C4   | 1.5181(15) |
| C5   | C6   | 1.5128(15) |

**Table S22:** Bond Angles in ° for compound 14.

| Atom | Atom | Atom | Angle/°    |
|------|------|------|------------|
| C1   | N1   | N2   | 129.16(9)  |
| C2   | N1   | N2   | 124.15(9)  |
| C2   | N1   | C1   | 106.63(9)  |
| C1   | N3   | N4   | 107.56(9)  |
| C2   | N4   | N3   | 107.69(8)  |
| N1   | C1   | C3   | 123.12(9)  |
| N3   | C1   | N1   | 108.94(9)  |
| N3   | C1   | C3   | 127.94(10) |
| N1   | C2   | C5   | 123.45(9)  |
| N4   | C2   | N1   | 109.18(9)  |
| N4   | C2   | C5   | 127.36(10) |
| C1   | C3   | C4   | 113.45(9)  |
| O1   | C4   | C3   | 110.09(9)  |
| C2   | C5   | C6   | 111.95(9)  |
| O2   | C6   | C5   | 108.78(9)  |

**Table S23:** Torsion Angles in ° for compound 14.

| Atom | Atom | Atom | Atom | Angle/°     |
|------|------|------|------|-------------|
| N1   | C1   | C3   | C4   | -179.37(9)  |
| N1   | C2   | C5   | C6   | 174.30(10)  |
| N2   | N1   | C1   | N3   | 177.12(10)  |
| N2   | N1   | C1   | C3   | -2.67(17)   |
| N2   | N1   | C2   | N4   | -177.30(9)  |
| N2   | N1   | C2   | C5   | 1.41(16)    |
| N3   | N4   | C2   | N1   | -0.02(12)   |
| N3   | N4   | C2   | C5   | -178.67(10) |
| N3   | C1   | C3   | C4   | 0.88(16)    |
| N4   | N3   | C1   | N1   | 0.02(12)    |
| N4   | N3   | C1   | C3   | 179.80(10)  |
| N4   | C2   | C5   | C6   | -7.23(16)   |
| C1   | N1   | C2   | N4   | 0.03(12)    |
| C1   | N1   | C2   | C5   | 178.74(10)  |
| C1   | N3   | N4   | C2   | 0.00(12)    |
| C1   | C3   | C4   | O1   | 70.24(12)   |
| C2   | N1   | C1   | N3   | -0.03(12)   |
| C2   | N1   | C1   | C3   | -179.83(10) |
| C2   | C5   | C6   | O2   | 179.65(9)   |

**Table S24:** Hydrogen Bond information for compound 14.

| D  | H   | A               | d(D-H)/Å  | d(H-A)/Å  | d(D-A)/Å   | D-H-A/deg |
|----|-----|-----------------|-----------|-----------|------------|-----------|
| O1 | H1  | N3 <sup>1</sup> | 0.881(19) | 1.891(19) | 2.7653(12) | 171.3(17) |
| O2 | H2  | N4 <sup>2</sup> | 0.869(19) | 1.901(19) | 2.7686(12) | 176.9(16) |
| N2 | H2A | O2 <sup>3</sup> | 0.909(16) | 2.068(16) | 2.9519(13) | 163.8(14) |
| N2 | H2B | O1 <sup>4</sup> | 0.906(17) | 2.116(16) | 2.9264(13) | 148.5(14) |

<sup>1</sup>1-x,2-y,1-z; <sup>2</sup>3/2-x,-1/2+y,1/2-z; <sup>3</sup>1/2-x,1/2+y,1/2-z; <sup>4</sup>+x,-1+y,+z

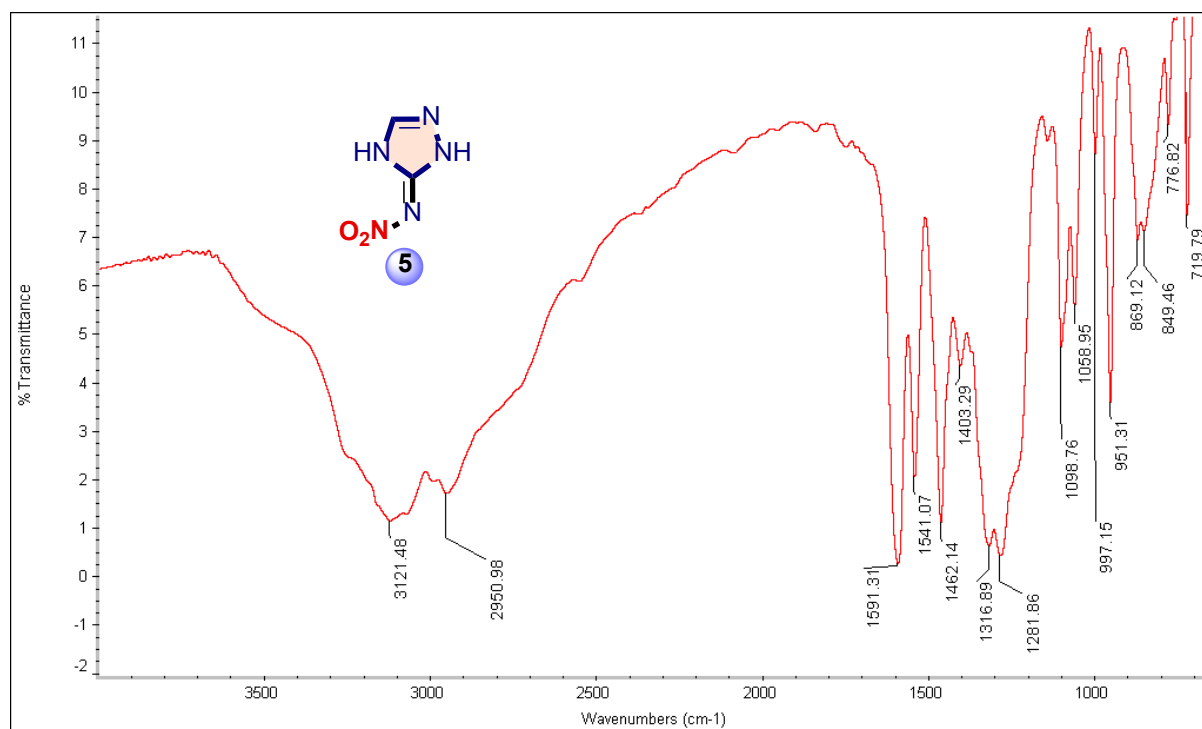

**Fig. S21.** FTIR-Spectrum of Compound 5.

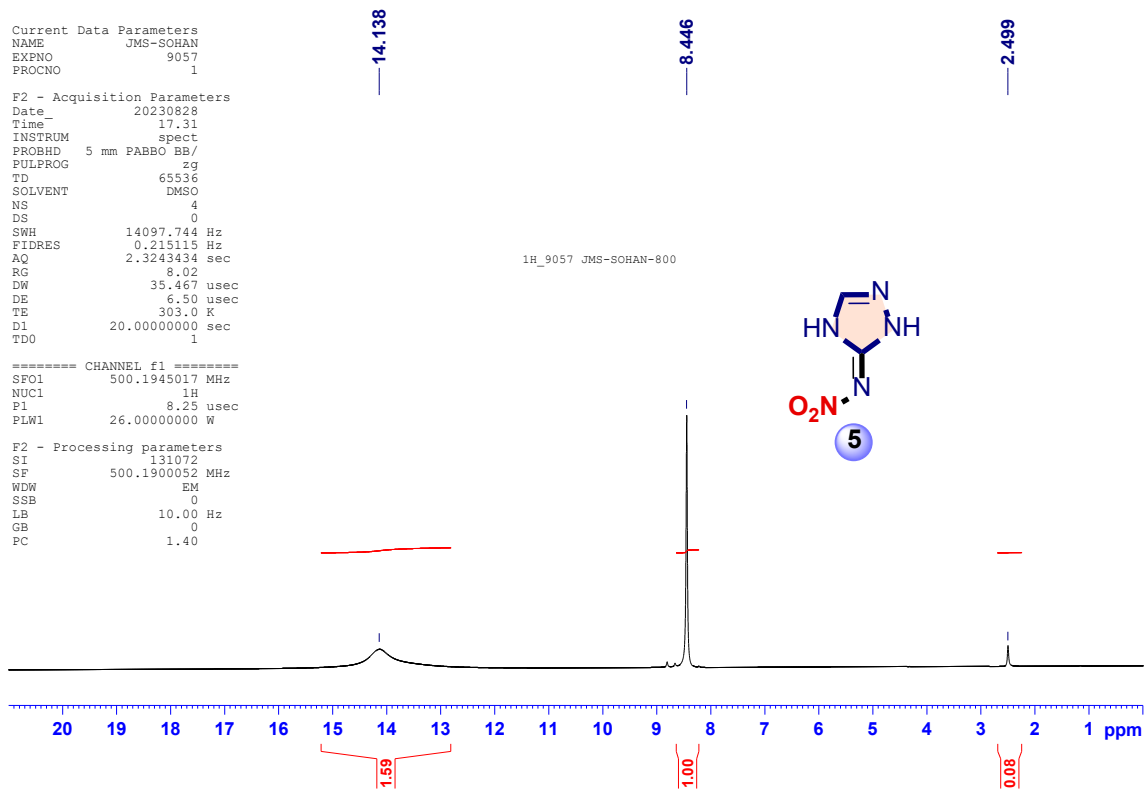

Fig. S22.  $^1\text{H}$  NMR Spectrum of Compound 5 (500.19 MHz).

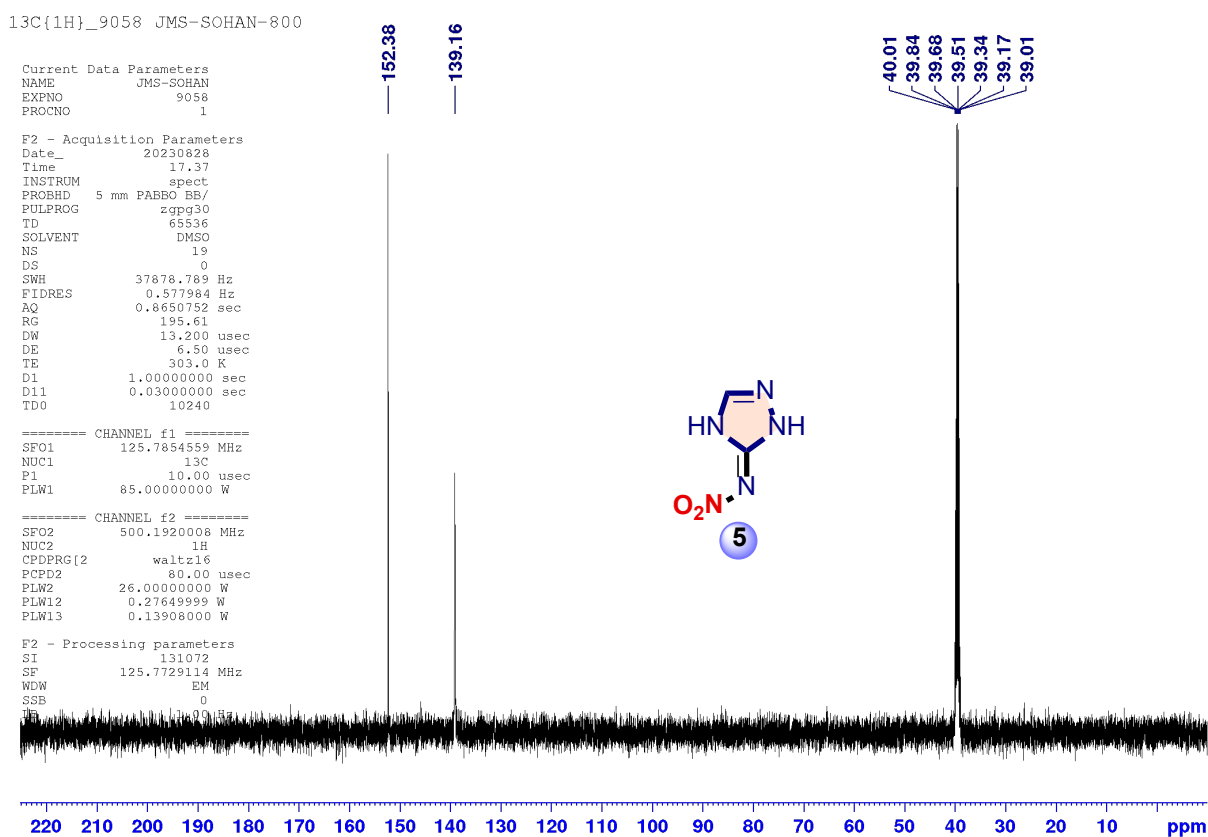

Fig. S23.  $^{13}\text{C}$  NMR Spectrum of Compound 5 (125.77 MHz).

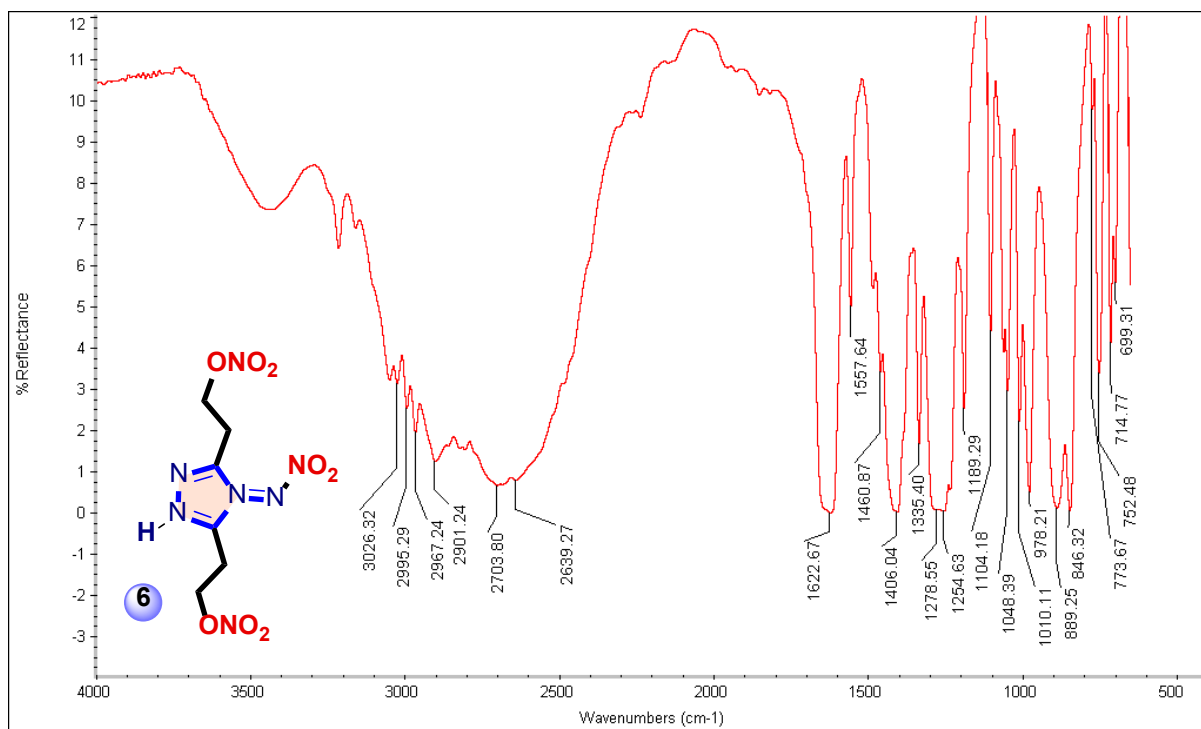

Fig. S24. FTIR-Spectrum of Compound 6.

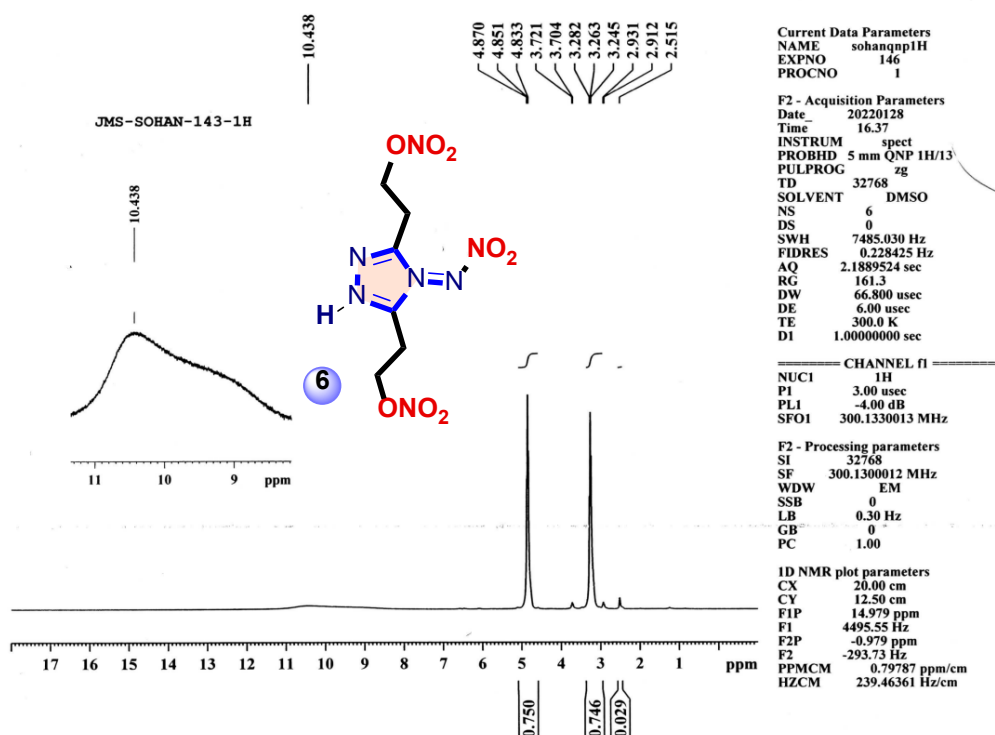

Fig. S25. <sup>1</sup>H NMR Spectrum of Compound 6 (300.13 MHz).



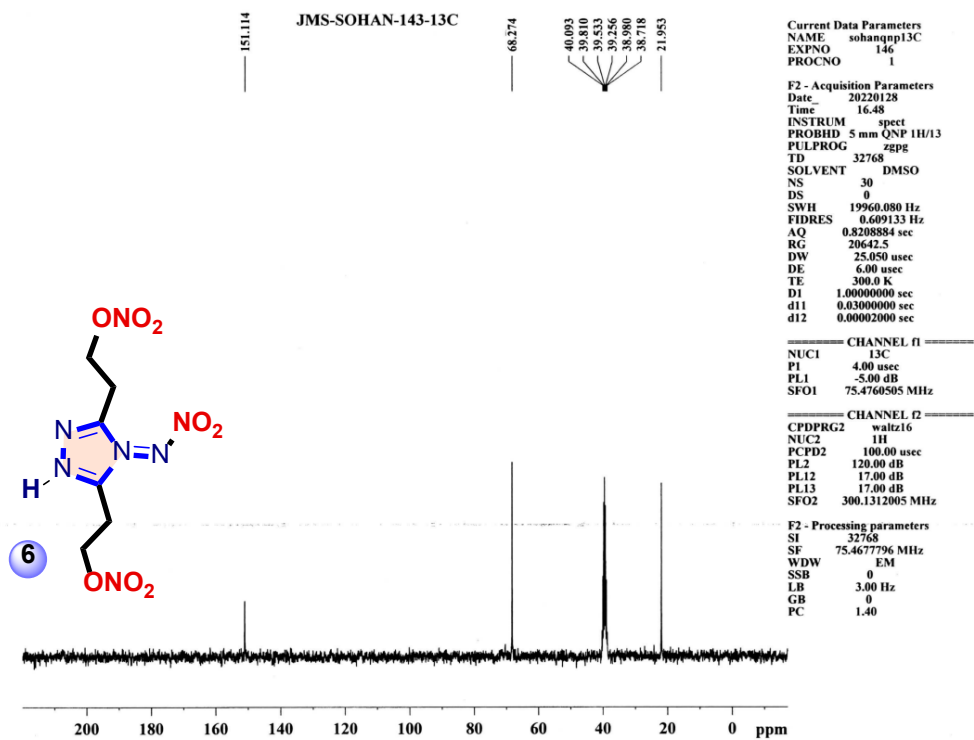

Fig. S26.  $^{13}\text{C}$  NMR Spectrum of Compound 6 (100.00 MHz).

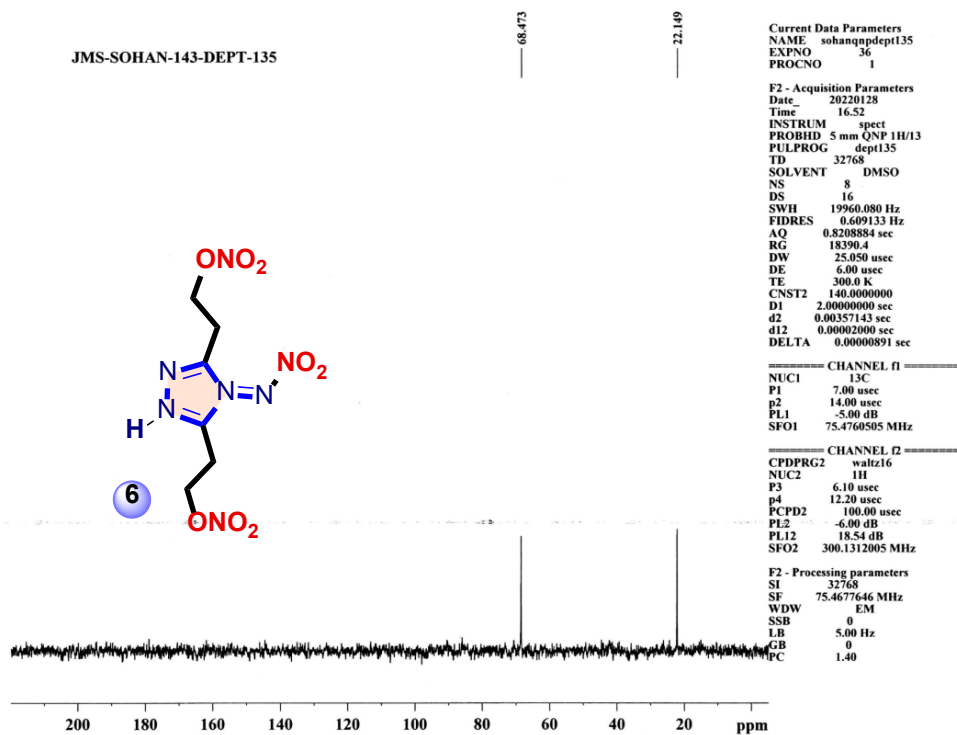

Fig. S27.  $^{13}\text{C}$ -DEPT NMR Spectrum of Compound 6 (100.00 MHz).

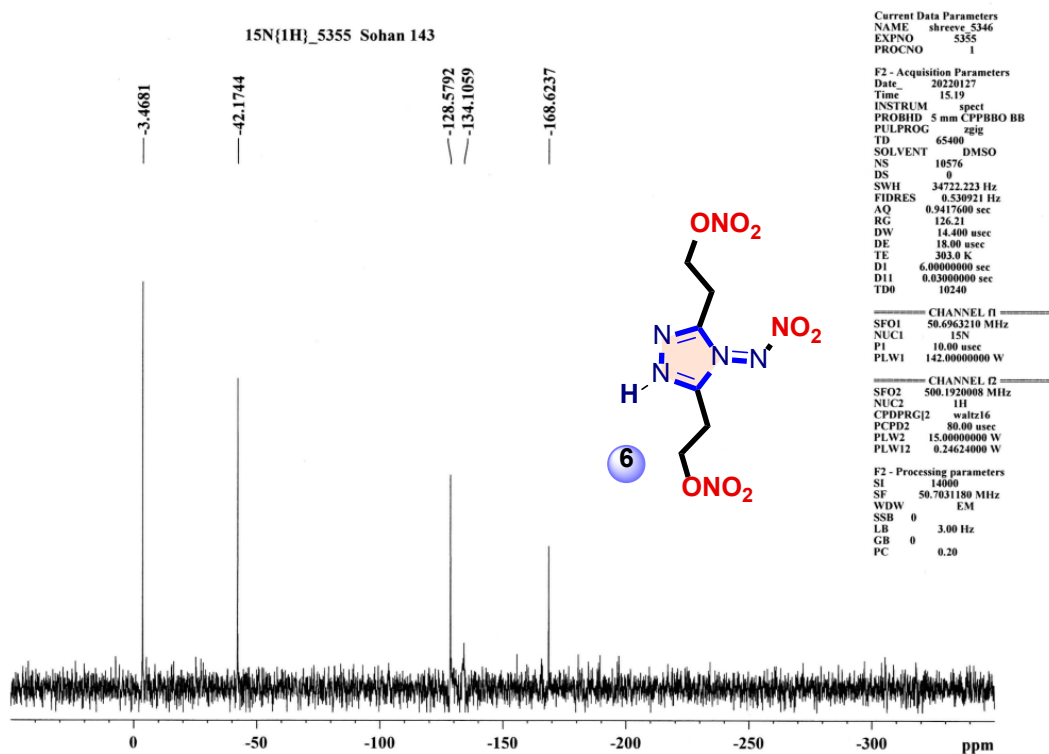

Fig. S28. <sup>1</sup>H NMR Spectrum of Compound 6 (500.19 MHz).

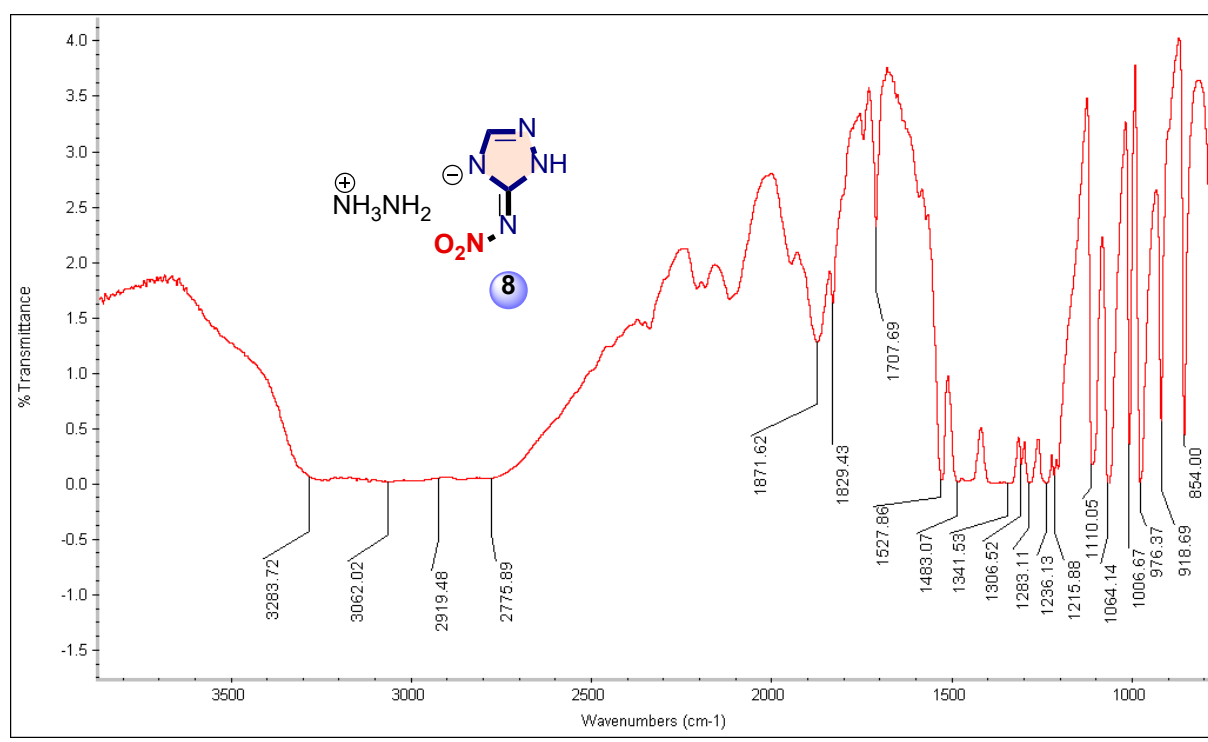

Fig. S29. FTIR-Spectrum of Compound 8.

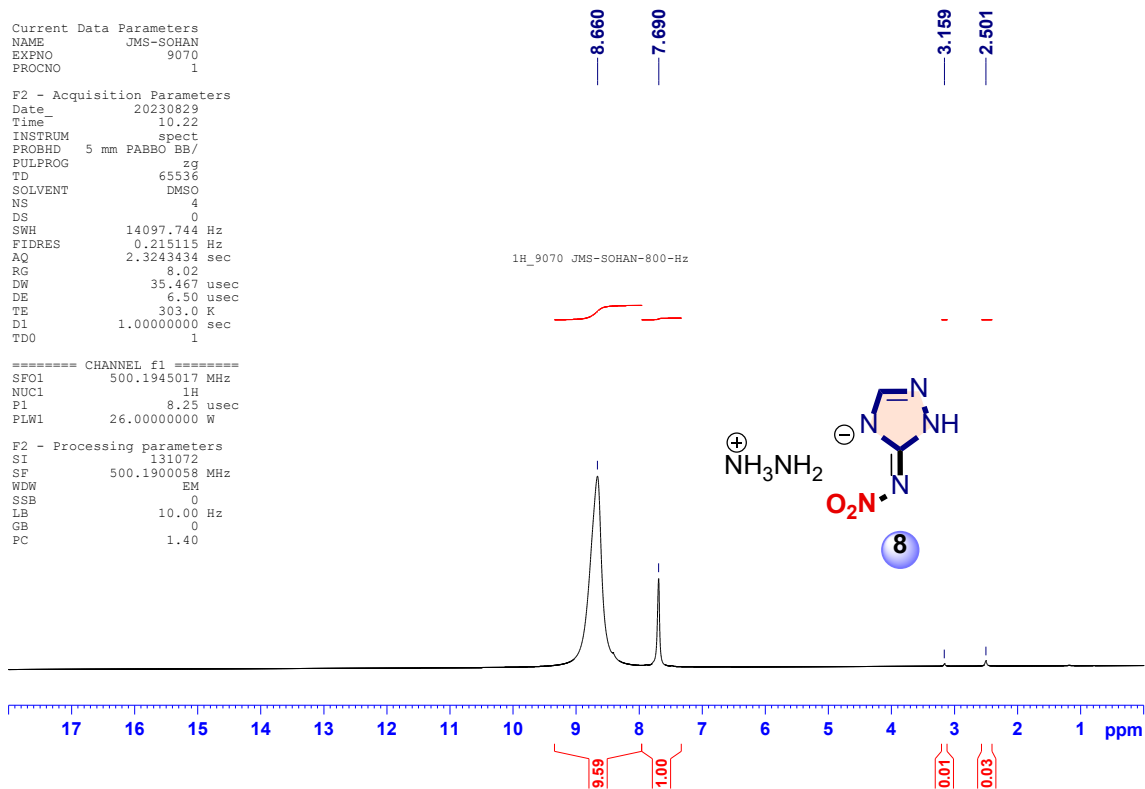

Fig. S30.  $^1\text{H}$  NMR Spectrum of Compound **8** (500.19 MHz).

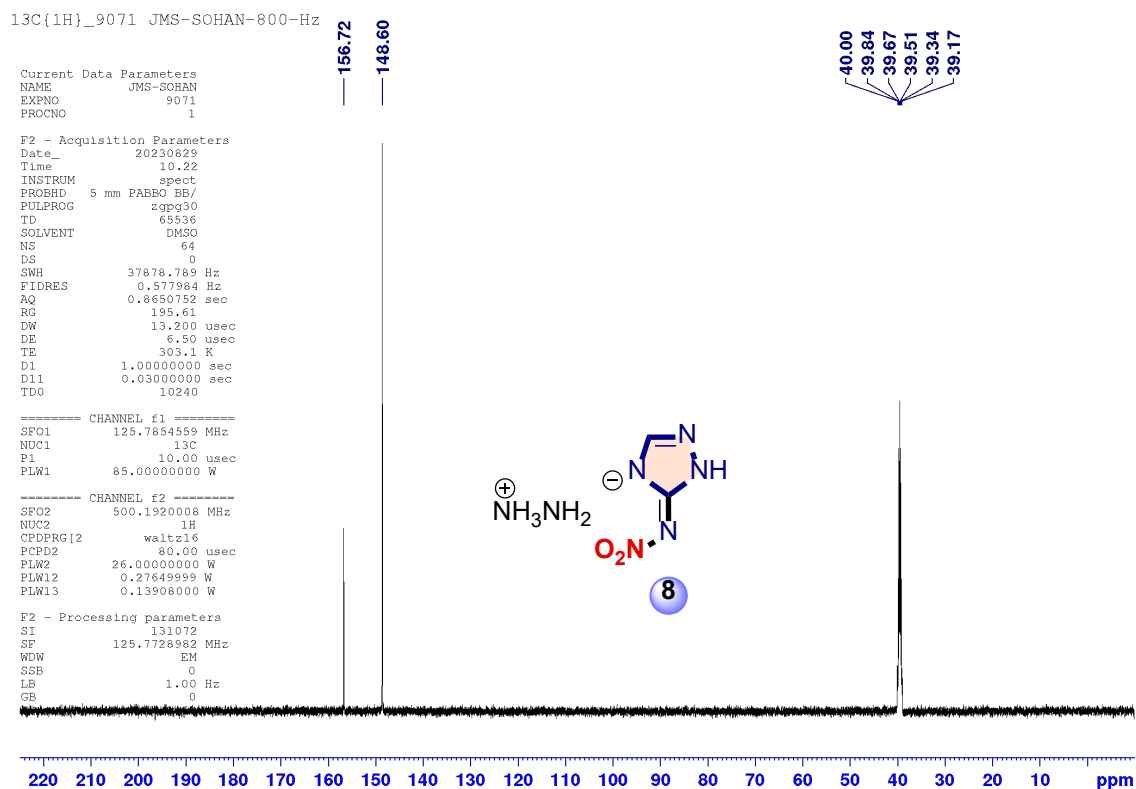

Fig. S31.  $^{13}\text{C}$  NMR Spectrum of Compound **8** (125.77 MHz).

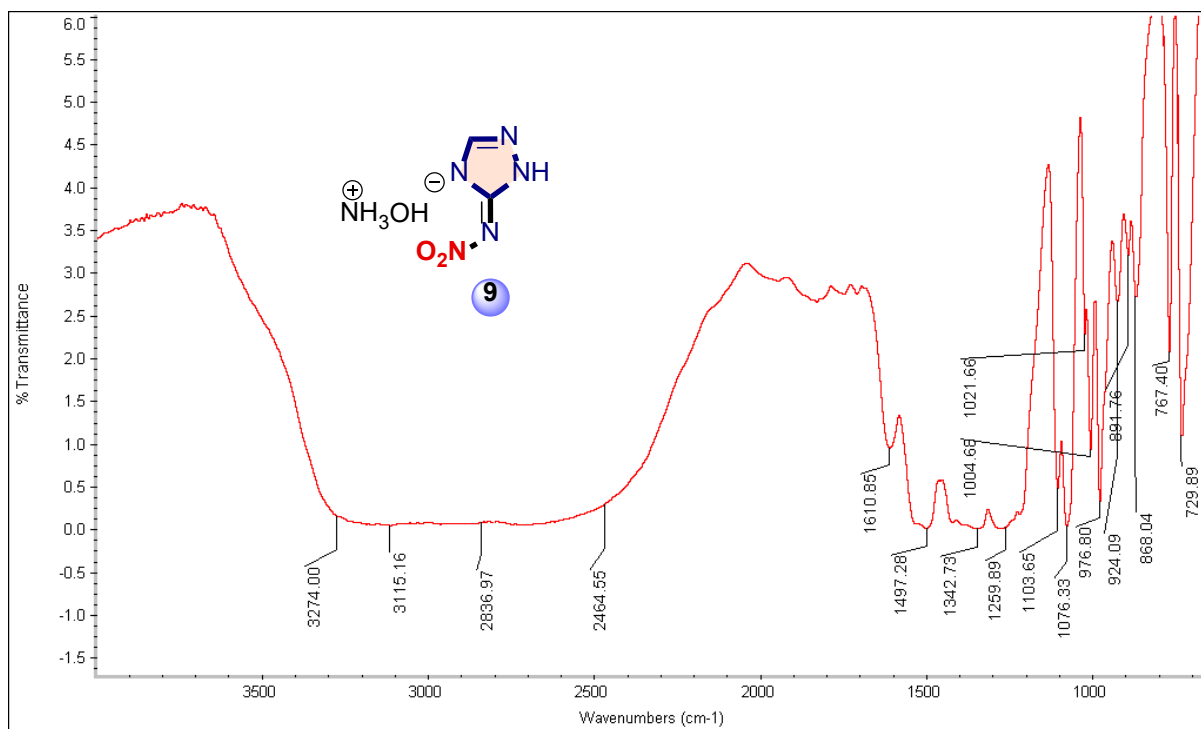

Fig. S32. FTIR-Spectrum of Compound 9.

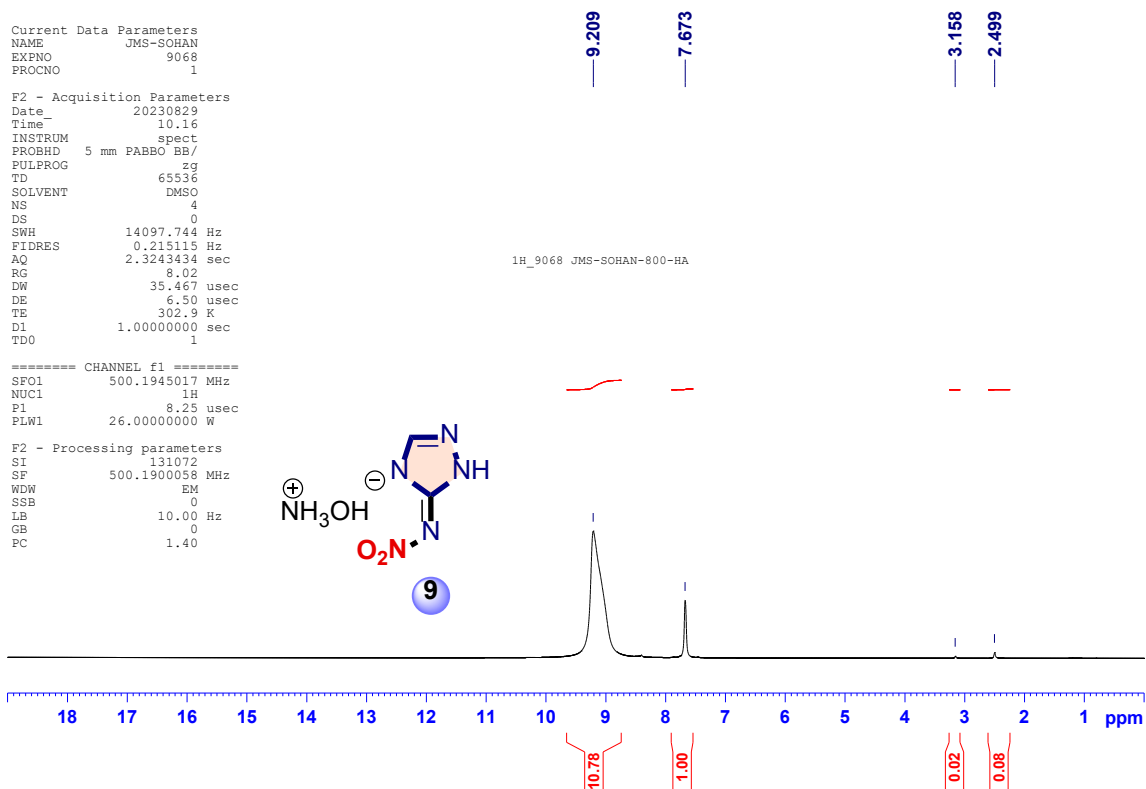

Fig. S33. <sup>1</sup>H NMR Spectrum of Compound 9 (500.19 MHz).

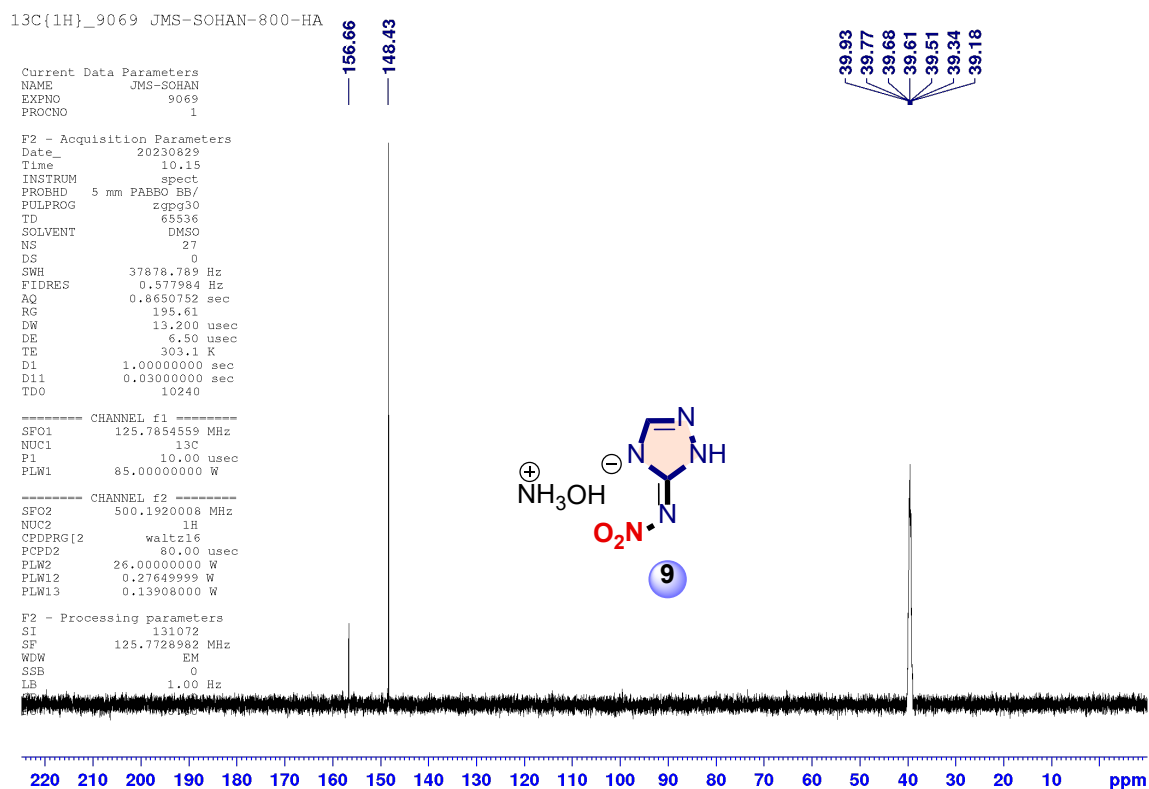

Fig. S34. <sup>13</sup>C NMR Spectrum of Compound 9 (125.77 MHz).

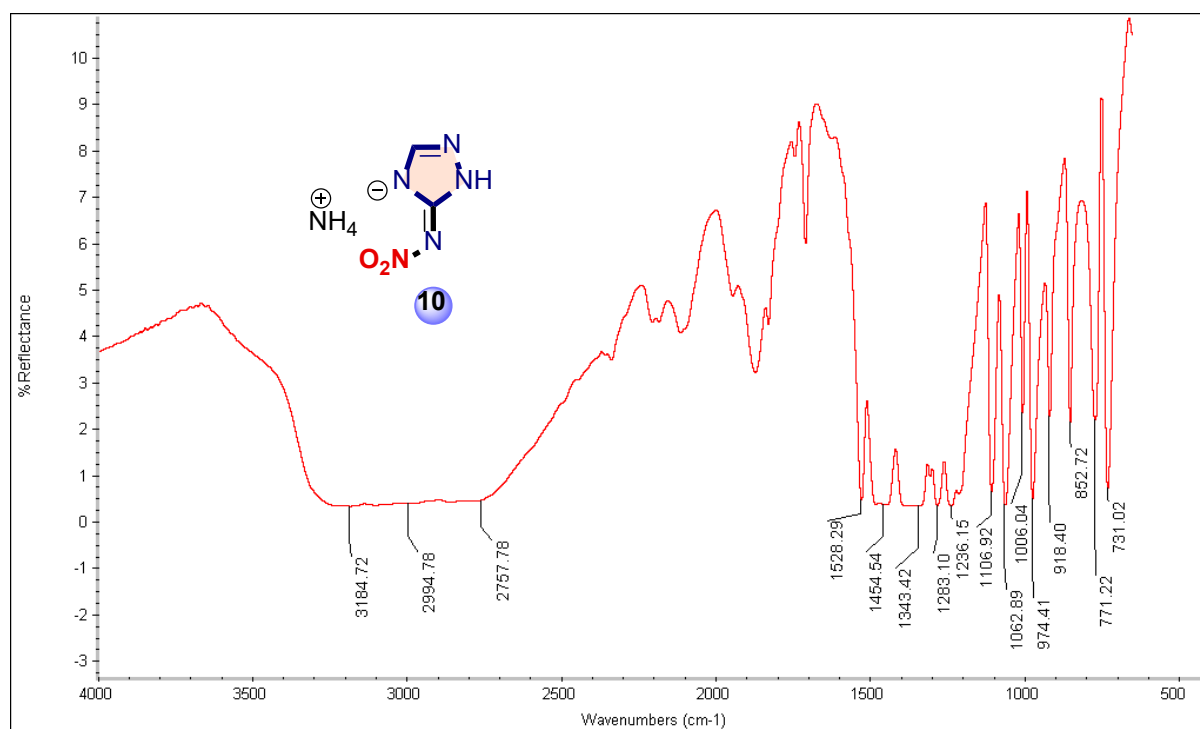

Fig. S35. FTIR-Spectrum of Compound 10.

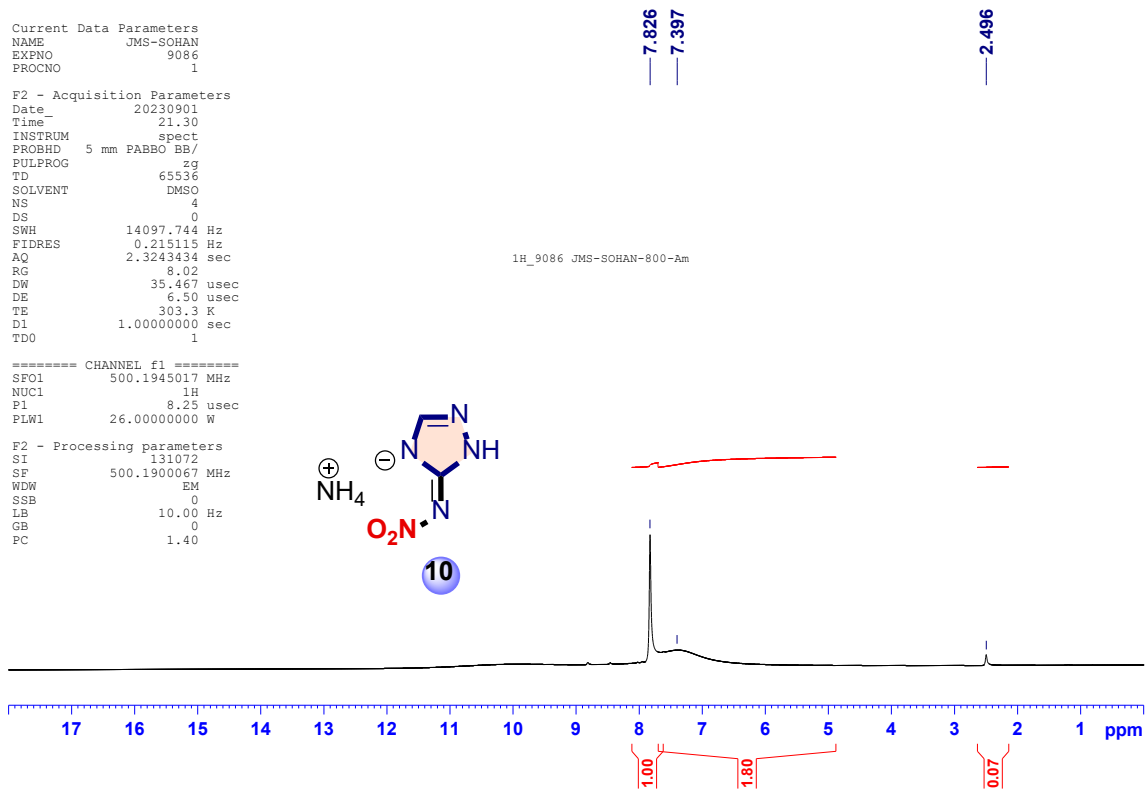

Fig. S36.  $^1\text{H}$  NMR Spectrum of Compound **10** (500.19 MHz).

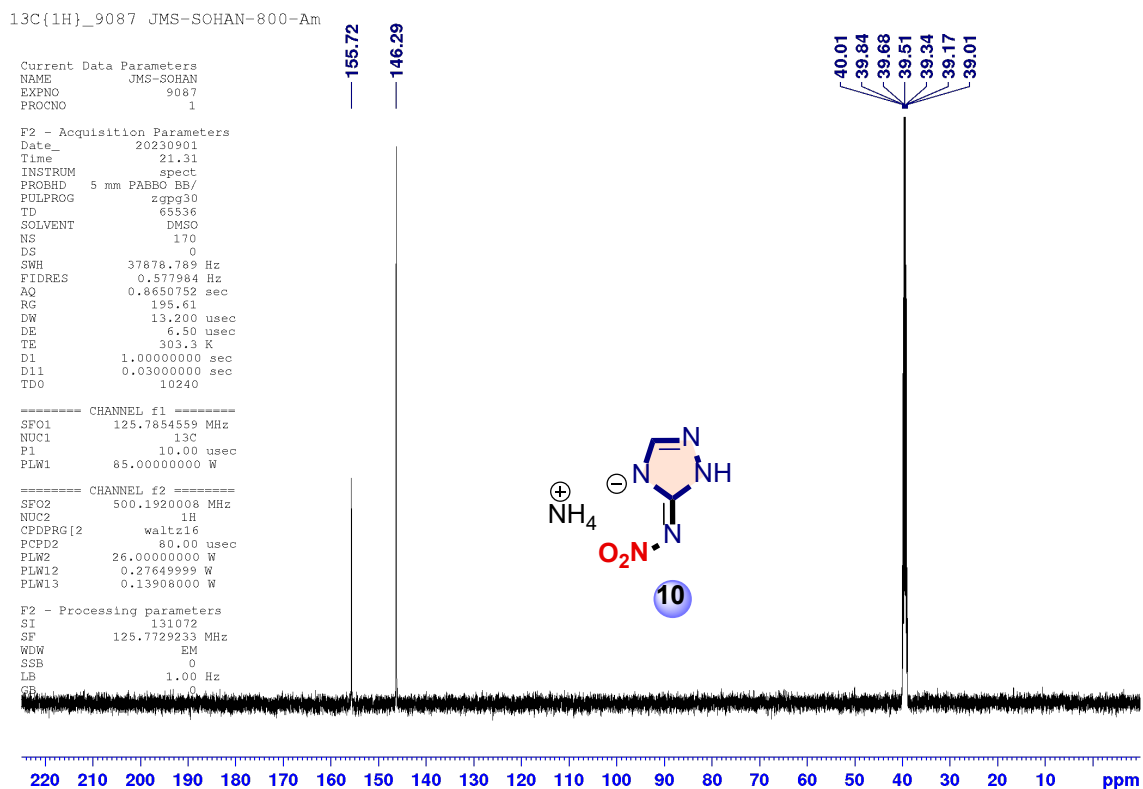

Fig. S37.  $^{13}\text{C}$  NMR Spectrum of Compound **10** (125.77 MHz).

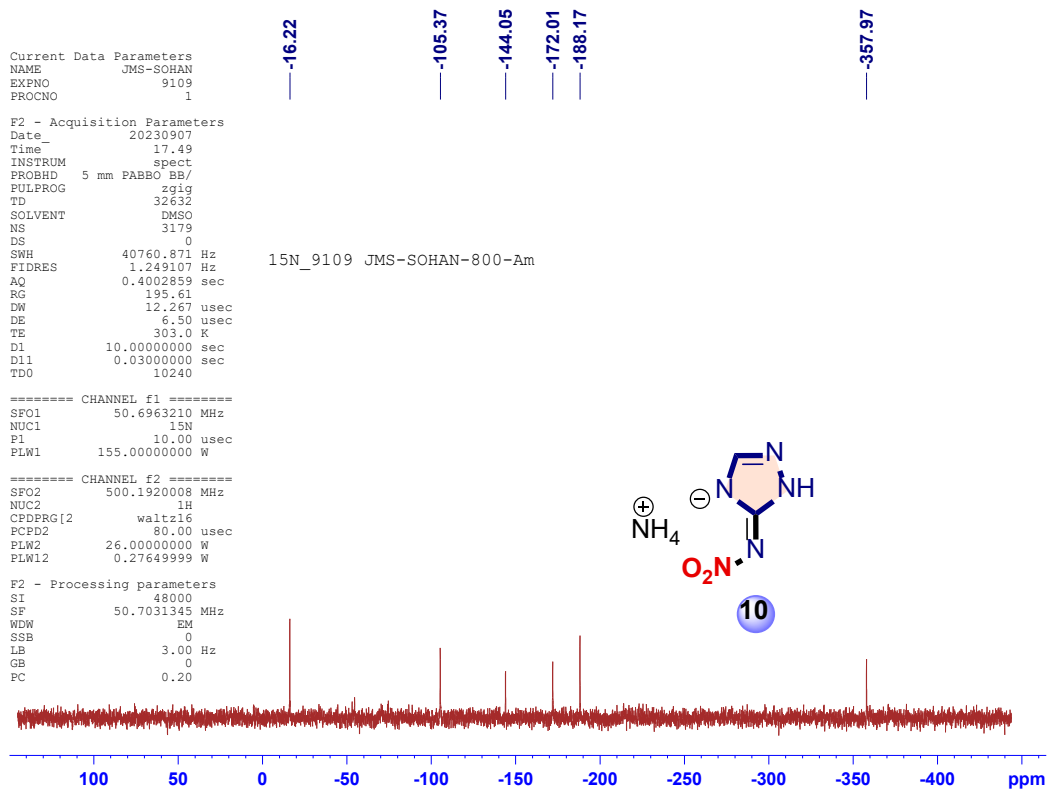

Fig. S38. <sup>1</sup>H NMR Spectrum of Compound 10 (500.19 MHz).

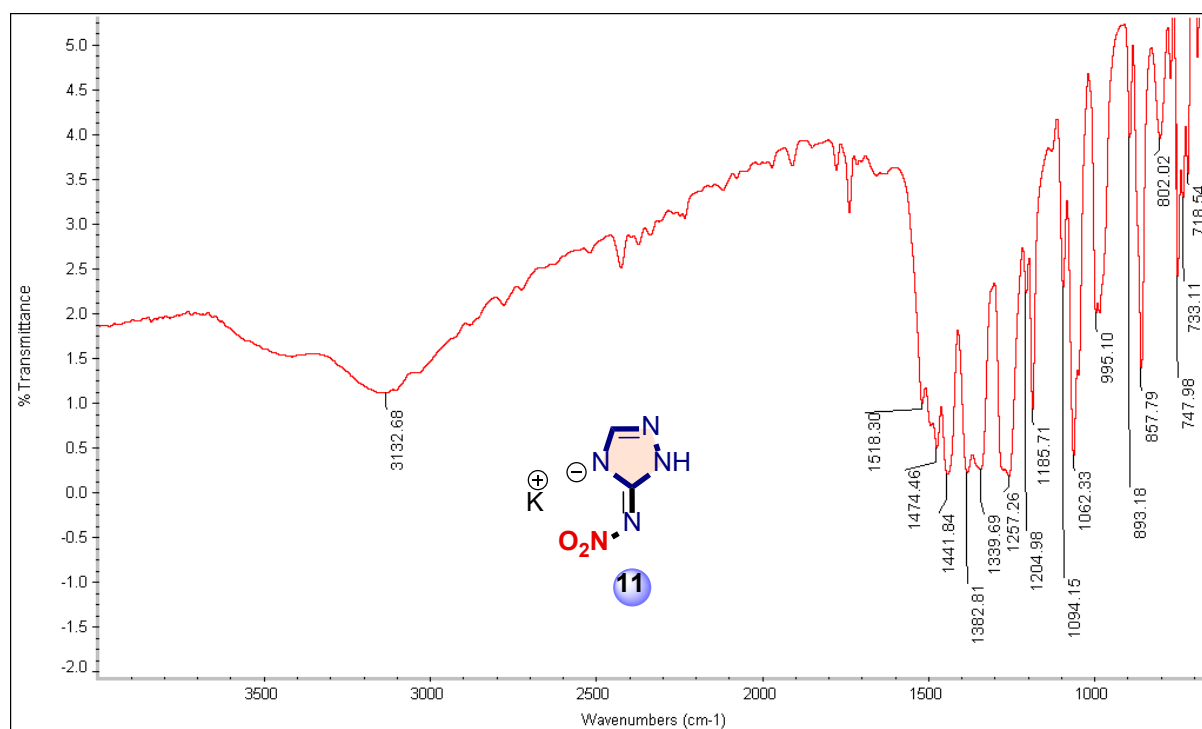

Fig. S39. FTIR-Spectrum of Compound 11.

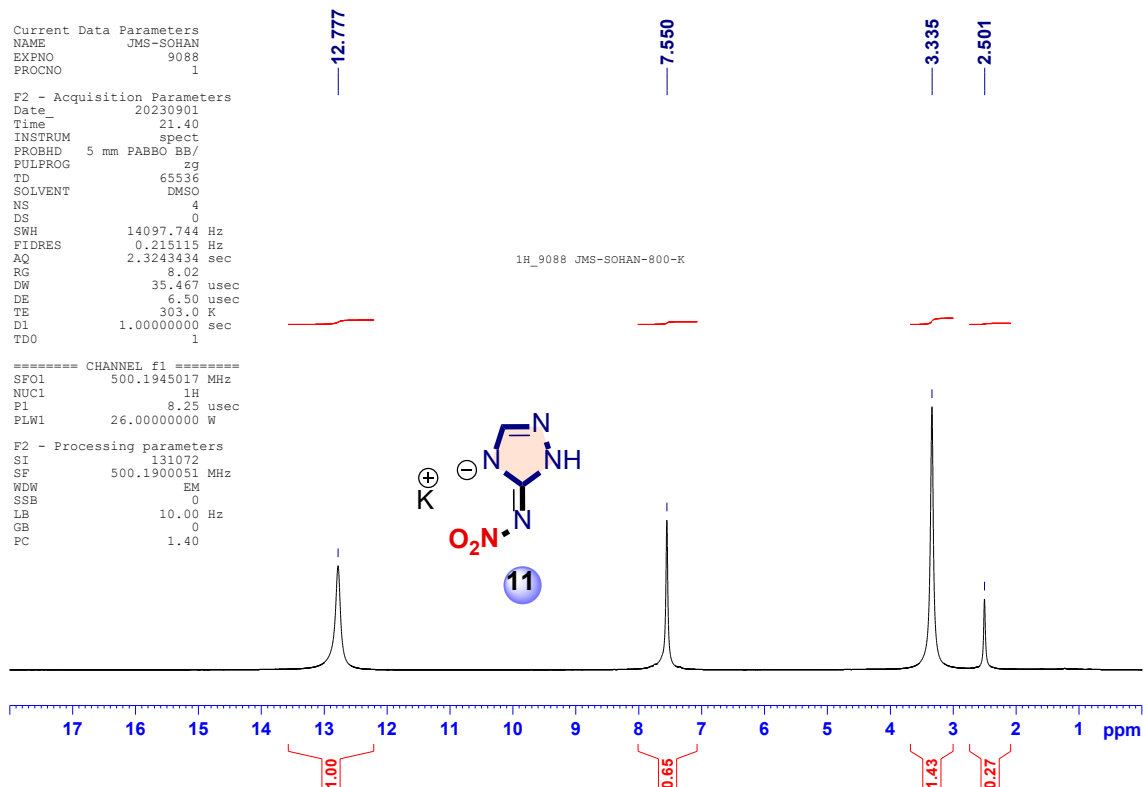

Fig. S40. <sup>1</sup>H NMR Spectrum of Compound 11 (500.19 MHz).

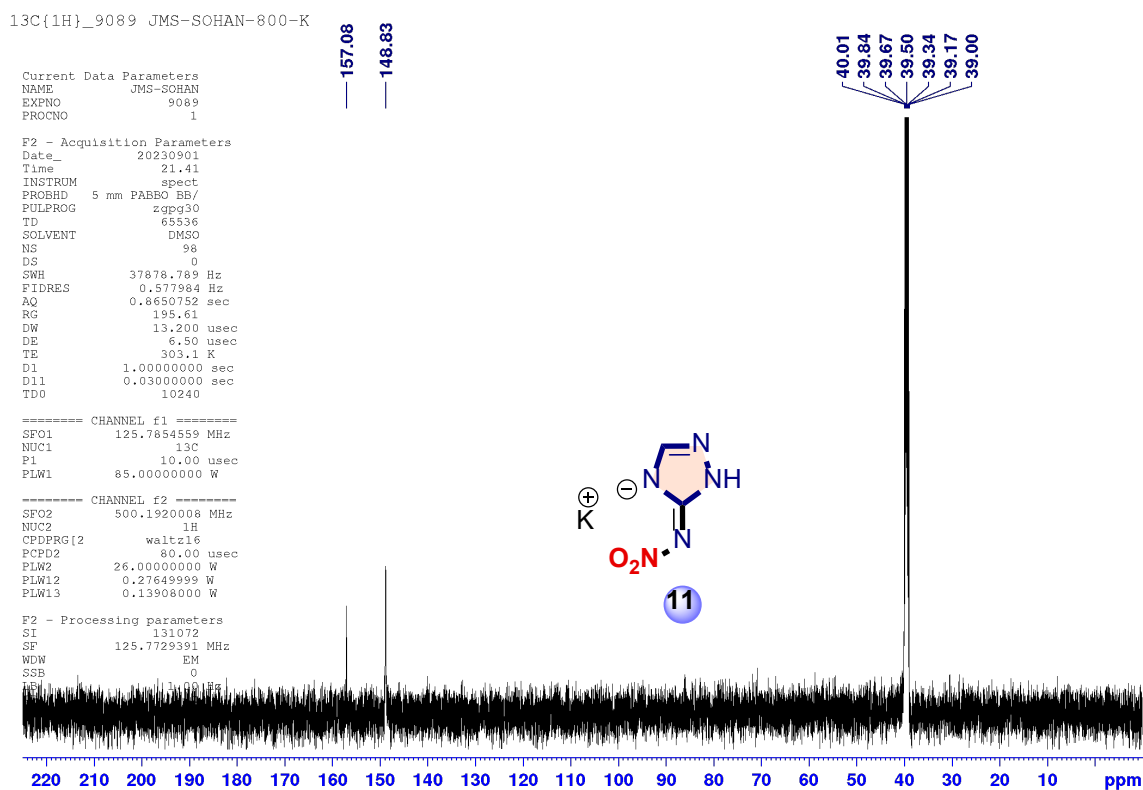

Fig. S41. <sup>13</sup>C NMR Spectrum of Compound 11 (125.77 MHz).



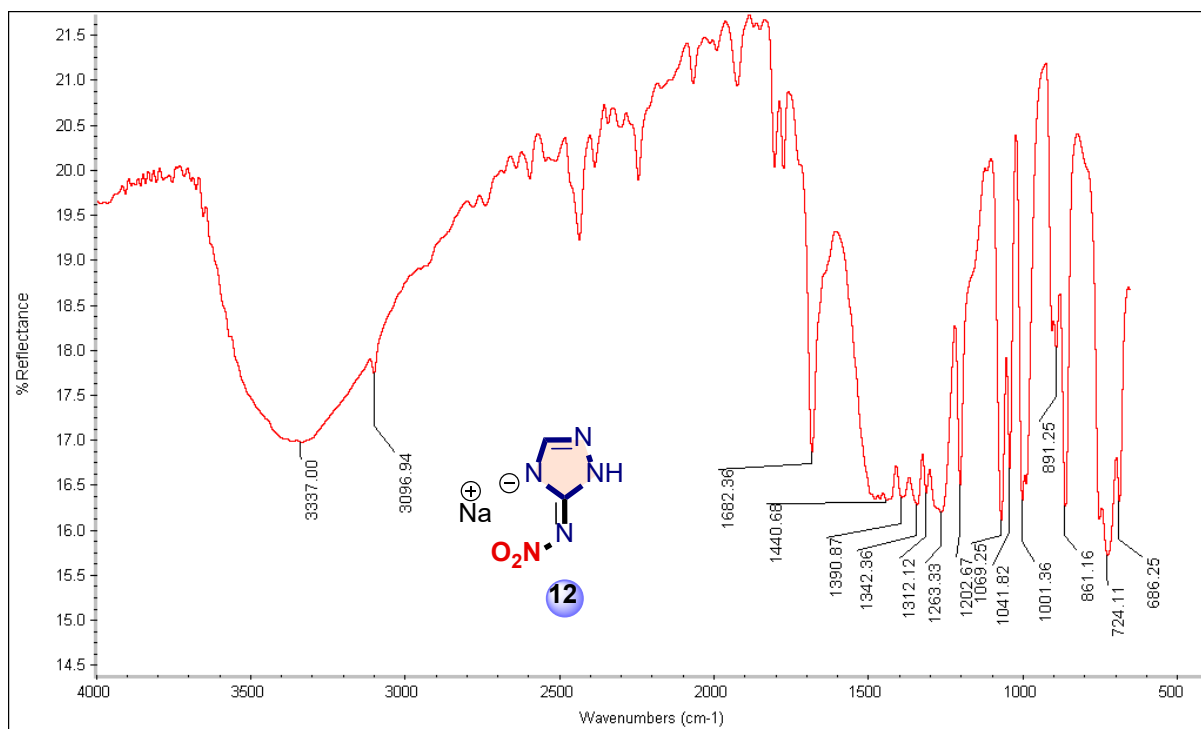

Fig. S42. FTIR-Spectrum of Compound 12.

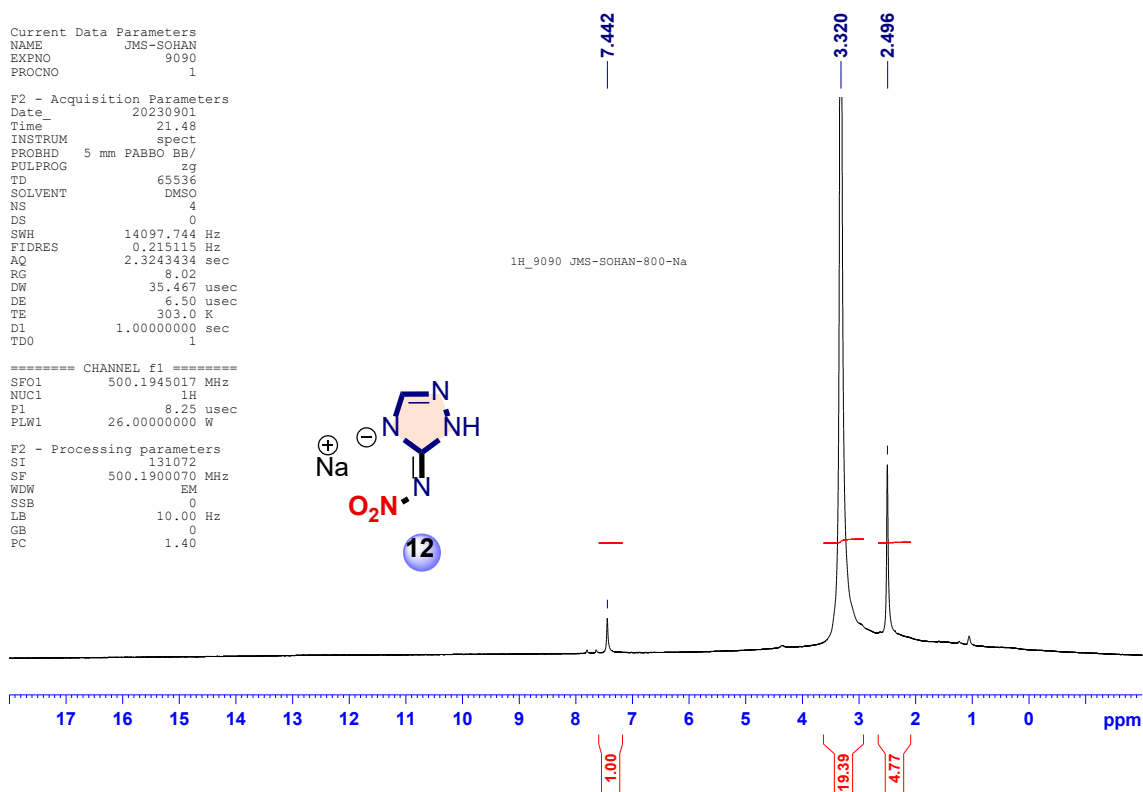

Fig. S43. <sup>1</sup>H NMR Spectrum of Compound 12 (500.19 MHz).

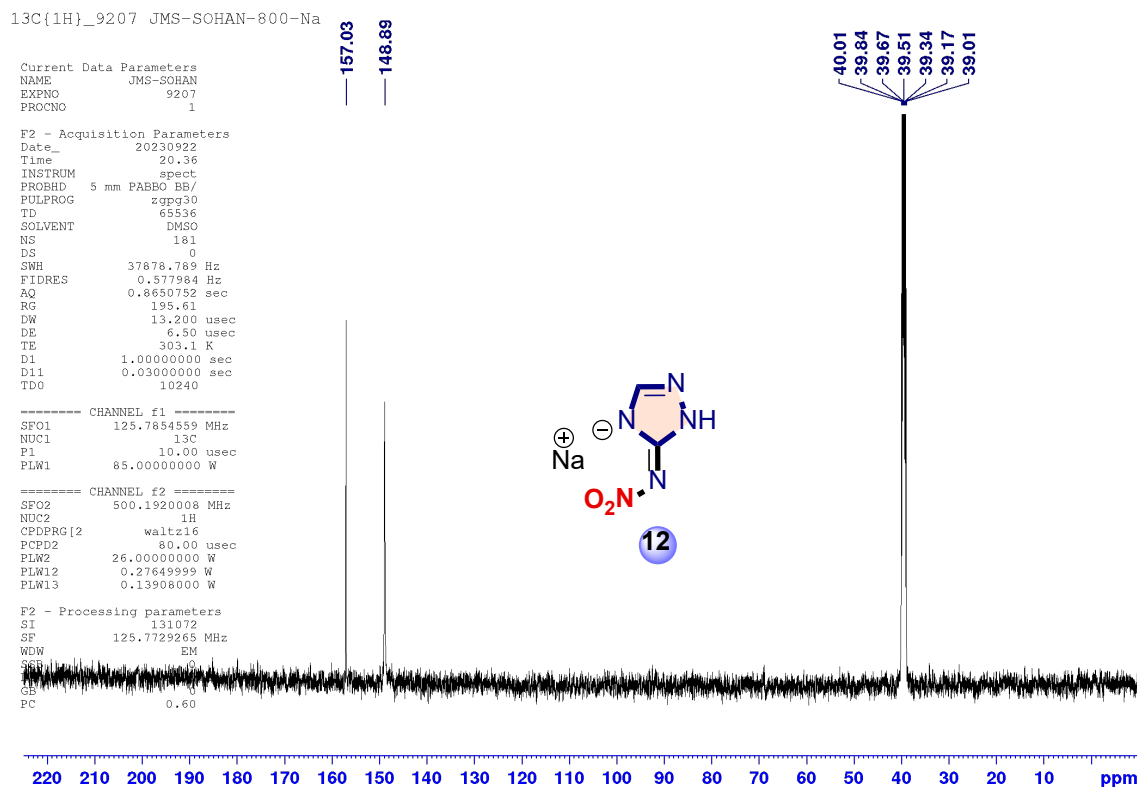

Fig. S44.  $^{13}\text{C}$  NMR Spectrum of Compound **12** (125.77 MHz).

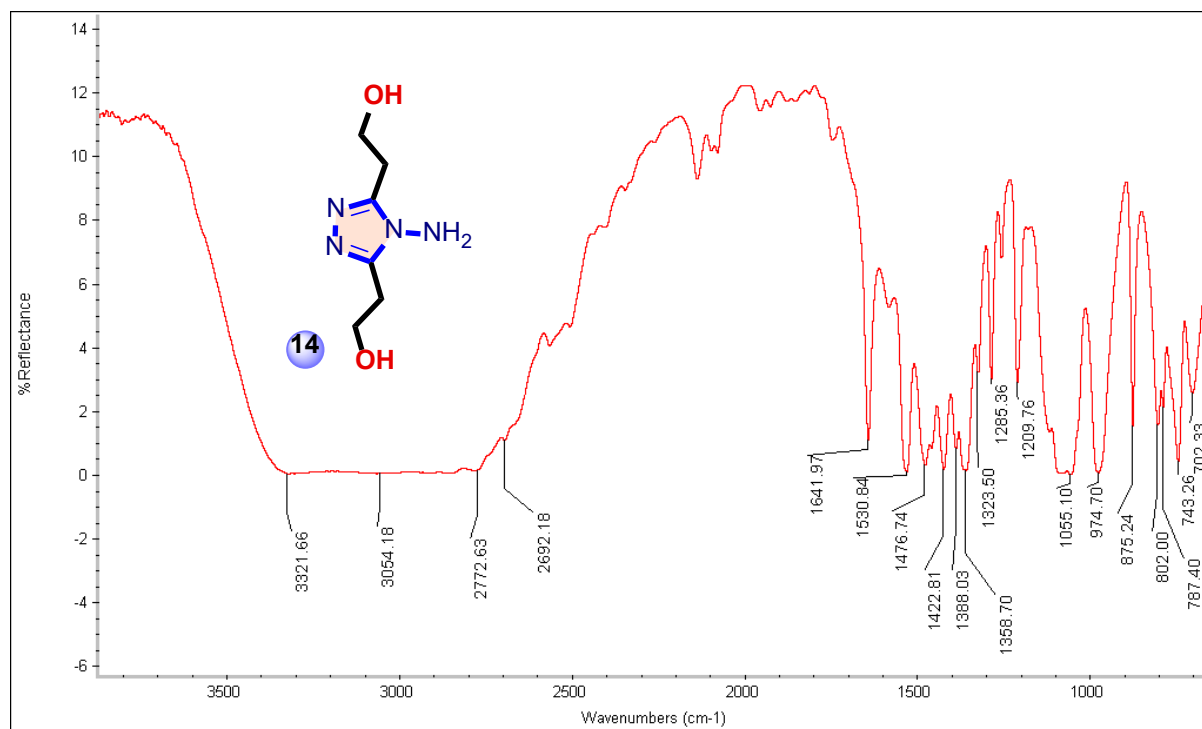

Fig. S45. FTIR-Spectrum of Compound **14**.

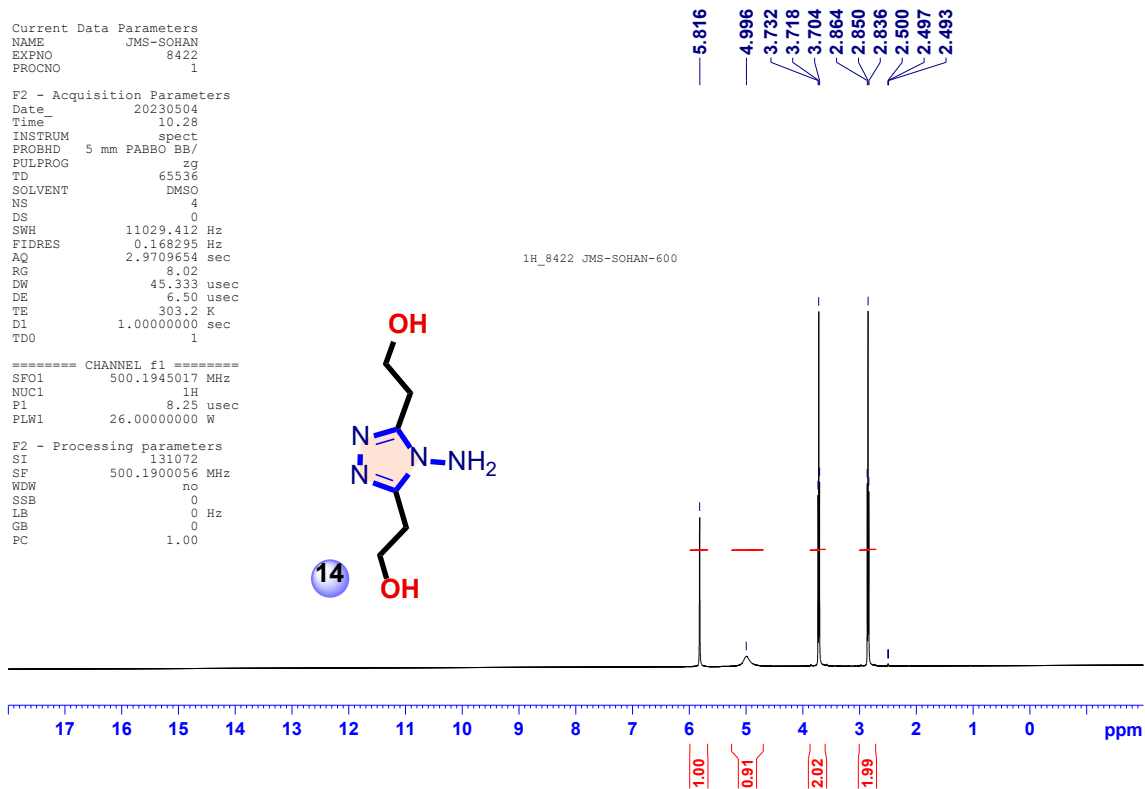

Fig. S46. <sup>1</sup>H NMR Spectrum of Compound 14 (500.19 MHz).

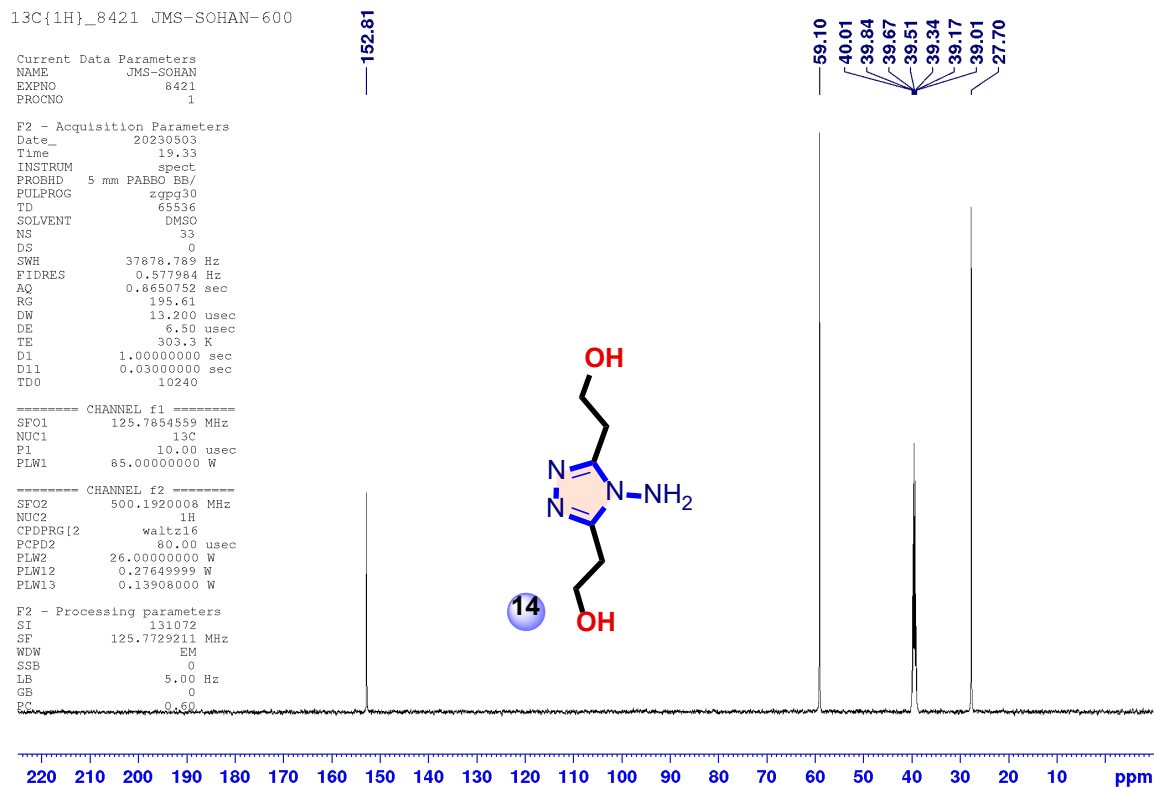

Fig. S47. <sup>13</sup>C NMR Spectrum of Compound 14 (125.77 MHz).

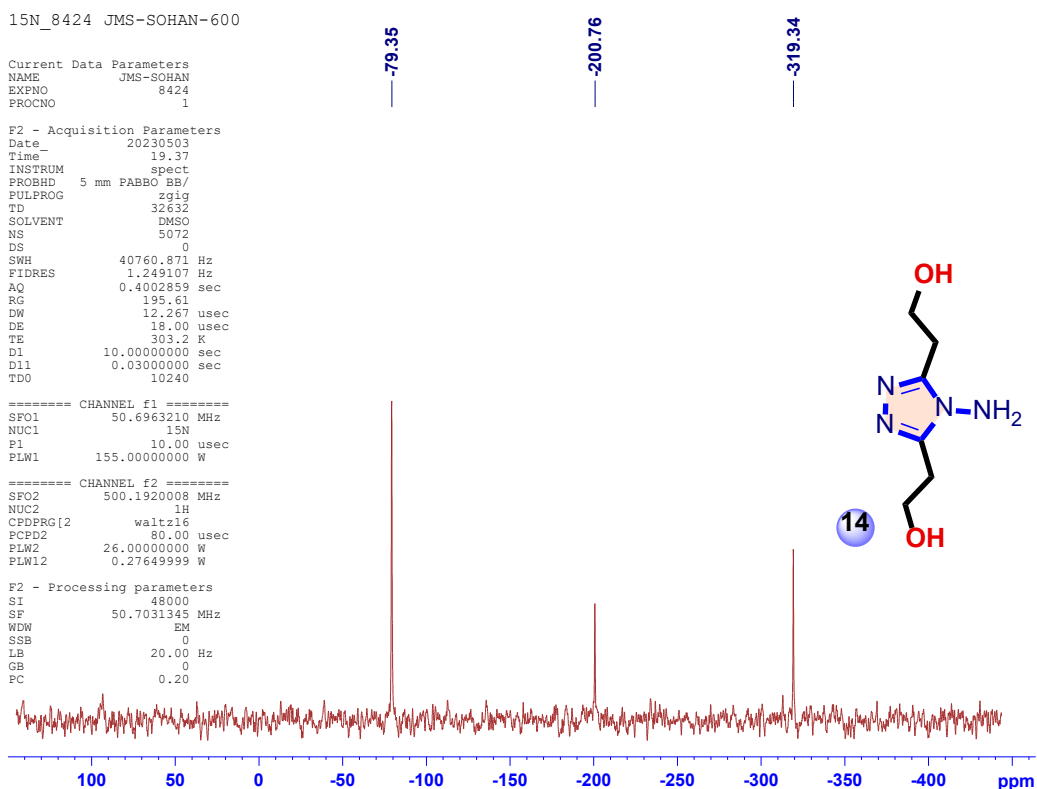

Fig. S48.  $^1\text{H}$  NMR Spectrum of Compound **14** (500.19 MHz).

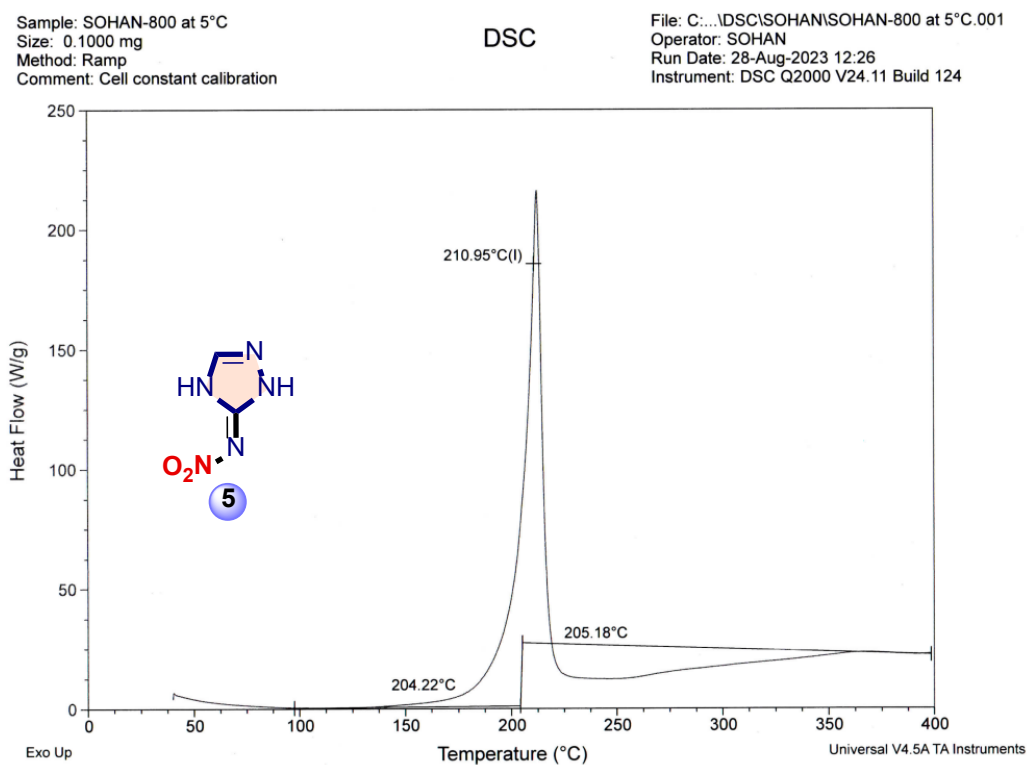

Fig. S49. DSC of compound **5** at  $5\text{ }^\circ\text{C min}^{-1}$

Sample: SOHAN-800 at 5°C  
Size: 2.3170 mg  
Method: Ramp

TGA

File: C:\...TGA\SOHAN\SOHAN-800 at 5°C.001  
Operator: SOHAN  
Run Date: 28-Aug-2023 12:07  
Instrument: TGA Q50 V20.13 Build 39

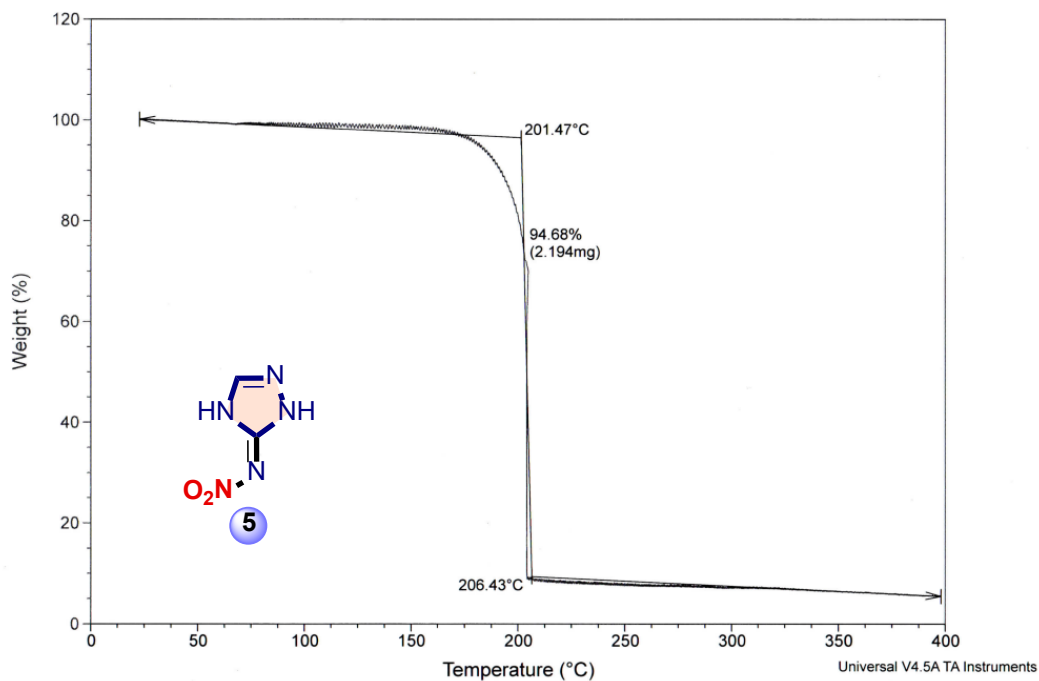

Fig. S50. TGA of compound 5 at 5 °C min<sup>-1</sup>

Sample: SOHAN-143 at 5°C  
Size: 0.1000 mg  
Method: Ramp

DSC

File: C:\...SOHAN\at 5°C\SOHAN-143 at 5°C.001  
Operator: SOHAN  
Run Date: 03-Mar-2022 12:56  
Instrument: DSC Q2000 V24.11 Build 124

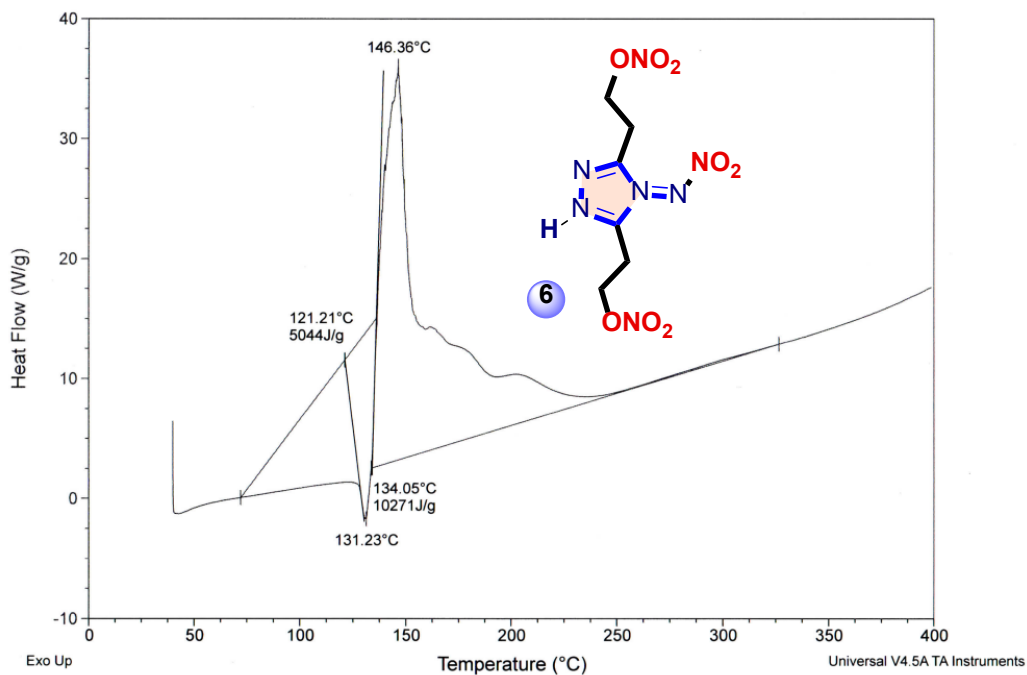

Fig. S51. DSC of compound 6 at 5 °C min<sup>-1</sup>

Sample: SOHAN-143  
Size: 1.7280 mg  
Method: Ramp

TGA

File: C:\TA\Data\TGA\Sohan\SOHAN-143.001  
Operator: SOHAN  
Run Date: 11-Mar-2022 21:52  
Instrument: TGA Q50 V20.13 Build 39

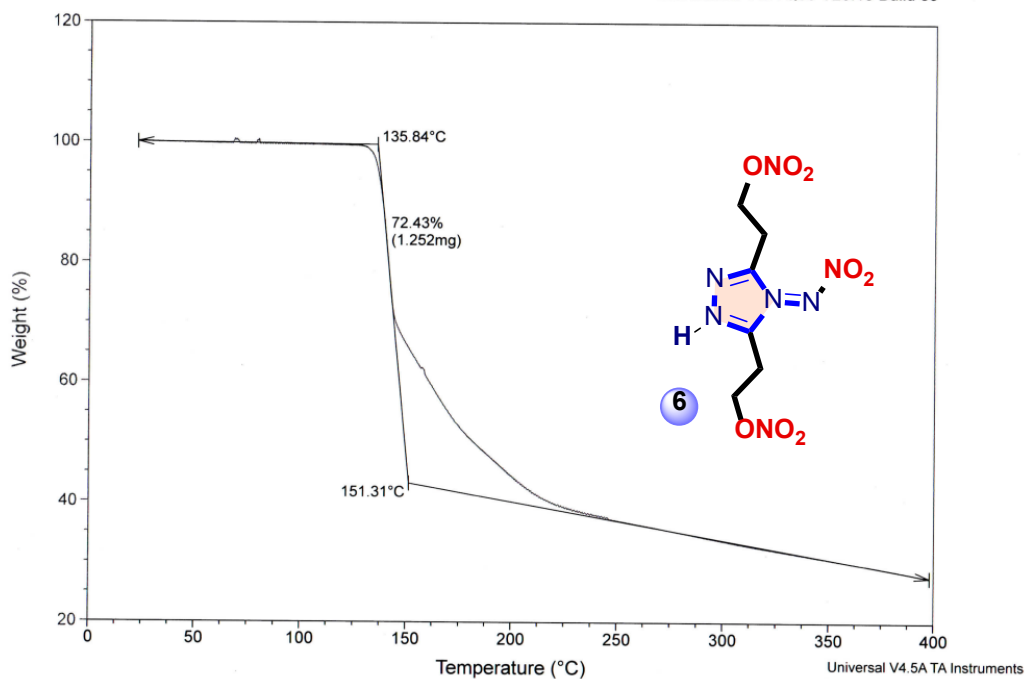

Fig. S52. TGA of compound 6 at 5 °C min<sup>-1</sup>

Sample: SOHAN-800-Hz at 5°C  
Size: 0.1000 mg  
Method: Ramp  
Comment: Cell constant calibration

DSC

File: C:\DSC\SOHAN\SOHAN-800-Hz at 5°C.00  
Operator: SOHAN  
Run Date: 30-Aug-2023 17:22  
Instrument: DSC Q2000 V24.11 Build 124

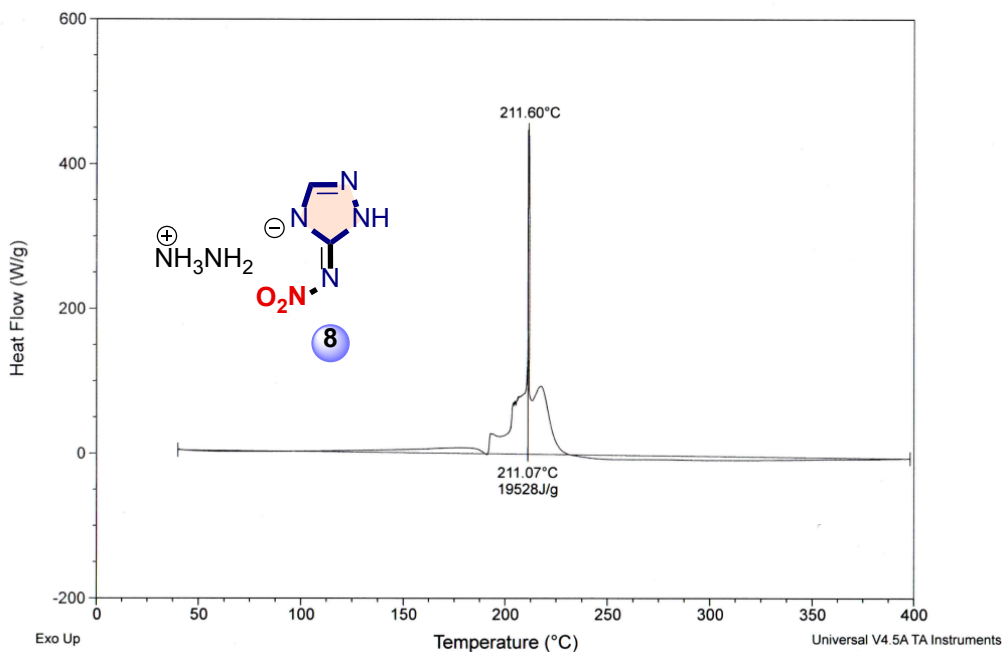

Fig. S53. DSC of compound 8 at 5 °C min<sup>-1</sup>

Sample: SOHAN-800-Hz at 5°C  
Size: 2.3570 mg  
Method: Ramp

TGA

File: C:\...TGA\SOHAN\SOHAN-800-Hz at 5°C.001  
Operator: SOHAN  
Run Date: 30-Aug-2023 22:46  
Instrument: TGA Q50 V20.13 Build 39

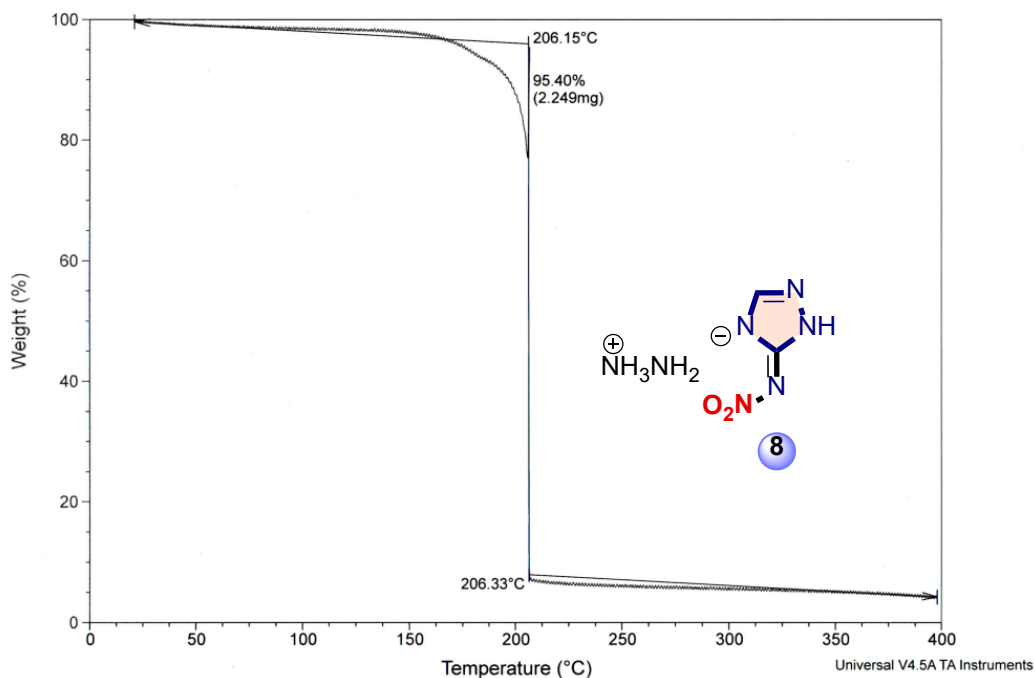

Fig. S54. TGA of compound 8 at 5 °C min<sup>-1</sup>

Sample: SOHAN-800-HA at 5°C  
Size: 0.1000 mg  
Method: Ramp  
Comment: Cell constant calibration

DSC

File: C:\...DSC\SOHAN\SOHAN-800-HA at 5°C.001  
Operator: SOHAN  
Run Date: 30-Aug-2023 11:59  
Instrument: DSC Q2000 V24.11 Build 124

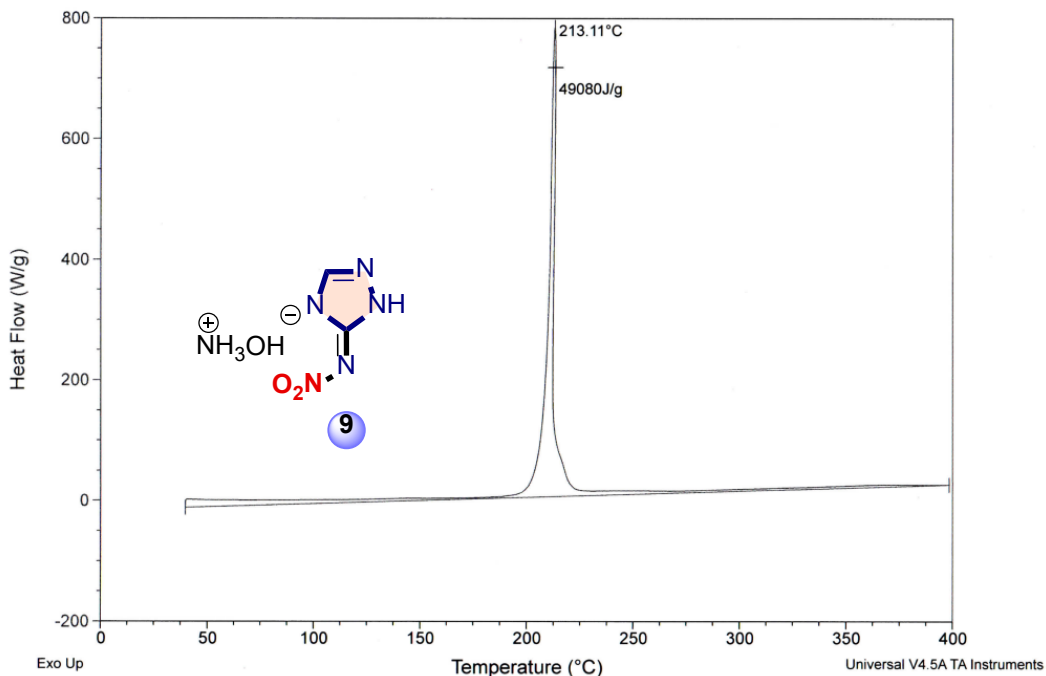

Fig. S55. DSC of compound 9 at 5 °C min<sup>-1</sup>

Sample: SOHAN-800-HA at 5°C  
Size: 2.1520 mg  
Method: Ramp

TGA

File: C:\...TGA\SOHAN\SOHAN-800-HA at 5°C.001  
Operator: SOHAN  
Run Date: 11-Sep-2023 21:15  
Instrument: TGA Q50 V20.13 Build 39

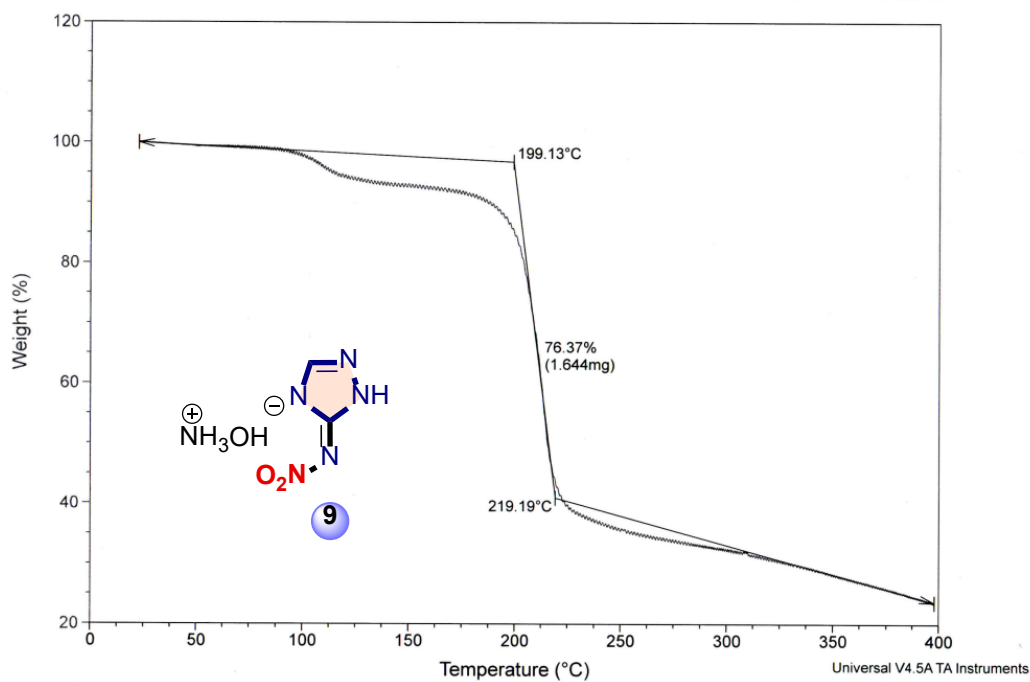

Fig. S56. TGA of compound 9 at 5 °C min<sup>-1</sup>

Sample: SOHAN-800-Am at 5°C  
Size: 0.1000 mg  
Method: Ramp

DSC

File: C:\...SOHAN\SOHAN-800-Am at 5°C.001  
Operator: SOHAN  
Run Date: 11-Sep-2023 22:13  
Instrument: DSC Q2000 V24.11 Build 124

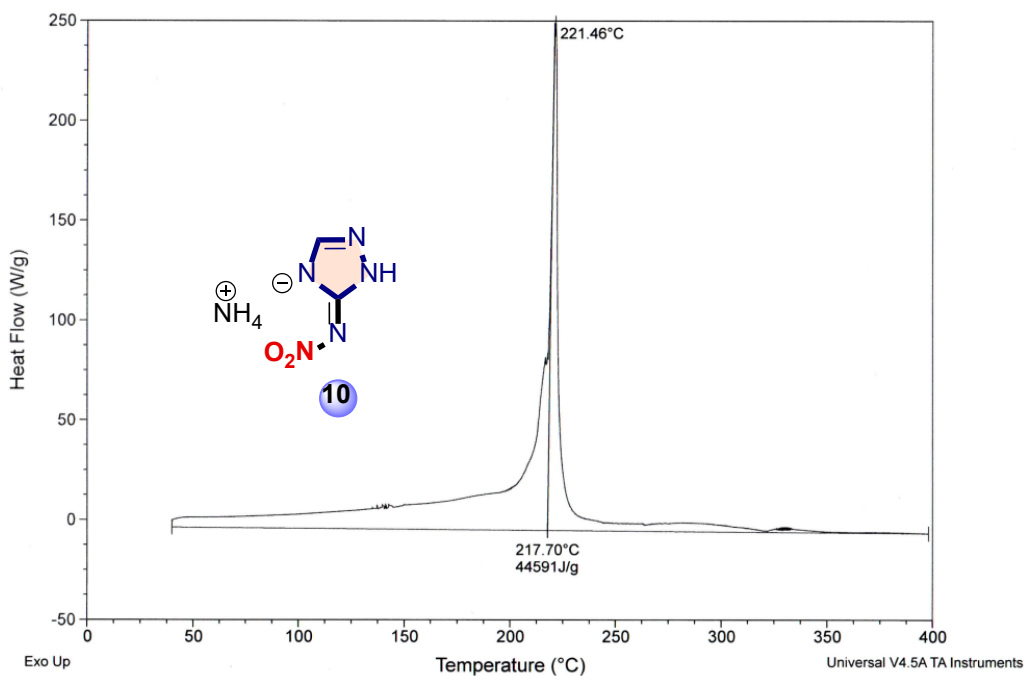

Fig. S57. DSC of compound 10 at 5 °C min<sup>-1</sup>



Sample: SOHAN-800-Am at 5°C  
Size: 2.5710 mg  
Method: Ramp

TGA

File: C:\...TGA\Sohan\SOHAN-800-Am at 5°C.001  
Operator: SOHAN  
Run Date: 30-Aug-2023 16:57  
Instrument: TGA Q50 V20.13 Build 39

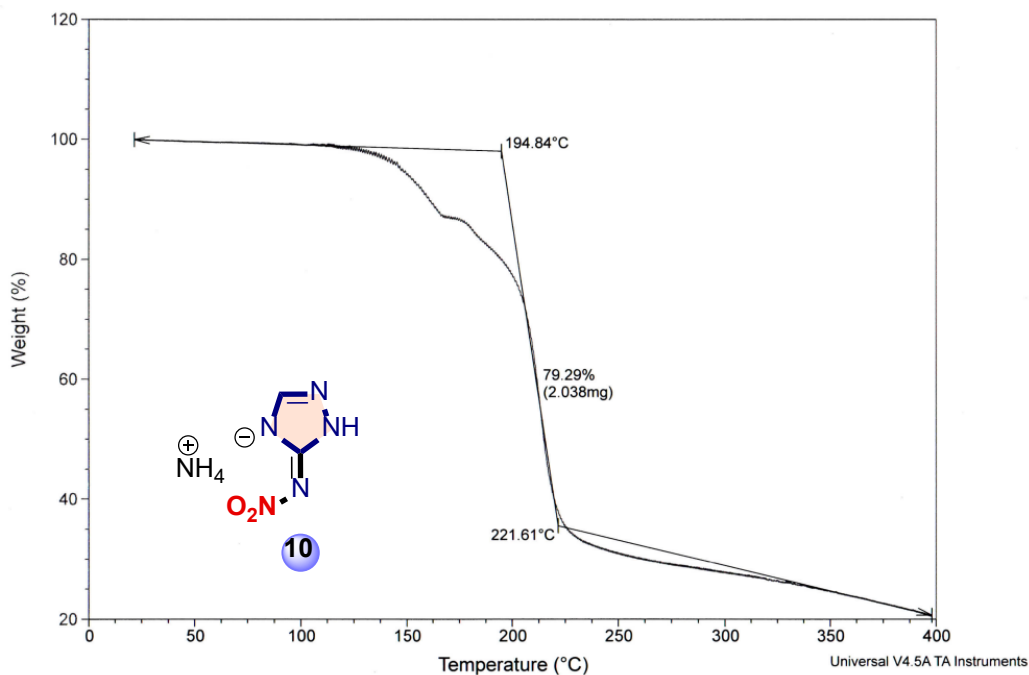

Fig. S58. TGA of compound 10 at 5 °C min<sup>-1</sup>

Sample: SOHAN-800-K (1Q) at 10°C  
Size: 0.1000 mg  
Method: Ramp  
Comment: Cell constant calibration

DSC

File: C:\...SOHAN-800-K (1Q) at 10°C.001  
Operator: SOHAN  
Run Date: 02-Sep-2023 15:11  
Instrument: DSC Q2000 V24.11 Build 124

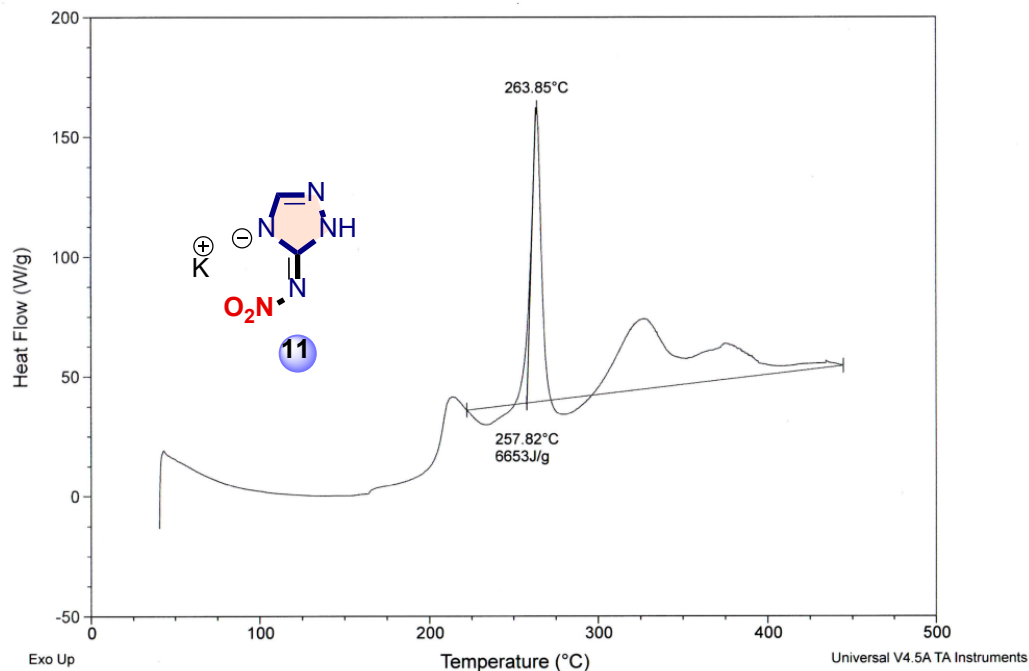

Fig. S59. DSC of compound 11 at 5 °C min<sup>-1</sup>

Sample: SOHAN-800-K at 5°C  
Size: 2.0500 mg  
Method: Ramp

TGA

File: C:\...TGA\SOHAN\SOHAN-800-K at 5°C.001  
Operator: SOHAN  
Run Date: 12-Sep-2023 19:53  
Instrument: TGA Q50 V20.13 Build 39

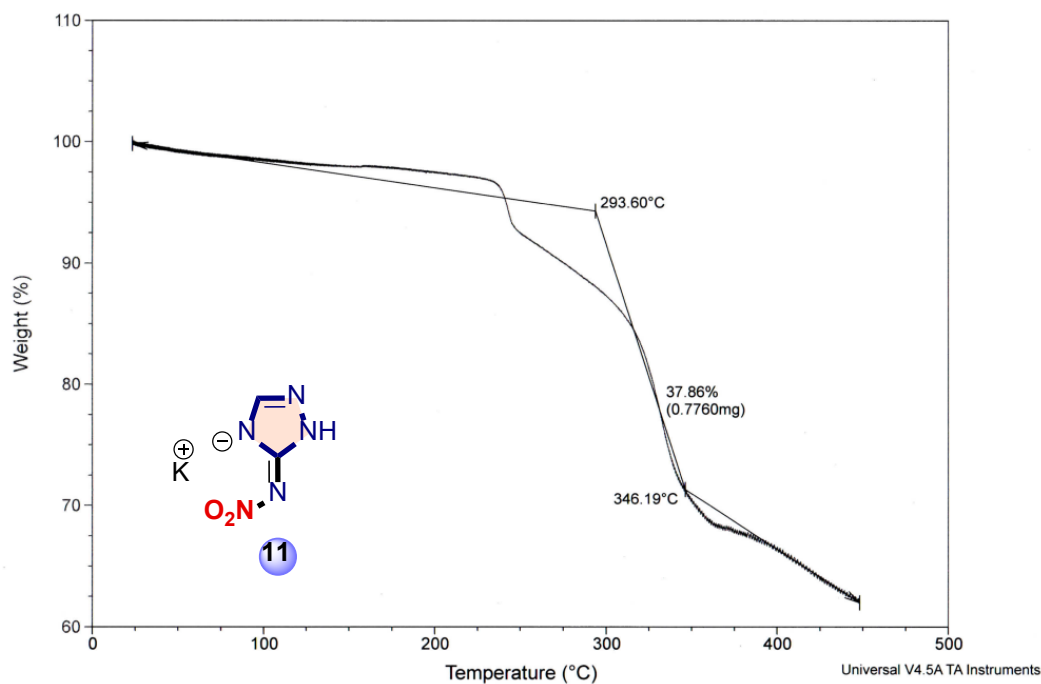

Fig. S60. TGA of compound 11 at 5 °C min<sup>-1</sup>

Sample: SOHAN-800-Na at 5°C  
Size: 0.1000 mg  
Method: Ramp

DSC

File: C:\...DSC\SOHAN\SOHAN-800-Na at 5°C.00:  
Operator: SOHAN  
Run Date: 12-Sep-2023 16:14  
Instrument: DSC Q2000 V24.11 Build 124

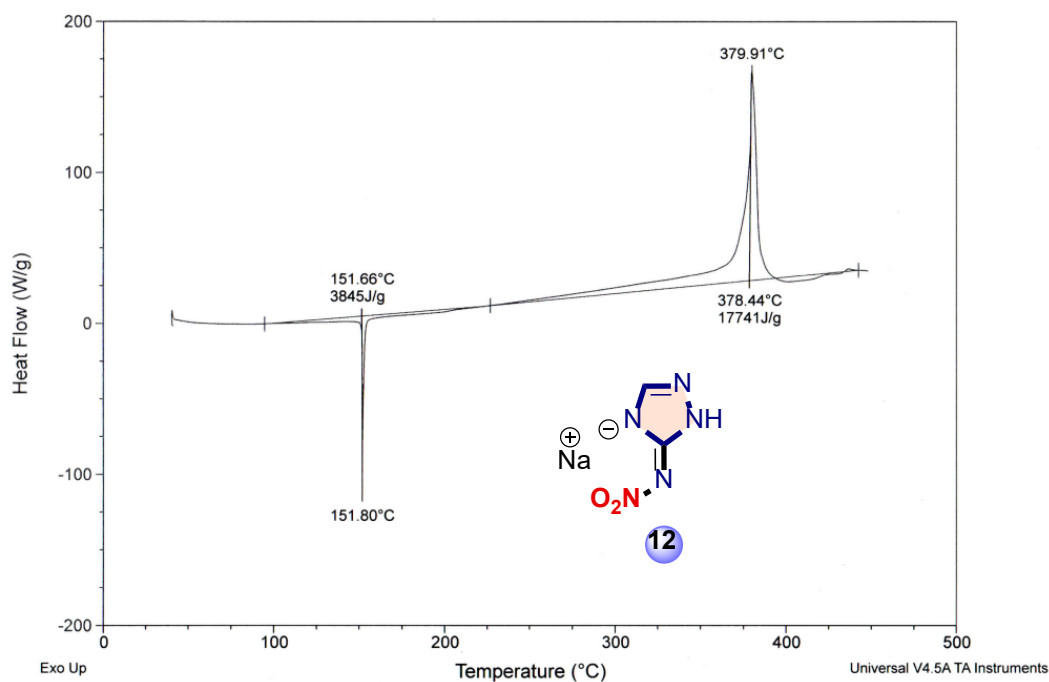

Fig. S61. DSC of compound 12 at 5 °C min<sup>-1</sup>

Sample: SOHAN-800-Na at 5°C  
Size: 2.4490 mg  
Method: Ramp

TGA

File: C:\...TGA\SOHAN\SOHAN-800-Na at 5°C.001  
Operator: SOHAN  
Run Date: 12-Sep-2023 16:27  
Instrument: TGA Q50 V20.13 Build 39

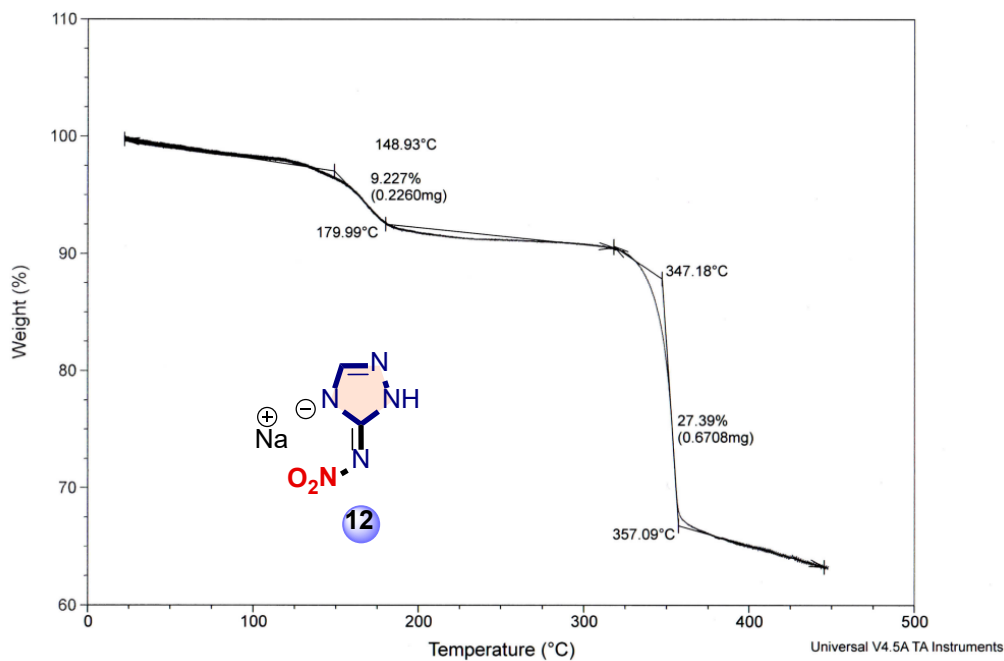

Fig. S62. TGA of compound 12 at 5 °C min<sup>-1</sup>

Sample: SOHAN-45-R-5°C  
Size: 0.1000 mg  
Method: Ramp

DSC

File: C:\...SOHAN\at 5°C\SOHAN-45-R-5°C.001  
Operator: SOHAN  
Run Date: 24-Jan-2022 13:29  
Instrument: DSC Q2000 V24.11 Build 124

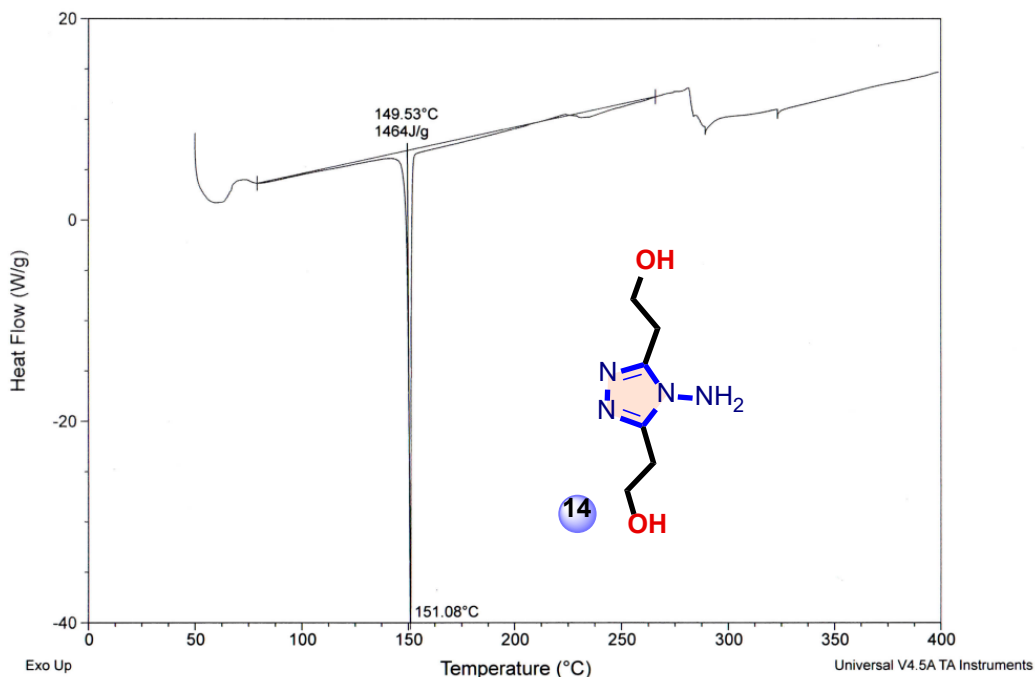

Fig. S63. DSC of compound 14 at 5 °C min<sup>-1</sup>

Sample: SOHAN-45 at 5°C  
Size: 2.1880 mg  
Method: Ramp

TGA

File: C:\TA\Data\TGA\Sohan\SOHAN-45 at 5°C.00  
Operator: SOHAN  
Run Date: 11-Sep-2023 16:56  
Instrument: TGA Q50 V20.13 Build 39

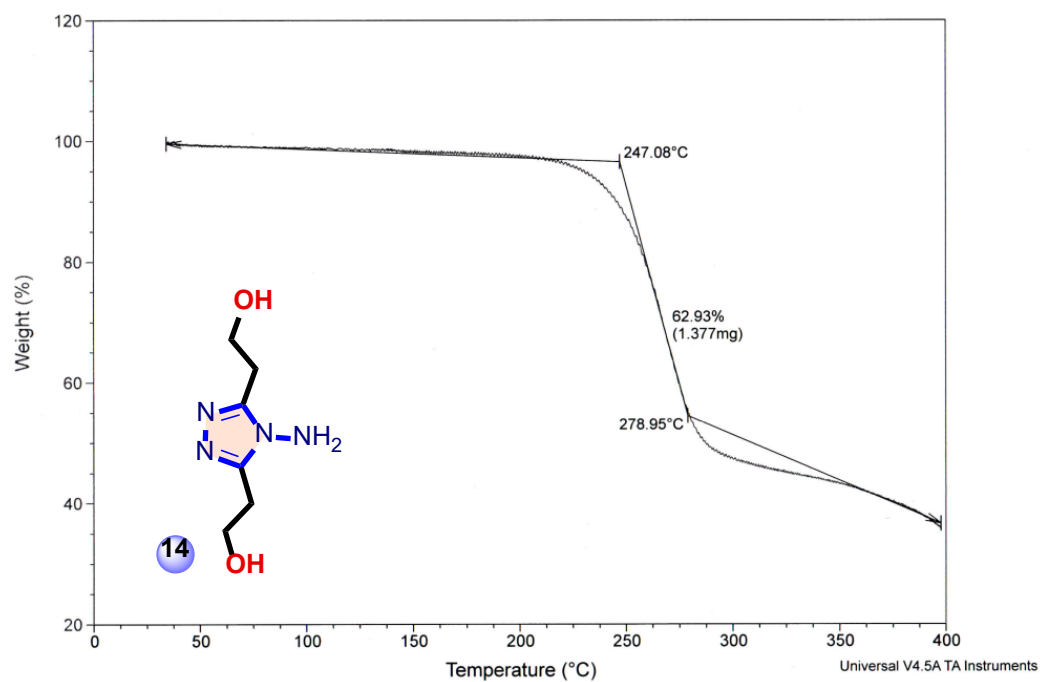

Fig. S64. TGA of compound 14 at 5 °C min<sup>-1</sup>

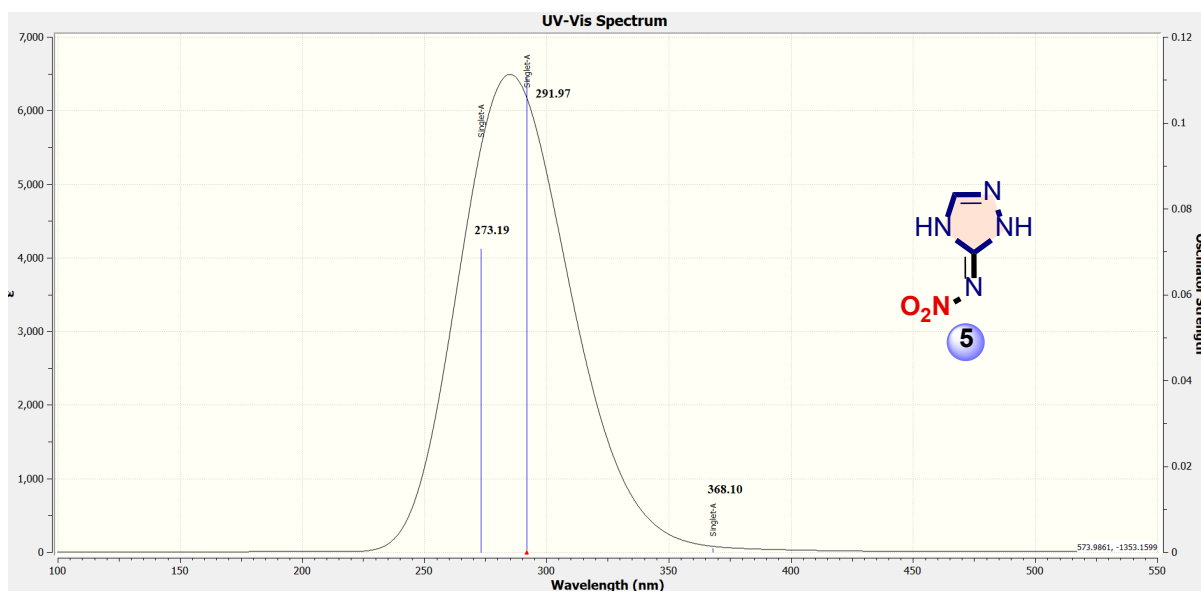

Figure S65. Predicted UV-Visible spectrum of 5 at B3LYP/6-311++G(d,p) level.

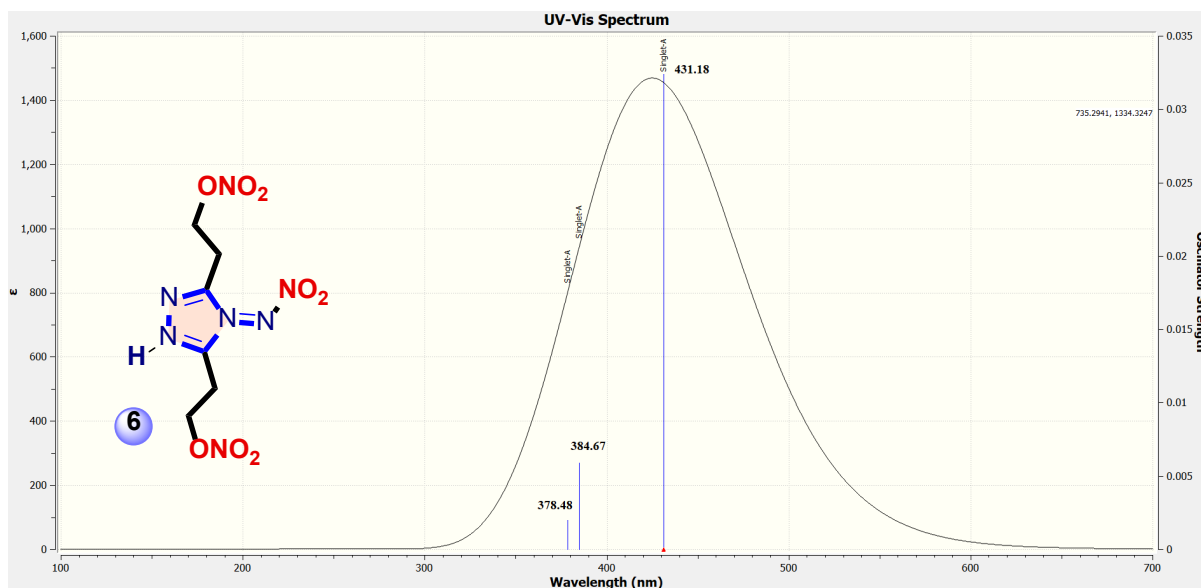

**Figure S66.** Predicted UV-Visible spectrum of **6** at B3LYP/6-311++G(d,p) level.

## REFERENCES

1. M. J. Frisch, G. W. Trucks, H. B. Schlegel, G. E. Scuseria, M. A. Robb, J. R. Cheeseman, G. Scalmani, V. Barone, B. Mennucci, G. A. Petersson, H. Nakatsuji, M. L. Caricato, X. H. P. Hratchian, A. F. Izmaylov, J. Bloino, G. Zheng, J. L. Sonnenberg, M. Hada, M. Ehara, K. Toyota, R. Fukuda, J. Hasegawa, M. Ishida, T. Nakajima, Y. Honda, O. Kitao, H. Nakai, T. Vreven, J. A. Montgomery, Jr. J. E. Peralta, F. Ogliaro, M. Bearpark, J. J. Heyd, E. Brothers, K. N. Kudin, V. N. Staroverov, R. Kobayashi, J. Normand, K. Raghavachari, A. Rendell, J. C. Burant, S. S. Iyengar, J. Tomasi, M. Cossi, N. Rega, N. J. Millam, M. Klene, J. E. Knox, J. B. Cross, V. Bakken, C. Adamo, J. Jaramillo, R. Gomperts, R. E. Stratmann, O. Yazyev, A. J. Austin, R. Cammi, C. Pomelli, J. W. Ochterski, R. L. Martin, K. Morokuma, V. G. Zakrzewski, G. A. Voth, P. Salvador, J. J. Dannenberg, S. Dapprich, A. D. Daniels, Ö. Farkas, J. B. Foresman, J. V. Ortiz, J. Cioslowski, D. J. Fox, Revision D.01 ed. Gaussian Inc. Wallingford CT, 2003.
2. P. W. Atkins, Physical Chemistry, Oxford University press: Oxford 1982.
3. M. S. Westwell, M. S. Searle, D. J. Wales, Williams, D. H. Empirical correlations between thermodynamic properties and intermolecular forces, *J. Am. Chem. Soc.* 1995, **117**, 5013–5015
4. (a) H. Gao, C. Ye, C. M. Piekarski, J. M. Shreeve, Computational characterization of energetic salts, *J. Phys. Chem. C* 2007, **111**, 10718–10731. (b) M. Kamalvand,

- M. H. Keshavarz, M. Jafari, Prediction of the Strength of Energetic Materials Using the Condensed and Gas Phase Heats of Formation, *Propellants Explos. Pyrotech.* 2015, **40**, 551-557.
5. A 20 mg sample was subjected to a drop-hammer test with a 5 or 10 kg dropping weight. The impact sensitivity was characterized according to the UN recommendations (insensitive, >40J; less sensitive, 35 J; sensitive, 4J; very sensitive, 3 J). (c) Recommendations on the transport of dangerous goods, manual of tests and criteria, 7th revised edition; United Nations: New York 2019.
  6. G. M. Sheldrick, Crystal structure refinement with SHELXL, *Acta Crystallogr. Sect. A Found. Adv.* 2015, **C71**, 3-8.
  7. G. M. Sheldrick, A short history of *ShelX*, *Acta Cryst.* 2008, **A64**, 112-122.
  8. Twin reference: S. Parsons, Introduction to twinning *Acta Cryst.* 2003, **D59**, 1995-2003.
  9. (a) CrysAlisPro Software System, Rigaku Oxford Diffraction, 2020. (b) G. M. Sheldrick, ShelXT-Integrated space-group and crystal-structure determination, *Acta Cryst.* 2015, **A71**, 3-8.
  10. O. V. Dolomanov, L. J. Bourhis, R. J. Gildea, J. A. K. Howard, H. Puschmann, OLEX2 A complete structure solution, refinement and analysis program. *J. Appl. Crystallogr.* 2009, **42**, 339-341.
